# Supplementary material
Source: PubMed Central journal article supplement (PMC8141059)
Supplement: NIHMS1662066-supplement-Supplementary_Material.pdf [file NIHMS1662066-supplement-Supplementary_Material.pdf]

## Supplementary Material

### Bile Acid Profiles in Primary Sclerosing Cholangitis and their Ability to Predict Hepatic

#### Decompensation

Omar Y. Mousa, Brian D. Juran, Bryan M. McCauley, Mette N. Vesterhus, Trine Folseraas, Coleman T. Turgeon, Ahmad H. Ali, Erik M. Schlicht, Elizabeth J. Atkinson, Chang Hu, Denise Harnois, Elizabeth J. Carey, Andrea A. Gossard, Devin Oglesbee, John E. Eaton, Nicholas F. LaRusso, Gregory J. Gores, Tom H. Karlsen, Konstantinos N. Lazaridis

#### Table of Contents

| Pages | Item                   | Title                                                                                     |
|-------|------------------------|-------------------------------------------------------------------------------------------|
| 3-5   | Supplemental Methods   | Bile acid profile method and validation                                                   |
| 6-9   | Supplementary Table 1  | Bile acids in PSC patients and controls                                                   |
| 10-14 | Supplementary Table 2  | Bile acids in NN PSC patients and controls.                                               |
| 15-19 | Supplementary Table 3  | Bile acids in NN and NY PSC patients.                                                     |
| 20-24 | Supplementary Table 4  | Bile acids in HN and HY PSC patients.                                                     |
| 25-28 | Supplementary Table 5  | Bile acids in NN and HN PSC patients.                                                     |
| 29-32 | Supplementary Table 6  | Bile acids in NY and HY PSC patients.                                                     |
| 33-36 | Supplementary Table 7  | Bile acids in Control and No IBD PSC patients.                                            |
| 37-40 | Supplementary Table 8  | Bile acids in No IBD and UC PSC patients.                                                 |
| 41-44 | Supplementary Table 9  | Bile acids in No IBD and CD PSC patients.                                                 |
| 45-48 | Supplementary Table 10 | Bile acids in No IBD and Ind. IBD PSC patients.                                           |
| 49-52 | Supplementary Table 11 | Bile acids in cirrhotic and non-cirrhotic PSC patients                                    |
| 53-56 | Supplementary Table 12 | Bile acids in autoimmune hepatitis (AIH) overlap and non-overlap large duct PSC patients. |
| 57-60 | Supplementary Table 13 | Bile acids in small duct (SD) and large duct (LD) PSC patients.                           |
| 61-62 | Supplementary Table 14 | Univariate time to event analyses.                                                        |
| 63-64 | Supplementary Table 15 | Univariate event rate by quartiles analyses.                                              |
| 65    | Supplementary Table 16 | Variables and relative influence on GBM Model.                                            |

|       |                        |                                                             |
|-------|------------------------|-------------------------------------------------------------|
| 66-69 | Supplementary Table 17 | Bile acids in PSC patients: Der. and Val. cohorts.          |
| 70    | Supplementary Figure 1 | Bile acids by age in PSC and controls.                      |
| 71    | Supplementary Figure 2 | Bile acids by sex in PSC and controls.                      |
| 72    | Supplementary Figure 3 | Bile acids in controls and PSC patients by bile acid group. |
| 73    | Supplementary Figure 4 | Bile acids in cirrhotic and non-cirrhotic PSC patients      |
| 74    | Supplementary Figure 5 | BA correlation plots in PSC and controls.                   |
| 75    | Supplementary Figure 6 | Alternate GBM models using BA profiles                      |

---

## Supplemental Methods: Bile acid profile method and validation

### BA Profiling Method

Samples were prepared by precipitating matrix proteins with an acetonitrile/water (50/50) mixture containing deuterated internal standards at appropriate concentrations. Protein precipitate was removed by filtering through an AcroPrep 0.45  $\mu\text{m}$  GHP filter plate. The filtrate was diluted into water/methanol (80/20) solvent for injection into the LC-MS/MS system (ABSciex API 3200 LC-MS/MS with TurbolonSpray source, LEAP HTC Pal Autosampler, and a Shimadzu LC-20 AB Binary Pump) with an inline Poroshell 120 EC-C18, 2.1x50 mm, 2.7 micron column. Reverse-phase liquid chromatography was initiated with 42% mobile phase A (10 mM Ammonium Acetate in 95%Water/5% Methanol) and 58% mobile phase B (10 mM Ammonium Acetate in 99 % Methanol/ 1% Water) at 0.3 ml/min rate with a binary flow over 13 min. The MS/MS instrument collected 37 scheduled MRMs in negative ion mode with a 60 sec target window and a 0.8 sec scan time. Declustering potential (DP) ranged from -75 volts

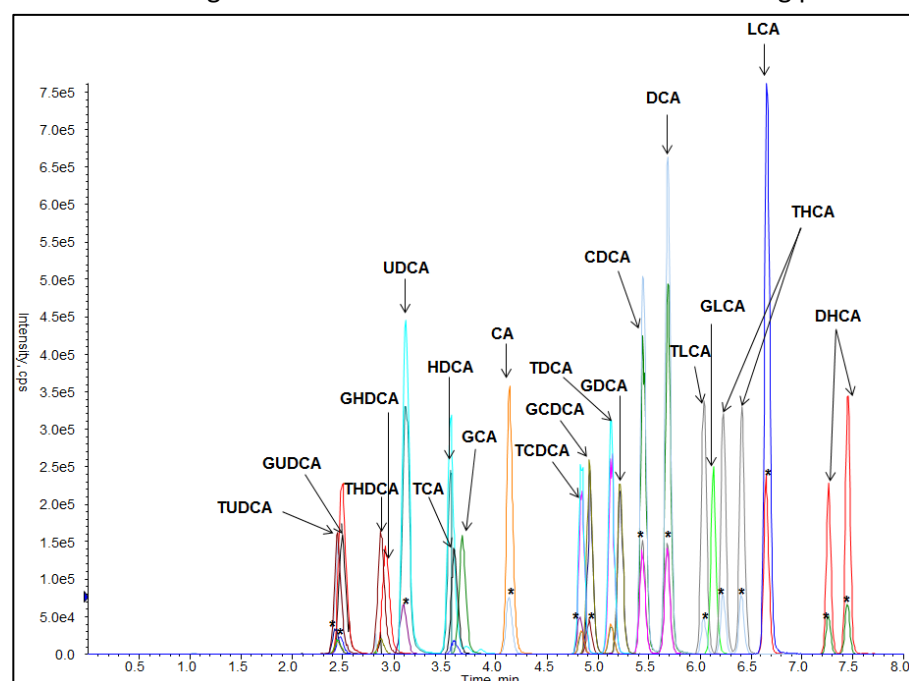

to -115 volts, collision energy potential (CEP) ranged from -20 to -30 volts, collision energy (CE) from -20 to -125 volts, and collision cell exit potential (CXP) ranged from -5 to -45 volts across the method. An example chromatogram is shown in **Methods Figure 1**. Analyte concentrations were derived from calculations in Analyst 1.6.2 and peak area ratios with internal labeled standards.

**Methods Figure 1.** A chromatogram with each measured BA analyte. Cholic Acid (CA), Chenodeoxycholic Acid (CDCA), Deoxycholic Acid (DCA), Ursodeoxycholic Acid (UDCA), Hyodeoxycholic Acid (HDCA), Lithocholic Acid (LCA), Glycocholic Acid (GCA), Glycochenodeoxycholic Acid (GCDCA), Glycodeoxycholic Acid (GDCA), Glycoursodeoxycholic Acid (GUDCA), Glycohyodeoxycholic Acid (GHDCa), Glycolithocholic Acid (GLCA), Taurocholic Acid (TCA), Taurochenodeoxycholic Acid (TCDCA), Taurodeoxycholic Acid (TDCA), Tauroursodeoxycholic Acid (TUDCA), Taurohyodeoxycholic Acid (THDCA), Taurolithocholic Acid (TLCA), Dihydroxycholestanic Acid (DHCA), Trihydroxycholestanic Acid (THCA). The asterisks (\*) indicate isotopically labeled internal standards for each analyte with the same retention time. This includes d4-Cholic Acid (CA-d4), d4-Chenodeoxycholic Acid (CDCA-d4), d4-Deoxycholic Acid (DCA-d4), d5-Ursodeoxycholic Acid (UDCA-d5), d4-Lithocholic Acid (LCA-d4), d4-Glycochenodeoxycholic Acid (GCDCA-d4), d5-Glycoursodeoxycholic Acid (GUDCA-d5), d5-Taurochenodeoxycholic Acid (TCDCA-d5),

d5-Tauroursodeoxycholic Acid (TUDCA-d5), d3-Dihydroxycholestanic Acid (DHCA-d3), and d3-Trihydroxycholestanic Acid (THCA-d3).

### Plasma and Serum Specimen Equivalency

Equivalency between serum and plasma BA analytical performance was shown previously. **Reference:** Max Scherer, Carsten Gnewuch, Gerd Schmitz, Gerhard Liebisch. Rapid quantification of bile acids and their conjugates in serum by liquid chromatography-tandem mass spectrometry. J Chromatogr B Analyt Technol Biomed Life Sci. 2009 Nov 15;877(3):3920-3925. PMID: 19819765.

### Bile Acid Profile Imprecision

Intra-assay imprecision of BA assay was performed with quality control specimens in matrix at low BA concentrations (QC 1) and high concentrations (QC 2) over 20 replicates in a single batch. Inter-assay imprecision was evaluated by preparing and analyzing a low (QC1) and high (QC2) control across 20 separate runs. The calculated coefficient of variation and mean concentrations for each analyte detected by these methods is shown in **Methods Table 1**.

**Methods Table 1.** BA profile Intra-assay and Inter-assay Imprecision

| Analyte | Intra-assay imprecision (N = 20 Specimens) |                          | Inter-assay imprecision (N = 20 Runs) |                          |
|---------|--------------------------------------------|--------------------------|---------------------------------------|--------------------------|
|         | QC1                                        | QC2                      | QC1                                   | QC2                      |
|         | CV (mean conc., $\mu$ M)                   | CV (mean conc., $\mu$ M) | CV (mean conc., $\mu$ M)              | CV (mean conc., $\mu$ M) |
| LCA     | 4.8% (0.80)                                | 4.2% (7.69)              | 9.6% (0.81)                           | 4.5% (7.51)              |
| CDCA    | 5.8% (1.18)                                | 4.2% (7.90)              | 21.0% (1.20)                          | 6.4% (7.53)              |
| DCA     | 5.1% (1.60)                                | 5.4% (8.43)              | 11.8% (1.59)                          | 8.2% (8.15)              |
| UDCA    | 5.0% (0.79)                                | 3.6% (7.07)              | 9.0% (0.79)                           | 8.4% (7.05)              |
| HDCA    | 18.5% (0.26)                               | 10.1% (2.50)             | 23.0% (0.29)                          | 25.8% (2.64)             |
| CA      | 4.9% (1.07)                                | 3.7% (7.41)              | 7.4% (1.08)                           | 4.5% (7.37)              |
| GLCA    | 11.1% (0.31)                               | 11.8% (3.15)             | 22.8% (0.38)                          | 22.6% (3.79)             |
| GCDCA   | 5.5% (3.16)                                | 4.5% (9.72)              | 10.3% (3.22)                          | 8.6% (9.56)              |
| GDCA    | 11.7% (0.88)                               | 9.4% (5.61)              | 15.6% (0.91)                          | 17.0% (5.76)             |
| GUDCA   | 7.0% (0.99)                                | 4.6% (7.44)              | 9.1% (1.00)                           | 6.9% (7.11)              |
| GHDCA   | 11.8% (0.31)                               | 11.5% (2.76)             | 29.2% (0.30)                          | 32.7% (2.54)             |
| GCA     | 6.2% (1.85)                                | 10.5% (9.32)             | 10.6% (1.78)                          | 14.2% (8.92)             |
| TLCA    | 18.6% (0.34)                               | 16.8% (3.80)             | 41.1% (0.45)                          | 52.1% (5.31)             |
| TCDCA   | 4.2% (1.21)                                | 4.3% (7.64)              | 7.6% (1.20)                           | 6.6% (7.39)              |
| TDCA    | 10.2% (0.41)                               | 9.4% (4.68)              | 29.1% (0.45)                          | 28.0% (4.73)             |
| TUDCA   | 4.8% (0.72)                                | 4.2% (6.86)              | 4.2% (0.72)                           | 5.3% (6.65)              |
| THDCA   | 11.0% (0.56)                               | 8.4% (6.26)              | 18.2% (0.49)                          | 27.0% (5.51)             |
| TCA     | 6.2% (0.92)                                | 11.2% (7.68)             | 14.7% (0.89)                          | 23.5% (7.40)             |
| DHCA    | 6.9% (0.82)                                | 4.5% (7.66)              | 22.2% (0.90)                          | 9.3% (7.11)              |
| THCA    | 9.0% (1.42)                                | 4.6% (8.24)              | 12.0% (1.47)                          | 4.8% (8.23)              |

### BA Profile Limit of Detection, Biological Limit of Detection and Linearity

The limit of detection (LOD) was determined by the analysis of 12 reagent blanks. The biological limit of detection (BLD) was determined by the analysis (N = 6) of a single serum specimen spiked with BA analyte concentrations near the LOD and measured in triplicate on two separate runs. Linearity was assessed by the analysis of 12-point analyte calibration curves (0.00, 0.05, 0.10, 0.20, 0.50, 1.0, 2.0, 5.0,

10.0, 20.0, 50.0, 100.0  $\mu\text{M}$ ), 5 times, inter-assay. An 11-point calibration curve with each analytical batch was necessary for BA quantitation as a few conjugated bile acids demonstrated correlation coefficients of 0.96-0.98. The LOD and BLD values and linearity results are shown in **Methods Table 2**.

**Methods Table 2.** Analytical Sensitivity and Linearity

| Analyte | LOD<br>( $\mu\text{M}$ ) | BLD<br>( $\mu\text{M}$ ) | Curve 1                    | Curve 2                    | Curve 3                    | Curve 4                    | Curve 5                    |
|---------|--------------------------|--------------------------|----------------------------|----------------------------|----------------------------|----------------------------|----------------------------|
|         |                          |                          | Correlation<br>Coefficient | Correlation<br>Coefficient | Correlation<br>Coefficient | Correlation<br>Coefficient | Correlation<br>Coefficient |
| LCA     | 0.00                     | 0.01                     | 0.99714                    | 0.99910                    | 0.99944                    | 0.99790                    | 0.99819                    |
| CDCA    | 0.00                     | 0.02                     | 0.99861                    | 0.99961                    | 0.99939                    | 0.99925                    | 0.99866                    |
| DCA     | 0.00                     | 0.02                     | 0.99776                    | 0.99819                    | 0.99788                    | 0.99748                    | 0.99828                    |
| UDCA    | 0.01                     | 0.02                     | 0.99974                    | 0.99977                    | 0.99918                    | 0.99958                    | 0.99954                    |
| HDCA    | 0.00                     | 0.01                     | 0.98951                    | 0.99365                    | 0.99310                    | 0.99533                    | 0.99575                    |
| CA      | 0.00                     | 0.00                     | 0.99793                    | 0.99895                    | 0.99870                    | 0.99770                    | 0.99783                    |
| GLCA    | 0.00                     | 0.02                     | 0.99115                    | 0.99709                    | 0.99449                    | 0.99407                    | 0.99757                    |
| GCDCA   | 0.00                     | 0.01                     | 0.99968                    | 0.99974                    | 0.99948                    | 0.99924                    | 0.99972                    |
| GDCA    | 0.00                     | 0.02                     | 0.98578                    | 0.99065                    | 0.98901                    | 0.98844                    | 0.99669                    |
| GUDCA   | 0.02                     | 0.03                     | 0.99950                    | 0.99927                    | 0.99765                    | 0.99896                    | 0.99715                    |
| GHDCA   | 0.00                     | 0.00                     | 0.98449                    | 0.98087                    | 0.98442                    | 0.98278                    | 0.99136                    |
| GCA     | 0.00                     | 0.02                     | 0.99602                    | 0.99848                    | 0.99804                    | 0.99748                    | 0.99924                    |
| TLCA    | 0.01                     | 0.01                     | 0.98667                    | 0.99129                    | 0.98845                    | 0.98842                    | 0.98399                    |
| TCDCA   | 0.00                     | 0.03                     | 0.99796                    | 0.99775                    | 0.99790                    | 0.99726                    | 0.99822                    |
| TDCA    | 0.00                     | 0.03                     | 0.98190                    | 0.99064                    | 0.96426                    | 0.96745                    | 0.98078                    |
| TUDCA   | 0.01                     | 0.03                     | 0.99955                    | 0.99908                    | 0.99938                    | 0.99847                    | 0.99962                    |
| THDCA   | 0.01                     | 0.02                     | 0.99761                    | 0.99440                    | 0.99238                    | 0.99298                    | 0.99269                    |
| TCA     | 0.00                     | 0.03                     | 0.99771                    | 0.99760                    | 0.99499                    | 0.99735                    | 0.99879                    |
| DHCA    | 0.00                     | 0.01                     | 0.97576                    | 0.98129                    | 0.97869                    | 0.97720                    | 0.97848                    |
| THCA    | 0.00                     | 0.23                     | 0.97297                    | 0.98018                    | 0.98044                    | 0.97546                    | 0.97733                    |

### BA Profile Specimen Dilution Limit

As patient specimens with BA concentrations above the analytical measurement range (AMR) of 100  $\mu\text{M}$  were expected for certain clinical conditions, dilutions limits for each BA analyte were determined by measuring 2 serum specimens spiked to an approximate concentration of 15  $\mu\text{M}$  for each bile acid. The spiked serum specimens were then diluted 2x, 5x, 10x, 20x, 25x, 40x, and 50x with water, and diluted solutions were carried through the analytical procedure. At a 2-fold dilution, the resulting %-difference from expected concentration was near, or less than, 20%. Beyond a 2-fold dilution, various conjugated bile acids resulted in significant overestimation (greater than 25%) of their original concentration. Therefore, it was concluded that only a 2x specimen dilution would yield acceptable BA calculated concentrations, which increased the effective AMR of the assay to 200  $\mu\text{M}$  for most BAs when completing a specimen dilution.

### Use of BA Profile Concentration Values in This Study

As our study is broadly based on comparing BA concentrations between relatively large groups we used the actual reported values for BA concentrations even when they were below the previously determined LOD or above the AMR. Low values approximate a concentration of zero, which could affect results of low-abundance bile acids such as the LCAs and HDCAs. Values above the AMR were only found for GUDCA in 4 of the 400 PSC patients and likely do not significantly impact our findings.

**Supplementary Table 1.** Bile acids in PSC patients and controls.

|                            | Control             | PSC                 | p-value | Con (n) | PSC (n) |
|----------------------------|---------------------|---------------------|---------|---------|---------|
| <b>Age in years</b>        |                     |                     |         |         |         |
| Median (IQR)               | 56.40 (48.49-65.29) | 48.44 (32.99-59.65) | <0.001  | 302     | 400     |
| Range                      | 19.28-86.12         | 10.13-80.48         |         |         |         |
| <b>Sex (% Male)</b>        | 58.3                | 57.8                | 0.888   | 302     | 400     |
| <b>Total BA</b>            |                     |                     |         |         |         |
| Median (IQR)               | 1.90 (1.02-3.52)    | 16.34 (6.04-44.31)  | <0.001  | 302     | 400     |
| Range                      | 0.19-17.79          | 0.54-646.47         |         |         |         |
| <b>CA (total)</b>          |                     |                     |         |         |         |
| Median (IQR)               | 0.22 (0.11-0.49)    | 2.09 (0.73-10.01)   | <0.001  | 302     | 400     |
| Range                      | 0.01-6.43           | 0.04-224.36         |         |         |         |
| <b>CA (unconjugated)</b>   |                     |                     |         |         |         |
| Median (IQR)               | 0.04 (0.02-0.12)    | 0.06 (0.03-0.22)    | <0.001  | 302     | 400     |
| Range                      | 0.00-5.23           | 0.00-10.65          |         |         |         |
| <b>GCA</b>                 |                     |                     |         |         |         |
| Median (IQR)               | 0.12 (0.05-0.25)    | 1.60 (0.44-6.12)    | <0.001  | 302     | 400     |
| Range                      | 0.01-5.84           | 0.01-165.50         |         |         |         |
| <b>TCA</b>                 |                     |                     |         |         |         |
| Median (IQR)               | 0.02 (0.01-0.04)    | 0.25 (0.06-2.44)    | <0.001  | 302     | 400     |
| Range                      | 0.00-1.50           | 0.00-58.61          |         |         |         |
| <b>CDCA (total)</b>        |                     |                     |         |         |         |
| Median (IQR)               | 0.63 (0.33-1.39)    | 4.09 (1.61-9.81)    | <0.001  | 302     | 400     |
| Range                      | 0.05-10.77          | 0.10-268.56         |         |         |         |
| <b>CDCA (unconjugated)</b> |                     |                     |         |         |         |
| Median (IQR)               | 0.07 (0.03-0.23)    | 0.15 (0.05-0.46)    | <0.001  | 302     | 400     |
| Range                      | 0.00-5.28           | 0.00-14.78          |         |         |         |
| <b>GCDCA</b>               |                     |                     |         |         |         |
| Median (IQR)               | 0.42 (0.21-0.88)    | 2.87 (1.10-6.90)    | <0.001  | 302     | 400     |
| Range                      | 0.02-5.38           | 0.02-214.48         |         |         |         |
| <b>TCDCA</b>               |                     |                     |         |         |         |
| Median (IQR)               | 0.05 (0.03-0.11)    | 0.47 (0.13-2.12)    | <0.001  | 302     | 400     |
| Range                      | 0.00-2.49           | 0.00-52.46          |         |         |         |
| <b>DCA (total)</b>         |                     |                     |         |         |         |
| Median (IQR)               | 0.65 (0.36-1.21)    | 0.66 (0.03-1.76)    | 0.328   | 302     | 400     |
| Range                      | 0.00-8.26)          | 0.00-24.36          |         |         |         |
| <b>DCA (unconjugated)</b>  |                     |                     |         |         |         |
| Median (IQR)               | 0.33 (0.19-0.58)    | 0.10 (0.01-0.44)    | <0.001  | 302     | 400     |
| Range                      | 0.00-4.49           | 0.00-5.99           |         |         |         |

|                            | Control          | PSC               | p-value | Con (n) | PSC (n) |
|----------------------------|------------------|-------------------|---------|---------|---------|
| <b>GDCA</b>                |                  |                   |         |         |         |
| Median (IQR)               | 0.21 (0.10-0.46) | 0.28 (0.02-0.96)  | 0.339   | 302     | 400     |
| Range                      | 0.00-5.94        | 0.00-15.49        |         |         |         |
| <b>TDCA</b>                |                  |                   |         |         |         |
| Median (IQR)               | 0.04 (0.02-0.08) | 0.06 (0.00-0.27)  | 0.013   | 302     | 400     |
| Range                      | 0.00-1.13        | 0.00-8.55         |         |         |         |
| <b>LCA (total)</b>         |                  |                   |         |         |         |
| Median (IQR)               | 0.03 (0.02-0.05) | 0.04 (0.00-0.15)  | 0.037   | 302     | 400     |
| Range                      | 0.00-0.42        | 0.00-2.85         |         |         |         |
| <b>LCA (unconjugated)</b>  |                  |                   |         |         |         |
| Median (IQR)               | 0.01 (0.01-0.02) | 0.01 (0.00-0.04)  | 0.512   | 302     | 400     |
| Range                      | 0.00-0.21        | 0.00-0.96         |         |         |         |
| <b>GLCA</b>                |                  |                   |         |         |         |
| Median (IQR)               | 0.01 (0.01-0.02) | 0.02 (0.00-0.09)  | 0.002   | 302     | 400     |
| Range                      | 0.00-0.19        | 0.00-2.14         |         |         |         |
| <b>TLCA</b>                |                  |                   |         |         |         |
| Median (IQR)               | 0.00 (0.00-0.01) | 0.00 (0.00-0.02)  | <0.001  | 302     | 400     |
| Range                      | 0.00-0.07        | 0.00-0.56)        |         |         |         |
| <b>HDCA (total)</b>        |                  |                   |         |         |         |
| Median (IQR)               | 0.03 (0.01-0.05) | 0.01 (0.00-0.04)  | <0.001  | 302     | 400     |
| Range                      | 0.00-0.29        | 0.00-0.73         |         |         |         |
| <b>HDCA (unconjugated)</b> |                  |                   |         |         |         |
| Median (IQR)               | 0.02 (0.01-0.03) | 0.01 (0.00-0.02)  | <0.001  | 302     | 400     |
| Range                      | 0.00-0.11        | 0.00-0.24         |         |         |         |
| <b>GHDCA</b>               |                  |                   |         |         |         |
| Median (IQR)               | 0.00 (0.00-0.01) | 0.00 (0.00-0.01)  | <0.001  | 302     | 400     |
| Range                      | 0.00-0.11        | 0.00-0.73         |         |         |         |
| <b>THDCA</b>               |                  |                   |         |         |         |
| Median (IQR)               | 0.00 (0.00-0.00) | 0.00 (0.00-0.00)  | 0.007   | 302     | 400     |
| Range                      | 0.00-0.09        | 0.00-0.07         |         |         |         |
| <b>UDCA (total)</b>        |                  |                   |         |         |         |
| Median (IQR)               | 0.13 (0.07-0.27) | 1.95 (0.19-18.27) | <0.001  | 302     | 400     |
| Range                      | 0.00-2.15        | 0.00-537.71       |         |         |         |
| <b>UDCA (unconjugated)</b> |                  |                   |         |         |         |
| Median (IQR)               | 0.02 (0.01-0.06) | 0.17 (0.01-2.02)  | <0.001  | 302     | 400     |
| Range                      | 0.00-0.92        | 0.00-52.33        |         |         |         |
| <b>GUDCA</b>               |                  |                   |         |         |         |
| Median (IQR)               | 0.09 (0.05-0.19) | 1.53 (0.12-13.52) | <0.001  | 302     | 400     |
| Range                      | 0.00-1.78        | 0.00-472.47       |         |         |         |

|                               | Control           | PSC               | p-value | Con (n) | PSC (n) |
|-------------------------------|-------------------|-------------------|---------|---------|---------|
| <b>TUDCA</b>                  |                   |                   |         |         |         |
| Median (IQR)                  | 0.01 (0.00-0.01)  | 0.09 (0.01-0.52)  | <0.001  | 302     | 400     |
| Range                         | 0.00-0.25         | 0.00-51.06        |         |         |         |
| <b>Total BA (conj. frac.)</b> |                   |                   |         |         |         |
| Median (IQR)                  | 0.64 (0.49-0.79)  | 0.91 (0.74-0.98)  | <0.001  | 302     | 400     |
| Range                         | 0.11-0.97         | 0.13-1.00         |         |         |         |
| <b>CA (conj. frac.)</b>       |                   |                   |         |         |         |
| Median (IQR)                  | 0.75 (0.53-0.89)  | 0.97 (0.85-0.99)  | <0.001  | 302     | 400     |
| Range                         | 0.21-1.00         | 0.09-1.00         |         |         |         |
| <b>CDCA (conj. frac.)</b>     |                   |                   |         |         |         |
| Median (IQR)                  | 0.87 (0.70-0.94)  | 0.95 (0.83-0.99)  | <0.001  | 302     | 400     |
| Range                         | 0.19-1.00         | 0.12-1.00         |         |         |         |
| <b>DCA (conj. frac.)</b>      |                   |                   |         |         |         |
| Median (IQR)                  | 0.44 (0.29-0.60)  | 0.80 (0.52-0.95)  | <0.001  | 299     | 345     |
| Range                         | 0.00-1.00         | 0.00-1.00         |         |         |         |
| <b>LCA (conj. frac.)</b>      |                   |                   |         |         |         |
| Median (IQR)                  | 0.50 (0.40-0.69)  | 0.75 (0.56-0.87)  | <0.001  | 274     | 286     |
| Range                         | 0.00-1.00         | 0.00-1.00         |         |         |         |
| <b>HDCA (conj. frac.)</b>     |                   |                   |         |         |         |
| Median (IQR)                  | 0.20 (0.00-0.50)  | 1.22 (0.00-0.55)  | 0.106   | 261     | 231     |
| Range                         | 0.00-1.00         | 0.00-1.00         |         |         |         |
| <b>UDCA (conj. frac.)</b>     |                   |                   |         |         |         |
| Median (IQR)                  | 0.83 (0.67-0.94)  | 0.90 (0.75-0.97)  | 0.001   | 301     | 392     |
| Range                         | 0.00-1.00         | 0.00-1.00         |         |         |         |
| <b>Total BA (G:T ratio)</b>   |                   |                   |         |         |         |
| Median (IQR)                  | 7.66 (4.89-11.17) | 8.36 (3.57-17.44) | 0.320   | 300     | 399     |
| Range                         | 0.91-139.00       | 0.37-93.11        |         |         |         |
| <b>CA (G:T ratio)</b>         |                   |                   |         |         |         |
| Median (IQR)                  | 6.00 (3.50-9.00)  | 5.56 (2.72-9.23)  | 0.180   | 263     | 393     |
| Range                         | 0.83-31.00        | 0.27-70.33        |         |         |         |
| <b>CDCA (G:T ratio)</b>       |                   |                   |         |         |         |
| Median (IQR)                  | 8.00 (5.33-12.14) | 5.76 (2.80-10.30) | <0.001  | 298     | 399     |
| Range                         | 1.00-100.00       | 0.36-92.17        |         |         |         |
| <b>DCA (G:T ratio)</b>        |                   |                   |         |         |         |
| Median (IQR)                  | 5.50 (3.74-8.00)  | 4.90 (2.13-8.26)  | 0.007   | 272     | 292     |
| Range                         | 0.50-61.00        | 0.22-45.00        |         |         |         |
| <b>LCA (G:T ratio)</b>        |                   |                   |         |         |         |
| Median (IQR)                  | 2.00 (1.00-4.25)  | 3.00 (1.40-6.22)  | 0.061   | 79      | 169     |
| Range                         | 0.50-13.00        | 0.10-36.00        |         |         |         |



|                             | Control            | PSC                | p-value | Con (n) | PSC (n) |
|-----------------------------|--------------------|--------------------|---------|---------|---------|
| <b>HDCA (G:T ratio)</b>     |                    |                    |         |         |         |
| Median (IQR)                | 1.22 (1.00-3.00)   | 1.17 (1.00-1.88)   | 0.666   | 5       | 12      |
| Range                       | 1.00-4.00          | 0.71-11.00         |         |         |         |
| <b>UDCA (G:T ratio)</b>     |                    |                    |         |         |         |
| Median (IQR)                | 10.00 (5.00-18.00) | 18.40 (7.25-35.75) | <0.001  | 177     | 330     |
| Range                       | 1.00-95.00         | 0.14-145.00        |         |         |         |
| <b>CA (frac. BA pool)</b>   |                    |                    |         |         |         |
| Median (IQR)                | 0.13 (0.08-0.18)   | 0.18 (0.08-0.36)   | <0.001  | 302     | 400     |
| Range                       | 0.02-0.55          | 0.01-0.79          |         |         |         |
| <b>CDCA (frac. BA pool)</b> |                    |                    |         |         |         |
| Median (IQR)                | 0.35 (0.27-0.45)   | 0.26 (0.15-0.46)   | <0.001  | 302     | 400     |
| Range                       | 0.06-0.75          | 0.04-0.93          |         |         |         |
| <b>DCA (frac. BA pool)</b>  |                    |                    |         |         |         |
| Median (IQR)                | 0.37 (0.24-0.47)   | 0.04 (0.01-0.14)   | <0.001  | 302     | 400     |
| Range                       | 0.00-0.78          | 0.00-0.64          |         |         |         |
| <b>LCA (frac. BA pool)</b>  |                    |                    |         |         |         |
| Median (IQR)                | 0.02 (0.01-0.03)   | 0.01 (0.00-0.01)   | <0.001  | 302     | 400     |
| Range                       | 0.00-0.13          | 0.00-0.12          |         |         |         |
| <b>HDCA (frac. BA pool)</b> |                    |                    |         |         |         |
| Median (IQR)                | 0.01 (0.01-0.02)   | 0.00 (0.00-0.01)   | <0.001  | 302     | 400     |
| Range                       | 0.00-0.14          | 0.00-0.05          |         |         |         |
| <b>UDCA (frac. BA pool)</b> |                    |                    |         |         |         |
| Median (IQR)                | 0.07 (0.04-0.12)   | 0.18 (0.02-0.66)   | <0.001  | 302     | 400     |
| Range                       | 0.00-0.39          | 0.00-0.91          |         |         |         |
| <b>CA:CDCA ratio</b>        |                    |                    |         |         |         |
| Median (IQR)                | 0.38 (0.24-0.54)   | 0.60 (0.35-1.12)   | <0.001  | 302     | 400     |
| Range                       | 0.06-3.10          | 0.05-5.26          |         |         |         |
| <b>CA:DCA ratio</b>         |                    |                    |         |         |         |
| Median (IQR)                | 0.36 (0.19-0.73)   | 2.60 (0.79-26.43)  | <0.001  | 299     | 345     |
| Range                       | 0.04-103.00        | 0.09-3796.67       |         |         |         |
| <b>CDCA:LCA+HDCA+UDCA</b>   |                    |                    |         |         |         |
| Median (IQR)                | 3.00 (1.78-5.07)   | 1.57 (0.22-13.81)  | 0.001   | 302     | 392     |
| Range                       | 0.44-35.00         | 0.04-1310.00       |         |         |         |

**Supplementary Table 2.** Bile acids in NN PSC patients and controls.

|                            | Control             | NN PSC              | p-value | Con (n) | NN PSC (n) |
|----------------------------|---------------------|---------------------|---------|---------|------------|
| <b>Age in years</b>        |                     |                     |         |         |            |
| Median (IQR)               | 56.40 (48.49-65.29) | 51.14 (32.76-61.38) | <0.001  | 302     | 137        |
| Range                      | 19.28-86.12         | 11.82-78.53         |         |         |            |
| <b>Sex (% Male)</b>        | 58.3                | 59.1                | 0.868   | 302     | 137        |
| <b>Total BA</b>            |                     |                     |         |         |            |
| Median (IQR)               | 1.90 (1.02-3.52)    | 4.98 (2.45-8.50)    | <0.001  | 302     | 137        |
| Range                      | 0.19-17.79          | 0.59-16.35          |         |         |            |
| <b>CA (total)</b>          |                     |                     |         |         |            |
| Median (IQR)               | 0.22 (0.11-0.49)    | 1.00 (0.46-2.12)    | <0.001  | 302     | 137        |
| Range                      | 0.01-6.43           | 0.04-10.09          |         |         |            |
| <b>CA (unconjugated)</b>   |                     |                     |         |         |            |
| Median (IQR)               | 0.04 (0.02-0.12)    | 0.07 (0.03-0.23)    | <0.001  | 302     | 137        |
| Range                      | 0.00-5.23           | 0.00-2.99           |         |         |            |
| <b>GCA</b>                 |                     |                     |         |         |            |
| Median (IQR)               | 0.12 (0.05-0.25)    | 0.52 (0.27-1.44)    | <0.001  | 302     | 137        |
| Range                      | 0.01-5.84           | 0.02-6.74           |         |         |            |
| <b>TCA</b>                 |                     |                     |         |         |            |
| Median (IQR)               | 0.02 (0.01-0.04)    | 0.09 (0.04-0.34)    | <0.001  | 302     | 137        |
| Range                      | 0.00-1.50           | 0.00-3.67           |         |         |            |
| <b>CDCA (total)</b>        |                     |                     |         |         |            |
| Median (IQR)               | 0.63 (0.33-1.39)    | 2.14 (1.22-4.11)    | <0.001  | 302     | 137        |
| Range                      | 0.05-10.77          | 0.16-10.18          |         |         |            |
| <b>CDCA (unconjugated)</b> |                     |                     |         |         |            |
| Median (IQR)               | 0.07 (0.03-0.23)    | 0.14 (0.05-0.46)    | <0.001  | 302     | 137        |
| Range                      | 0.00-5.28           | 0.00-5.23           |         |         |            |
| <b>GCDCA</b>               |                     |                     |         |         |            |
| Median (IQR)               | 0.42 (0.21-0.88)    | 1.47 (0.69-2.44)    | <0.001  | 302     | 137        |
| Range                      | 0.02-5.38           | 0.10-8.29           |         |         |            |
| <b>TCDC</b>                |                     |                     |         |         |            |
| Median (IQR)               | 0.05 (0.03-0.11)    | 0.20 (0.08-0.61)    | <0.001  | 302     | 137        |
| Range                      | 0.00-2.49           | 0.00-3.25           |         |         |            |
| <b>DCA (total)</b>         |                     |                     |         |         |            |
| Median (IQR)               | 0.65 (0.36-1.21)    | 0.39 (0.00-1.26)    | <0.001  | 302     | 137        |
| Range                      | 0.00-8.26)          | 0.00-7.81           |         |         |            |
| <b>DCA (unconjugated)</b>  |                     |                     |         |         |            |
| Median (IQR)               | 0.33 (0.19-0.58)    | 0.09 (0.00-0.40)    | <0.001  | 302     | 137        |
| Range                      | 0.00-4.49           | 0.00-5.99           |         |         |            |

|                            | Control          | NN PSC           | p-value | Con (n) | NN PSC (n) |
|----------------------------|------------------|------------------|---------|---------|------------|
| <b>GDCA</b>                |                  |                  |         |         |            |
| Median (IQR)               | 0.21 (0.10-0.46) | 0.13 (0.00-0.56) | 0.004   | 302     | 137        |
| Range                      | 0.00-5.94        | 0.00-2.41        |         |         |            |
| <b>TDCA</b>                |                  |                  |         |         |            |
| Median (IQR)               | 0.04 (0.02-0.08) | 0.03 (0.00-0.12) | 0.067   | 302     | 137        |
| Range                      | 0.00-1.13        | 0.00-1.35        |         |         |            |
| <b>LCA (total)</b>         |                  |                  |         |         |            |
| Median (IQR)               | 0.03 (0.02-0.05) | 0.02 (0.00-0.06) | <0.001  | 302     | 137        |
| Range                      | 0.00-0.42        | 0.00-1.18        |         |         |            |
| <b>LCA (unconjugated)</b>  |                  |                  |         |         |            |
| Median (IQR)               | 0.01 (0.01-0.02) | 0.00 (0.00-0.02) | <0.001  | 302     | 137        |
| Range                      | 0.00-0.21        | 0.00-0.41        |         |         |            |
| <b>GLCA</b>                |                  |                  |         |         |            |
| Median (IQR)               | 0.01 (0.01-0.02) | 0.01 (0.00-0.04) | 0.022   | 302     | 137        |
| Range                      | 0.00-0.19        | 0.00-0.71        |         |         |            |
| <b>TLCA</b>                |                  |                  |         |         |            |
| Median (IQR)               | 0.00 (0.00-0.01) | 0.00 (0.00-0.00) | 0.367   | 302     | 137        |
| Range                      | 0.00-0.07        | 0.00-0.06        |         |         |            |
| <b>HDCA (total)</b>        |                  |                  |         |         |            |
| Median (IQR)               | 0.03 (0.01-0.05) | 0.01 (0.00-0.04) | <0.001  | 302     | 137        |
| Range                      | 0.00-0.29        | 0.00-0.41        |         |         |            |
| <b>HDCA (unconjugated)</b> |                  |                  |         |         |            |
| Median (IQR)               | 0.02 (0.01-0.03) | 0.01 (0.00-0.02) | <0.001  | 302     | 137        |
| Range                      | 0.00-0.11        | 0.00-0.24        |         |         |            |
| <b>GHDCA</b>               |                  |                  |         |         |            |
| Median (IQR)               | 0.00 (0.00-0.01) | 0.00 (0.00-0.01) | 0.002   | 302     | 137        |
| Range                      | 0.00-0.11        | 0.00-0.17        |         |         |            |
| <b>THDCA</b>               |                  |                  |         |         |            |
| Median (IQR)               | 0.00 (0.00-0.00) | 0.00 (0.00-0.00) | 0.158   | 302     | 137        |
| Range                      | 0.00-0.09        | 0.00-0.02        |         |         |            |
| <b>UDCA (total)</b>        |                  |                  |         |         |            |
| Median (IQR)               | 0.13 (0.07-0.27) | 0.13 (0.03-0.33) | 0.280   | 302     | 137        |
| Range                      | 0.00-2.15        | 0.00-1.98        |         |         |            |
| <b>UDCA (unconjugated)</b> |                  |                  |         |         |            |
| Median (IQR)               | 0.02 (0.01-0.06) | 0.01 (0.00-0.06) | 0.106   | 302     | 137        |
| Range                      | 0.00-0.92        | 0.00-0.83        |         |         |            |
| <b>GUDCA</b>               |                  |                  |         |         |            |
| Median (IQR)               | 0.09 (0.05-0.19) | 0.09 (0.03-0.22) | 0.234   | 302     | 137        |
| Range                      | 0.00-1.78        | 0.00-1.71        |         |         |            |

|                               | Control           | NN PSC            | p-value | Con (n) | NN PSC (n) |
|-------------------------------|-------------------|-------------------|---------|---------|------------|
| <b>TUDCA</b>                  |                   |                   |         |         |            |
| Median (IQR)                  | 0.01 (0.00-0.01)  | 0.01 (0.00-0.02)  | 0.742   | 302     | 137        |
| Range                         | 0.00-0.25         | 0.00-0.17         |         |         |            |
| <b>Total BA (conj. frac.)</b> |                   |                   |         |         |            |
| Median (IQR)                  | 0.64 (0.49-0.79)  | 0.86 (0.62-0.94)  | <0.001  | 302     | 137        |
| Range                         | 0.11-0.97         | 0.13-1.00         |         |         |            |
| <b>CA (conj. frac.)</b>       |                   |                   |         |         |            |
| Median (IQR)                  | 0.75 (0.53-0.89)  | 0.89 (0.67-0.97)  | <0.001  | 302     | 137        |
| Range                         | 0.02-1.00         | 0.09-1.00         |         |         |            |
| <b>CDCA (conj. frac.)</b>     |                   |                   |         |         |            |
| Median (IQR)                  | 0.87 (0.70-0.94)  | 0.93 (0.76-0.98)  | 0.003   | 302     | 137        |
| Range                         | 0.19-1.00         | 0.12-1.00         |         |         |            |
| <b>DCA (conj. frac.)</b>      |                   |                   |         |         |            |
| Median (IQR)                  | 0.44 (0.29-0.60)  | 0.66 (0.38-0.83)  | <0.001  | 299     | 102        |
| Range                         | 0.00-1.00         | 0.00-1.00         |         |         |            |
| <b>LCA (conj. frac.)</b>      |                   |                   |         |         |            |
| Median (IQR)                  | 0.50 (0.40-0.69)  | 0.70 (0.50-0.86)  | <0.001  | 274     | 80         |
| Range                         | 0.00-1.00         | 0.00-1.00         |         |         |            |
| <b>HDCA (conj. frac.)</b>     |                   |                   |         |         |            |
| Median (IQR)                  | 0.20 (0.00-0.50)  | 0.26 (0.00-0.50)  | 0.582   | 261     | 76         |
| Range                         | 0.00-1.00         | 0.00-1.00         |         |         |            |
| <b>UDCA (conj. frac.)</b>     |                   |                   |         |         |            |
| Median (IQR)                  | 0.83 (0.67-0.94)  | 0.88 (0.69-0.97)  | 0.239   | 301     | 129        |
| Range                         | 0.00-1.00         | 0.00-1.00         |         |         |            |
| <b>Total BA (G:T ratio)</b>   |                   |                   |         |         |            |
| Median (IQR)                  | 7.66 (4.89-11.17) | 6.60 (3.59-10.24) | 0.063   | 300     | 136        |
| Range                         | 0.91-139.00       | 0.58-93.11        |         |         |            |
| <b>CA (G:T ratio)</b>         |                   |                   |         |         |            |
| Median (IQR)                  | 6.00 (3.50-9.00)  | 6.00 (3.60-9.38)  | 0.851   | 263     | 135        |
| Range                         | 0.83-31.00        | 0.50-70.33        |         |         |            |
| <b>CDCA (G:T ratio)</b>       |                   |                   |         |         |            |
| Median (IQR)                  | 8.00 (5.33-12.13) | 6.53 (3.34-11.17) | 0.012   | 298     | 136        |
| Range                         | 1.00-100.00       | 0.38-92.17        |         |         |            |
| <b>DCA (G:T ratio)</b>        |                   |                   |         |         |            |
| Median (IQR)                  | 5.50 (3.74-8.00)  | 5.09 (2.54-8.00)  | 0.133   | 272     | 83         |
| Range                         | 0.50-61.00        | 0.30-44.50        |         |         |            |
| <b>LCA (G:T ratio)</b>        |                   |                   |         |         |            |
| Median (IQR)                  | 2.00 (1.00-4.25)  | 2.58 (1.08-6.75)  | 0.363   | 79      | 30         |
| Range                         | 0.50-13.00        | 0.50-17.00        |         |         |            |

|                                | Control            | NN PSC             | p-value | Con (n) | NN PSC (n) |
|--------------------------------|--------------------|--------------------|---------|---------|------------|
| <b>HDCA (G:T ratio)</b>        |                    |                    |         |         |            |
| Median (IQR)                   | 1.22 (1.00-3.00)   | 3.50 (3.25-3.75)   | 0.232   | 5       | 2          |
| Range                          | 1.00-4.00          | 3.00-4.00          |         |         |            |
| <b>UDCA (G:T ratio)</b>        |                    |                    |         |         |            |
| Median (IQR)                   | 10.00 (5.00-18.00) | 10.50 (5.00-22.00) | 0.833   | 177     | 73         |
| Range                          | 1.00-95.00         | 0.71-124.00        |         |         |            |
| <b>CA (frac. BA pool)</b>      |                    |                    |         |         |            |
| Median (IQR)                   | 0.13 (0.08-0.17)   | 0.25 (0.17-0.38)   | <0.001  | 302     | 137        |
| Range                          | 0.02-0.55          | 0.04-0.79          |         |         |            |
| <b>CDCA (frac. BA pool)</b>    |                    |                    |         |         |            |
| Median (IQR)                   | 0.35 (0.27-0.45)   | 0.48 (0.38-0.61)   | <0.001  | 302     | 137        |
| Range                          | 0.06-0.75          | 0.14-0.93          |         |         |            |
| <b>DCA (frac. BA pool)</b>     |                    |                    |         |         |            |
| Median (IQR)                   | 0.37 (0.24-0.47)   | 0.11 (0.00-0.26)   | <0.001  | 302     | 137        |
| Range                          | 0.00-0.78          | 0.00-0.64          |         |         |            |
| <b>LCA (frac. BA pool)</b>     |                    |                    |         |         |            |
| Median (IQR)                   | 0.02 (0.01-0.03)   | 0.00 (0.00-0.01)   | <0.001  | 302     | 137        |
| Range                          | 0.00-0.13          | 0.00-0.12          |         |         |            |
| <b>HDCA (frac. BA pool)</b>    |                    |                    |         |         |            |
| Median (IQR)                   | 0.01 (0.01-0.02)   | 0.00 (0.00-0.01)   | <0.001  | 302     | 137        |
| Range                          | 0.00-0.14          | 0.00-0.05          |         |         |            |
| <b>UDCA (frac. BA pool)</b>    |                    |                    |         |         |            |
| Median (IQR)                   | 0.07 (0.04-0.12)   | 0.03 (0.01-0.07)   | <0.001  | 302     | 137        |
| Range                          | 0.00-0.39          | 0.00-0.29          |         |         |            |
| <b>CA:CDCA ratio</b>           |                    |                    |         |         |            |
| Median (IQR)                   | 0.38 (0.24-0.54)   | 0.50 (0.31-0.80)   | <0.001  | 302     | 137        |
| Range                          | 0.06-3.10          | 0.07-3.77          |         |         |            |
| <b>CA:DCA ratio</b>            |                    |                    |         |         |            |
| Median (IQR)                   | 0.36 (0.19-0.73)   | 1.16 (0.45-5.25)   | <0.001  | 299     | 102        |
| Range                          | 0.04-103.00        | 0.09-822.00        |         |         |            |
| <b>CDCA:LCA+HDCA+UDCA</b>      |                    |                    |         |         |            |
| Median (IQR)                   | 3.00 (1.78-5.07)   | 9.33 (4.00-23.00)  | <0.001  | 302     | 129        |
| Range                          | 0.44-35.00         | 0.66-422.00        |         |         |            |
| <b>Total BA*</b>               |                    |                    |         |         |            |
| Median (IQR)                   | 1.72 (0.94-3.24)   | 4.54 (2.37-7.83)   | <0.001  | 302     | 137        |
| Range                          | 0.19-16.79         | 0.59-16.10         |         |         |            |
| <b>Total BA (conj. frac.)*</b> |                    |                    |         |         |            |
| Median (IQR)                   | 0.62 (0.47-0.78)   | 0.85 (0.61-0.94)   | <0.001  | 302     | 137        |
| Range                          | 0.10-0.97          | 0.12-1.00          |         |         |            |

|                              | Control           | NN PSC            | p-value | Con (n) | NN PSC (n) |
|------------------------------|-------------------|-------------------|---------|---------|------------|
| <b>Total BA (G:T ratio)*</b> |                   |                   |         |         |            |
| Median (IQR)                 | 7.26 (4.62-10.56) | 6.43 (3.48-10.00) | 0.105   | 300     | 136        |
| Range                        | 0.89-119.00       | 0.58-90.89        |         |         |            |
| <b>CA (frac. BA pool)*</b>   |                   |                   |         |         |            |
| Median (IQR)                 | 0.14 (0.09-0.19)  | 0.25 (0.18-0.39)  | <0.001  | 302     | 137        |
| Range                        | 0.03-0.56         | 0.04-0.79         |         |         |            |
| <b>CDCA (frac. BA pool)*</b> |                   |                   |         |         |            |
| Median (IQR)                 | 0.38 (0.29-0.49)  | 0.51 (0.40-0.65)  | <0.001  | 302     | 137        |
| Range                        | 0.06-0.91         | 0.14-0.93         |         |         |            |
| <b>DCA (frac. BA pool)*</b>  |                   |                   |         |         |            |
| Median (IQR)                 | 0.41 (0.27-0.53)  | 0.12 (0.00-0.29)  | <0.001  | 302     | 137        |
| Range                        | 0.00-0.81         | 0.00-0.65         |         |         |            |
| <b>LCA (frac. BA pool)*</b>  |                   |                   |         |         |            |
| Median (IQR)                 | 0.02 (0.01-0.03)  | 0.00 (0.00-0.01)  | <0.001  | 302     | 137        |
| Range                        | 0.00-0.13         | 0.00-0.12         |         |         |            |
| <b>HDCA (frac. BA pool)*</b> |                   |                   |         |         |            |
| Median (IQR)                 | 0.01 (0.01-0.03)  | 0.00 (0.00-0.01)  | <0.001  | 302     | 137        |
| Range                        | 0.00-0.16         | 0.00-0.06         |         |         |            |

\*Values with UDCA and its conjugated forms (GUDCA and TUDCA) removed from the analysis;  
 NN PSC: Normal total bile acids, No UDCA treatment

**Supplementary Table 3.** Bile acids in NN and NY PSC patients.

|                            | NN PSC              | NY PSC              | p-value | NN PSC (n) | NY PSC (n) |
|----------------------------|---------------------|---------------------|---------|------------|------------|
| <b>Age in years</b>        |                     |                     |         |            |            |
| Median (IQR)               | 51.14 (32.76-61.38) | 43.92 (33.74-54.55) | 0.058   | 137        | 61         |
| Range                      | 11.82-78.53         | 10.13-72.71         |         |            |            |
| <b>Sex (% Male)</b>        | 59.1                | 50.8                | 0.276   | 137        | 61         |
| <b>Total BA</b>            |                     |                     |         |            |            |
| Median (IQR)               | 4.98 (2.45-8.50)    | 9.79 (6.73-14.02)   | <0.001  | 137        | 61         |
| Range                      | 0.59-16.35          | 3.06-17.51          |         |            |            |
| <b>CA (total)</b>          |                     |                     |         |            |            |
| Median (IQR)               | 1.00 (0.46-2.12)    | 0.60 (0.31-1.28)    | 0.002   | 137        | 61         |
| Range                      | 0.04-10.09          | 0.04-5.47           |         |            |            |
| <b>CA (unconjugated)</b>   |                     |                     |         |            |            |
| Median (IQR)               | 0.07 (0.03-0.23)    | 0.04 (0.02-0.15)    | 0.018   | 137        | 61         |
| Range                      | 0.00-2.99           | 0.00-0.90           |         |            |            |
| <b>GCA</b>                 |                     |                     |         |            |            |
| Median (IQR)               | 0.52 (0.27-1.44)    | 0.35 (0.18-0.88)    | 0.032   | 137        | 61         |
| Range                      | 0.02-6.74           | 0.03-4.77           |         |            |            |
| <b>TCA</b>                 |                     |                     |         |            |            |
| Median (IQR)               | 0.09 (0.04-0.34)    | 0.05 (0.02-0.13)    | <0.001  | 137        | 61         |
| Range                      | 0.00-3.67           | 0.00-0.66           |         |            |            |
| <b>CDCA (total)</b>        |                     |                     |         |            |            |
| Median (IQR)               | 2.14 (1.22-4.11)    | 1.19 (0.73-1.92)    | <0.001  | 137        | 61         |
| Range                      | 0.16-10.18          | 0.18-4.58           |         |            |            |
| <b>CDCA (unconjugated)</b> |                     |                     |         |            |            |
| Median (IQR)               | 0.14 (0.05-0.46)    | 0.17 (0.07-0.44)    | 0.688   | 137        | 61         |
| Range                      | 0.00-5.23           | 0.01-1.73           |         |            |            |
| <b>GCDCA</b>               |                     |                     |         |            |            |
| Median (IQR)               | 1.47 (0.69-2.44)    | 0.85 (0.50-1.24)    | <0.001  | 137        | 61         |
| Range                      | 0.10-8.29           | 0.10-3.39           |         |            |            |
| <b>TCDCA</b>               |                     |                     |         |            |            |
| Median (IQR)               | 0.20 (0.08-0.61)    | 0.07 (0.04-0.18)    | <0.001  | 137        | 61         |
| Range                      | 0.00-3.25           | 0.01-0.79           |         |            |            |
| <b>DCA (total)</b>         |                     |                     |         |            |            |
| Median (IQR)               | 0.39 (0.00-1.26)    | 0.62 (0.09-1.22)    | 0.353   | 137        | 61         |
| Range                      | 0.00-7.81           | 0.00-3.35           |         |            |            |
| <b>DCA (unconjugated)</b>  |                     |                     |         |            |            |
| Median (IQR)               | 0.09 (0.00-0.40)    | 0.28 (0.04-0.56)    | 0.031   | 137        | 61         |
| Range                      | 0.00-5.99           | 0.00-1.32           |         |            |            |

|                            | NN PSC           | NY PSC           | p-value | NN PSC (n) | NY PSC (n) |
|----------------------------|------------------|------------------|---------|------------|------------|
| <b>GDCA</b>                |                  |                  |         |            |            |
| Median (IQR)               | 0.13 (0.00-0.56) | 0.19 (0.04-0.50) | 0.526   | 137        | 61         |
| Range                      | 0.00-2.41        | 0.00-2.10        |         |            |            |
| <b>TDCA</b>                |                  |                  |         |            |            |
| Median (IQR)               | 0.03 (0.00-0.12) | 0.02 (0.00-0.08) | 0.514   | 137        | 61         |
| Range                      | 0.00-1.35        | 0.00-0.50        |         |            |            |
| <b>LCA (total)</b>         |                  |                  |         |            |            |
| Median (IQR)               | 0.02 (0.00-0.06) | 0.09 (0.00-0.19) | <0.001  | 137        | 61         |
| Range                      | 0.00-1.18        | 0.00-0.53        |         |            |            |
| <b>LCA (unconjugated)</b>  |                  |                  |         |            |            |
| Median (IQR)               | 0.00 (0.00-0.02) | 0.03 (0.00-0.07) | <0.001  | 137        | 61         |
| Range                      | 0.00-0.41        | 0.00-0.23        |         |            |            |
| <b>GLCA</b>                |                  |                  |         |            |            |
| Median (IQR)               | 0.01 (0.00-0.04) | 0.04 (0.00-0.10) | <0.001  | 137        | 61         |
| Range                      | 0.00-0.71        | 0.00-0.28        |         |            |            |
| <b>TLCA</b>                |                  |                  |         |            |            |
| Median (IQR)               | 0.00 (0.00-0.00) | 0.00 (0.00-0.01) | 0.010   | 137        | 61         |
| Range                      | 0.00-0.06        | 0.00-0.07        |         |            |            |
| <b>HDCA (total)</b>        |                  |                  |         |            |            |
| Median (IQR)               | 0.01 (0.00-0.04) | 0.02 (0.00-0.05) | 0.316   | 137        | 61         |
| Range                      | 0.00-0.41        | 0.00-0.14        |         |            |            |
| <b>HDCA (unconjugated)</b> |                  |                  |         |            |            |
| Median (IQR)               | 0.01 (0.00-0.02) | 0.01 (0.00-0.03) | 0.501   | 137        | 61         |
| Range                      | 0.00-0.24        | 0.00-0.07        |         |            |            |
| <b>GHDCA</b>               |                  |                  |         |            |            |
| Median (IQR)               | 0.00 (0.00-0.01) | 0.00 (0.00-0.01) | 0.292   | 137        | 61         |
| Range                      | 0.00-0.17        | 0.00-0.10        |         |            |            |
| <b>THDCA</b>               |                  |                  |         |            |            |
| Median (IQR)               | 0.00 (0.00-0.00) | 0.00 (0.00-0.00) | 0.098   | 137        | 61         |
| Range                      | 0.00-0.02        | 0.00-0.00        |         |            |            |
| <b>UDCA (total)</b>        |                  |                  |         |            |            |
| Median (IQR)               | 0.13 (0.03-0.33) | 6.35 (4.51-9.24) | <0.001  | 137        | 61         |
| Range                      | 0.00-1.98        | 2.15-14.82       |         |            |            |
| <b>UDCA (unconjugated)</b> |                  |                  |         |            |            |
| Median (IQR)               | 0.01 (0.00-0.06) | 1.18 (0.60-2.54) | <0.001  | 137        | 61         |
| Range                      | 0.00-0.83        | 0.07-8.58        |         |            |            |
| <b>GUDCA</b>               |                  |                  |         |            |            |
| Median (IQR)               | 0.09 (0.03-0.22) | 4.82 (2.79-6.50) | <0.001  | 137        | 61         |
| Range                      | 0.00-1.71        | 1.36-9.59        |         |            |            |



|                               | NN PSC            | NY PSC              | p-value | NN PSC (n) | NY PSC (n) |
|-------------------------------|-------------------|---------------------|---------|------------|------------|
| <b>TUDCA</b>                  |                   |                     |         |            |            |
| Median (IQR)                  | 0.01 (0.00-0.02)  | 0.09 (0.06-0.18)    | <0.001  | 137        | 61         |
| Range                         | 0.00-0.17         | 0.02-0.92           |         |            |            |
| <b>Total BA (conj. frac.)</b> |                   |                     |         |            |            |
| Median (IQR)                  | 0.86 (0.62-0.94)  | 0.74 (0.63-0.87)    | 0.015   | 137        | 61         |
| Range                         | 0.13-1.00         | 0.28-0.99           |         |            |            |
| <b>CA (conj. frac.)</b>       |                   |                     |         |            |            |
| Median (IQR)                  | 0.89 (0.67-0.97)  | 0.90 (0.65-0.98)    | 0.803   | 137        | 61         |
| Range                         | 0.09-1.00         | 0.27-1.00           |         |            |            |
| <b>CDCA (conj. frac.)</b>     |                   |                     |         |            |            |
| Median (IQR)                  | 0.93 (0.76-0.98)  | 0.82 (0.69-0.94)    | 0.015   | 137        | 61         |
| Range                         | 0.12-1.00         | 0.37-0.99           |         |            |            |
| <b>DCA (conj. frac.)</b>      |                   |                     |         |            |            |
| Median (IQR)                  | 0.66 (0.38-0.83)  | 0.45 (0.29-0.63)    | 0.006   | 102        | 64         |
| Range                         | 0.00-1.00         | 0.00-1.00           |         |            |            |
| <b>LCA (conj. frac.)</b>      |                   |                     |         |            |            |
| Median (IQR)                  | 0.70 (0.50-0.86)  | 0.58 (0.49-0.75)    | 0.026   | 80         | 44         |
| Range                         | 0.00-1.00         | 0.25-1.00           |         |            |            |
| <b>HDCA (conj. frac.)</b>     |                   |                     |         |            |            |
| Median (IQR)                  | 0.26 (0.00-0.50)  | 0.22 (0.00-0.57)    | 0.659   | 76         | 36         |
| Range                         | 0.00-1.00         | 0.00-1.00           |         |            |            |
| <b>UDCA (conj. frac.)</b>     |                   |                     |         |            |            |
| Median (IQR)                  | 0.88 (0.69-0.97)  | 0.77 (0.65-0.88)    | 0.007   | 129        | 61         |
| Range                         | 0.00-1.00         | 0.27-0.99           |         |            |            |
| <b>Total BA (G:T ratio)</b>   |                   |                     |         |            |            |
| Median (IQR)                  | 6.60 (3.59-10.24) | 21.59 (12.74-33.80) | <0.001  | 136        | 61         |
| Range                         | 0.58-93.11        | 4.30-85.82          |         |            |            |
| <b>CA (G:T ratio)</b>         |                   |                     |         |            |            |
| Median (IQR)                  | 6.00 (3.60-9.38)  | 8.62 (5.64-12.70)   | <0.001  | 135        | 57         |
| Range                         | 0.50-70.33        | 2.59-26.00          |         |            |            |
| <b>CDCA (G:T ratio)</b>       |                   |                     |         |            |            |
| Median (IQR)                  | 6.53 (3.34-11.17) | 9.17 (6.35-13.78)   | 0.002   | 136        | 61         |
| Range                         | 0.38-92.17        | 1.58-35.11          |         |            |            |
| <b>DCA (G:T ratio)</b>        |                   |                     |         |            |            |
| Median (IQR)                  | 5.09 (2.54-8.00)  | 8.31 (5.00-10.81)   | <0.001  | 83         | 44         |
| Range                         | 0.30-44.50        | 2.00-45.00          |         |            |            |
| <b>LCA (G:T ratio)</b>        |                   |                     |         |            |            |
| Median (IQR)                  | 2.58 (1.08-6.75)  | 5.60 (4.18-8.67)    | 0.035   | 30         | 23         |
| Range                         | 0.50-17.00        | 0.67-22.00          |         |            |            |

|                                | <b>NN PSC</b>      | <b>NY PSC</b>       | <b>p-value</b> | <b>NN PSC (n)</b> | <b>NY PSC (n)</b> |
|--------------------------------|--------------------|---------------------|----------------|-------------------|-------------------|
| <b>HDCA (G:T ratio)</b>        |                    |                     |                |                   |                   |
| Median (IQR)                   | 3.50 (3.25-3.75)   | na                  | na             | 2                 | 0                 |
| Range                          | 3.00-4.00          | na                  |                |                   |                   |
| <b>UDCA (G:T ratio)</b>        |                    |                     |                |                   |                   |
| Median (IQR)                   | 10.50 (5.00-22.00) | 46.45 (29.94-64.75) | <0.001         | 73                | 61                |
| Range                          | 0.71-124.00        | 7.09-145.00         |                |                   |                   |
| <b>CA (frac. BA pool)</b>      |                    |                     |                |                   |                   |
| Median (IQR)                   | 0.25 (0.17-0.38)   | 0.07 (0.03-0.12)    | <0.001         | 137               | 61                |
| Range                          | 0.04-0.79          | 0.00-0.39           |                |                   |                   |
| <b>CDCA (frac. BA pool)</b>    |                    |                     |                |                   |                   |
| Median (IQR)                   | 0.48 (0.38-0.61)   | 0.12 (0.10-0.17)    | <0.001         | 137               | 61                |
| Range                          | 0.14-0.93          | 0.04-0.40           |                |                   |                   |
| <b>DCA (frac. BA pool)</b>     |                    |                     |                |                   |                   |
| Median (IQR)                   | 0.11 (0.00-0.26)   | 0.06 (0.01-0.12)    | 0.111          | 137               | 61                |
| Range                          | 0.00-0.64          | 0.00-0.26           |                |                   |                   |
| <b>LCA (frac. BA pool)</b>     |                    |                     |                |                   |                   |
| Median (IQR)                   | 0.00 (0.00-0.01)   | 0.01 (0.00-0.02)    | 0.026          | 137               | 61                |
| Range                          | 0.00-0.12          | 0.00-0.08           |                |                   |                   |
| <b>HDCA (frac. BA pool)</b>    |                    |                     |                |                   |                   |
| Median (IQR)                   | 0.00 (0.00-0.01)   | 0.00 (0.00-0.00)    | 0.408          | 137               | 61                |
| Range                          | 0.00-0.05          | 0.00-0.01           |                |                   |                   |
| <b>UDCA (frac. BA pool)</b>    |                    |                     |                |                   |                   |
| Median (IQR)                   | 0.03 (0.01-0.07)   | 0.70 (0.59-0.77)    | <0.001         | 137               | 61                |
| Range                          | 0.00-0.29          | 0.42-0.89           |                |                   |                   |
| <b>CA:CDCA ratio</b>           |                    |                     |                |                   |                   |
| Median (IQR)                   | 0.50 (0.31-0.80)   | 0.51 (0.33-0.75)    | 0.913          | 137               | 61                |
| Range                          | 0.07-3.77          | 0.05-3.09           |                |                   |                   |
| <b>CA:DCA ratio</b>            |                    |                     |                |                   |                   |
| Median (IQR)                   | 1.16 (0.45-5.25)   | 0.73 (0.29-3.27)    | 0.092          | 102               | 54                |
| Range                          | 0.09-822.00        | 0.09-305.00         |                |                   |                   |
| <b>CDCA:LCA+HDCA+UDCA</b>      |                    |                     |                |                   |                   |
| Median (IQR)                   | 9.33 (4.00-23.00)  | 0.20 (0.14-0.27)    | <0.001         | 129               | 61                |
| Range                          | 0.66-422.00        | 0.04-0.94           |                |                   |                   |
| <b>Total BA*</b>               |                    |                     |                |                   |                   |
| Median (IQR)                   | 4.54 (2.37-7.83)   | 2.93 (1.87-4.28)    | 0.001          | 137               | 61                |
| Range                          | 0.59-16.10         | 0.61-8.92           |                |                   |                   |
| <b>Total BA (conj. frac.)*</b> |                    |                     |                |                   |                   |
| Median (IQR)                   | 0.85 (0.61-0.94)   | 0.71 (0.54-0.86)    | 0.005          | 137               | 61                |
| Range                          | 0.12-1.00          | 0.29-0.99           |                |                   |                   |

|                              | Control           | NN PSC            | p-value | NN<br>PSC (n) | NY<br>PSC (n) |
|------------------------------|-------------------|-------------------|---------|---------------|---------------|
| <b>Total BA (G:T ratio)*</b> |                   |                   |         |               |               |
| Median (IQR)                 | 6.43 (3.48-10.00) | 9.33 (6.65-13.92) | <0.001  | 136           | 61            |
| Range                        | 0.58-90.89        | 2.54-36.50        |         |               |               |
| <b>CA (frac. BA pool)*</b>   |                   |                   |         |               |               |
| Median (IQR)                 | 0.25 (0.18-0.39)  | 0.24 (0.12-0.32)  | 0.131   | 136           | 61            |
| Range                        | 0.04-0.79         | 0.02-0.73         |         |               |               |
| <b>CDCA (frac. BA pool)*</b> |                   |                   |         |               |               |
| Median (IQR)                 | 0.51 (0.40-0.65)  | 0.44 (0.30-0.56)  | 0.010   | 136           | 61            |
| Range                        | 0.14-0.93         | 0.16-0.86         |         |               |               |
| <b>DCA (frac. BA pool)*</b>  |                   |                   |         |               |               |
| Median (IQR)                 | 0.12 (0.00-0.29)  | 0.24 (0.03-0.41)  | 0.008   | 136           | 61            |
| Range                        | 0.00-0.65         | 0.00-0.58         |         |               |               |
| <b>LCA (frac. BA pool)*</b>  |                   |                   |         |               |               |
| Median (IQR)                 | 0.00 (0.00-0.01)  | 0.03 (0.00-0.06)  | <0.001  | 136           | 61            |
| Range                        | 0.00-0.12         | 0.00-0.28)        |         |               |               |
| <b>HDCA (frac. BA pool)*</b> |                   |                   |         |               |               |
| Median (IQR)                 | 0.00 (0.00-0.01)  | 0.01 (0.00-0.01)  | 0.098   | 136           | 61            |
| Range                        | 0.00-0.06         | 0.00-0.05         |         |               |               |

\*Values with UDCA and its conjugated forms (GUDCA and TUDCA) removed from the analysis;  
 NN PSC: Normal total bile acid, No UDCA treatment; NY PSC: Normal total bile acid, Yes UDCA treatment

**Supplementary Table 4.** Bile acids in HN and HY PSC patients.

|                            | HN PSC              | HY PSC               | p-value | HN PSC (n) | HY PSC (n) |
|----------------------------|---------------------|----------------------|---------|------------|------------|
| <b>Age in years</b>        |                     |                      |         |            |            |
| Median (IQR)               | 47.50 (32.21-59.69) | 49.13 (34.11-60.88)  | 0.758   | 63         | 115        |
| Range                      | 20.31-79.68         | 10.74-77.56          |         |            |            |
| <b>Sex (% Male)</b>        | 54.0                | 60.9                 | 0.372   | 63         | 115        |
| <b>Total BA</b>            |                     |                      |         |            |            |
| Median (IQR)               | 38.73 (23.61-63.57) | 48.69 (28.84-116.70) | 0.022   | 63         | 115        |
| Range                      | 18.53-291.62        | 17.81-646.47         |         |            |            |
| <b>CA (total)</b>          |                     |                      |         |            |            |
| Median (IQR)               | 18.65 (10.26-32.42) | 4.20 (1.89-13.54)    | <0.001  | 63         | 115        |
| Range                      | 3.65-224.36         | 0.34-192.53          |         |            |            |
| <b>CA (unconjugated)</b>   |                     |                      |         |            |            |
| Median (IQR)               | 0.07 (0.04-0.17)    | 0.07 (0.03-0.22)     | 0.701   | 63         | 115        |
| Range                      | 0.01-10.65          | 0.00-5.72            |         |            |            |
| <b>GCA</b>                 |                     |                      |         |            |            |
| Median (IQR)               | 11.67 (5.27-17.57)  | 3.33 (1.56-10.12)    | <0.001  | 63         | 115        |
| Range                      | 2.44-165.50         | 0.19-151.29          |         |            |            |
| <b>TCA</b>                 |                     |                      |         |            |            |
| Median (IQR)               | 7.60 (2.74-16.16)   | 0.53 (0.15-2.94)     | <0.001  | 63         | 115        |
| Range                      | 0.47-58.61          | 0.00-41.19           |         |            |            |
| <b>CDCA (total)</b>        |                     |                      |         |            |            |
| Median (IQR)               | 14.21 (9.36-24.92)  | 6.22 (3.96-16.37)    | <0.001  | 63         | 115        |
| Range                      | 3.53-71.89          | 1.05-141.73          |         |            |            |
| <b>CDCA (unconjugated)</b> |                     |                      |         |            |            |
| Median (IQR)               | 0.07 (0.03-0.21)    | 0.25 (0.08-0.66)     | <0.001  | 63         | 115        |
| Range                      | 0.00-14.78          | 0.01-7.27            |         |            |            |
| <b>GCDCA</b>               |                     |                      |         |            |            |
| Median (IQR)               | 7.80 (5.56-16.44)   | 4.73 (3.04-13.17)    | <0.001  | 63         | 115        |
| Range                      | 2.16-39.30          | 0.85-119.44          |         |            |            |
| <b>TCDCA</b>               |                     |                      |         |            |            |
| Median (IQR)               | 5.22 (3.09-10.93)   | 0.98 (0.35-3.01)     | <0.001  | 63         | 115        |
| Range                      | 0.35-42.03          | 0.04-27.78           |         |            |            |
| <b>DCA (total)</b>         |                     |                      |         |            |            |
| Median (IQR)               | 0.87 (0.18-3.19)    | 1.15 (0.22-2.71)     | 0.995   | 63         | 115        |
| Range                      | 0.00-24.36          | 0.00-18.32           |         |            |            |
| <b>DCA (unconjugated)</b>  |                     |                      |         |            |            |
| Median (IQR)               | 0.03 (0.01-0.24)    | 0.13 (0.01-0.51)     | 0.006   | 63         | 115        |
| Range                      | 0.00-2.63           | 0.00-2.92            |         |            |            |

|                            | HN PSC           | HY PSC              | p-value | HN PSC (n) | HY PSC (n) |
|----------------------------|------------------|---------------------|---------|------------|------------|
| <b>GDCA</b>                |                  |                     |         |            |            |
| Median (IQR)               | 0.40 (0.08-1.84) | 0.78 (0.14-1.82)    | 0.458   | 63         | 115        |
| Range                      | 0.00-14.96       | 0.00-15.49          |         |            |            |
| <b>TDCA</b>                |                  |                     |         |            |            |
| Median (IQR)               | 0.34 (0.08-1.08) | 0.15 (0.02-0.34)    | 0.001   | 63         | 115        |
| Range                      | 0.00-8.55        | 0.00-3.41           |         |            |            |
| <b>LCA (total)</b>         |                  |                     |         |            |            |
| Median (IQR)               | 0.04 (0.02-0.12) | 0.18 (0.02-0.66)    | 0.002   | 63         | 115        |
| Range                      | 0.00-1.15        | 0.00-2.85           |         |            |            |
| <b>LCA (unconjugated)</b>  |                  |                     |         |            |            |
| Median (IQR)               | 0.01 (0.00-0.02) | 0.05 (0.00-0.15)    | <0.001  | 63         | 115        |
| Range                      | 0.00-0.67        | 0.00-0.96           |         |            |            |
| <b>GLCA</b>                |                  |                     |         |            |            |
| Median (IQR)               | 0.02 (0.01-0.06) | 0.09 (0.01-0.36)    | <0.001  | 63         | 115        |
| Range                      | 0.00-0.31        | 0.00-2.14           |         |            |            |
| <b>TLCA</b>                |                  |                     |         |            |            |
| Median (IQR)               | 0.02 (0.01-0.04) | 0.01 (0.00-0.08)    | 0.951   | 63         | 115        |
| Range                      | 0.00-0.17        | 0.00-0.56           |         |            |            |
| <b>HDCA (total)</b>        |                  |                     |         |            |            |
| Median (IQR)               | 0.01 (0.00-0.03) | 0.01 (0.00-0.06)    | 0.358   | 63         | 115        |
| Range                      | 0.00-0.28        | 0.00-0.73           |         |            |            |
| <b>HDCA (unconjugated)</b> |                  |                     |         |            |            |
| Median (IQR)               | 0.01 (0.00-0.01) | 0.00 (0.00-0.03)    | 0.328   | 63         | 115        |
| Range                      | 0.00-0.11        | 0.00-0.15           |         |            |            |
| <b>GHDCA</b>               |                  |                     |         |            |            |
| Median (IQR)               | 0.00 (0.00-0.01) | 0.00 (0.00-0.01)    | 0.662   | 63         | 115        |
| Range                      | 0.00-0.17        | 0.00-0.73           |         |            |            |
| <b>THDCA</b>               |                  |                     |         |            |            |
| Median (IQR)               | 0.00 (0.00-0.00) | 0.00-0.00           | 0.100   | 63         | 115        |
| Range                      | 0.00-0.07        | 0.00-0.03           |         |            |            |
| <b>UDCA (total)</b>        |                  |                     |         |            |            |
| Median (IQR)               | 0.45 (0.15-0.91) | 31.10 (19.71-63.93) | <0.001  | 63         | 115        |
| Range                      | 0.01-2.03        | 8.87-537.71         |         |            |            |
| <b>UDCA (unconjugated)</b> |                  |                     |         |            |            |
| Median (IQR)               | 0.01 (0.00-0.03) | 3.87 (1.56-6.83)    | <0.001  | 63         | 115        |
| Range                      | 0.00-0.36        | 0.24-52.33          |         |            |            |
| <b>GUDCA</b>               |                  |                     |         |            |            |
| Median (IQR)               | 0.29 (0.08-0.73) | 27.12 (14.82-52.66) | <0.001  | 63         | 115        |
| Range                      | 0.01-1.71        | 2.72-472.47         |         |            |            |

|                               | HN PSC           | HY PSC             | p-value | HN PSC (n) | HY PSC (n) |
|-------------------------------|------------------|--------------------|---------|------------|------------|
| <b>TUDCA</b>                  |                  |                    |         |            |            |
| Median (IQR)                  | 0.07 (0.02-0.20) | 1.20 (0.49-3.75)   | <0.001  | 63         | 115        |
| Range                         | 0.00-0.68        | 0.09-51.06         |         |            |            |
| <b>Total BA (conj. frac.)</b> |                  |                    |         |            |            |
| Median (IQR)                  | 0.99 (0.98-1.00) | 0.91 (0.82-0.97)   | <0.001  | 63         | 115        |
| Range                         | 0.24-1.00        | 0.37-1.00          |         |            |            |
| <b>CA (conj. frac.)</b>       |                  |                    |         |            |            |
| Median (IQR)                  | 1.00 (0.99-1.00) | 0.99 (0.91-1.00)   | <0.001  | 63         | 115        |
| Range                         | 0.24-1.00        | 0.18-1.00          |         |            |            |
| <b>CDCA (conj. frac.)</b>     |                  |                    |         |            |            |
| Median (IQR)                  | 1.00 (0.99-1.00) | 0.97 (0.90-0.99)   | <0.001  | 63         | 115        |
| Range                         | 0.24-1.00        | 0.39-1.00          |         |            |            |
| <b>DCA (conj. frac.)</b>      |                  |                    |         |            |            |
| Median (IQR)                  | 0.97 (0.93-0.99) | 0.85 (0.69-0.94)   | <0.001  | 61         | 107        |
| Range                         | 0.67-1.00        | 0.00-1.00          |         |            |            |
| <b>LCA (conj. frac.)</b>      |                  |                    |         |            |            |
| Median (IQR)                  | 0.87 (0.80-1.00) | 0.74 (0.63-0.84)   | <0.001  | 55         | 93         |
| Range                         | 0.33-1.00        | 0.00-1.00          |         |            |            |
| <b>HDCA (conj. frac.)</b>     |                  |                    |         |            |            |
| Median (IQR)                  | 0.41 (0.00-0.67) | 0.11 (0.00-0.61)   | 0.516   | 37         | 71         |
| Range                         | 0.00-1.00        | 0.00-1.00          |         |            |            |
| <b>UDCA (conj. frac.)</b>     |                  |                    |         |            |            |
| Median (IQR)                  | 0.98 (0.92-1.00) | 0.90 (0.79-0.97)   | <0.001  | 63         | 115        |
| Range                         | 0.42-1.00        | 0.28-1.00          |         |            |            |
| <b>Total BA (G:T ratio)</b>   |                  |                    |         |            |            |
| Median (IQR)                  | 1.81 (0.99-2.62) | 12.52 (7.62-23.15) | <0.001  | 63         | 115        |
| Range                         | 0.37-9.61        | 1.67-67.52         |         |            |            |
| <b>CA (G:T ratio)</b>         |                  |                    |         |            |            |
| Median (IQR)                  | 1.69 (0.96-2.80) | 6.25 (3.93-10.48)  | <0.001  | 63         | 114        |
| Range                         | 0.27-9.23        | 0.62-30.00         |         |            |            |
| <b>CDCA (G:T ratio)</b>       |                  |                    |         |            |            |
| Median (IQR)                  | 1.76 (0.99-2.83) | 6.28 (4.05-10.21)  | <0.001  | 63         | 115        |
| Range                         | 0.36-10.69       | 0.69-22.86         |         |            |            |
| <b>DCA (G:T ratio)</b>        |                  |                    |         |            |            |
| Median (IQR)                  | 1.27 (0.71-2.13) | 6.02 (3.45-9.35)   | <0.001  | 55         | 94         |
| Range                         | 0.22-11.33       | 0.59-22.00         |         |            |            |
| <b>LCA (G:T ratio)</b>        |                  |                    |         |            |            |
| Median (IQR)                  | 1.00 (0.68-2.94) | 4.25 (2.40-7.80)   | <0.001  | 42         | 65         |
| Range                         | 0.10-11.00       | 0.89-36.00         |         |            |            |

|                                | HN PSC               | HY PSC              | p-value | HN PSC (n) | HY PSC (n) |
|--------------------------------|----------------------|---------------------|---------|------------|------------|
| <b>HDCA (G:T ratio)</b>        |                      |                     |         |            |            |
| Median (IQR)                   | 1.00 (0.81-1.25)     | 6.25 (3.88-8.62)    | 0.044   | 6          | 2          |
| Range                          | 0.71-1.40            | 1.50-11.00          |         |            |            |
| <b>UDCA (G:T ratio)</b>        |                      |                     |         |            |            |
| Median (IQR)                   | 3.0 (1.76-6.82)      | 23.01 (13.57-38.67) | <0.001  | 58         | 115        |
| Range                          | 0.14-26.67           | 3.22-102.82         |         |            |            |
| <b>CA (frac. BA pool)</b>      |                      |                     |         |            |            |
| Median (IQR)                   | 0.50 (0.35-0.65)     | 0.10 (0.05-0.17)    | <0.001  | 63         | 115        |
| Range                          | 0.13-0.79            | 0.01-0.44           |         |            |            |
| <b>CDCA (frac. BA pool)</b>    |                      |                     |         |            |            |
| Median (IQR)                   | 0.40 (0.29-0.49)     | 0.14 (0.11-0.19)    | <0.001  | 63         | 115        |
| Range                          | 0.15-0.85            | 0.04-0.42           |         |            |            |
| <b>DCA (frac. BA pool)</b>     |                      |                     |         |            |            |
| Median (IQR)                   | 0.03 (0.00-0.09)     | 0.02 (0.00-0.06)    | 0.217   | 63         | 115        |
| Range                          | 0.00-0.48            | 0.00-0.21           |         |            |            |
| <b>LCA (frac. BA pool)</b>     |                      |                     |         |            |            |
| Median (IQR)                   | 0.00 (0.00-0.00)     | 0.00 (0.00-0.01)    | 0.021   | 63         | 115        |
| Range                          | 0.00-0.06            | 0.00-0.04           |         |            |            |
| <b>HDCA (frac. BA pool)</b>    |                      |                     |         |            |            |
| Median (IQR)                   | 0.00 (0.00-0.00)     | 0.00 (0.00-0.00)    | 0.531   | 63         | 115        |
| Range                          | 0.00-0.02            | 0.00-0.01           |         |            |            |
| <b>UDCA (frac. BA pool)</b>    |                      |                     |         |            |            |
| Median (IQR)                   | 0.01 (0.00-0.02)     | 0.68 (0.59-0.77)    | <0.001  | 63         | 115        |
| Range                          | 0.00-0.10            | 0.40-0.91           |         |            |            |
| <b>CA:CDCA ratio</b>           |                      |                     |         |            |            |
| Median (IQR)                   | 1.17 (0.69-2.10)     | 0.57 (0.38-1.09)    | <0.001  | 63         | 115        |
| Range                          | 0.15-5.17            | 0.06-4.43           |         |            |            |
| <b>CA:DCA ratio</b>            |                      |                     |         |            |            |
| Median (IQR)                   | 21.96 (3.34-129.27)  | 3.37 (1.03-31.84)   | <0.001  | 61         | 107        |
| Range                          | 0.42-2002.00         | 0.19-1681.00        |         |            |            |
| <b>CDCA:LCA+HDCA+UDCA</b>      |                      |                     |         |            |            |
| Median (IQR)                   | 31.84 (13.96-109.23) | 0.21 (0.15-0.31)    | <0.001  | 63         | 115        |
| Range                          | 3.62-1310.00         | 0.004-0.97          |         |            |            |
| <b>Total BA*</b>               |                      |                     |         |            |            |
| Median (IQR)                   | 38.02 (22.96-62.69)  | 14.63 (7.75-36.40)  | <0.001  | 63         | 115        |
| Range                          | 17.10-290.60         | 2.41-313.39         |         |            |            |
| <b>Total BA (conj. frac.)*</b> |                      |                     |         |            |            |
| Median (IQR)                   | 0.99 (0.98-1.00)     | 0.94 (0.86-0.99)    | <0.001  | 63         | 115        |
| Range                          | 0.24-1.00            | 0.32-1.00           |         |            |            |

|                              | Control          | NN PSC            | p-value | HN<br>PSC (n) | HY<br>PSC (n) |
|------------------------------|------------------|-------------------|---------|---------------|---------------|
| <b>Total BA (G:T ratio)*</b> |                  |                   |         |               |               |
| Median (IQR)                 | 1.79 (0.98-2.59) | 6.49 (3.96-10.44) | <0.001  | 63            | 115           |
| Range                        | 0.37-9.31        | 0.67-23.86        |         |               |               |
| <b>CA (frac. BA pool)*</b>   |                  |                   |         |               |               |
| Median (IQR)                 | 0.50 (0.35-0.65) | 0.31 (0.21-0.45)  | <0.001  | 63            | 115           |
| Range                        | 0.13-0.81        | 0.05-0.81         |         |               |               |
| <b>CDCA (frac. BA pool)*</b> |                  |                   |         |               |               |
| Median (IQR)                 | 0.41 (0.30-0.50) | 0.47 (0.38-0.64)  | 0.002   | 63            | 115           |
| Range                        | 0.16-0.87        | 0.18-0.93         |         |               |               |
| <b>DCA (frac. BA pool)*</b>  |                  |                   |         |               |               |
| Median (IQR)                 | 0.03 (0.00-0.10) | 0.09 (0.01-0.23)  | 0.026   | 63            | 115           |
| Range                        | 0.00-0.50        | 0.00-0.51         |         |               |               |
| <b>LCA (frac. BA pool)*</b>  |                  |                   |         |               |               |
| Median (IQR)                 | 0.00 (0.00-0.00) | 0.01 (0.00-0.03)  | <0.001  | 63            | 115           |
| Range                        | 0.00-0.06        | 0.00-0.20         |         |               |               |
| <b>HDCA (frac. BA pool)*</b> |                  |                   |         |               |               |
| Median (IQR)                 | 0.00 (0.00-0.00) | 0.00 (0.00-0.00)  | 0.017   | 63            | 115           |
| Range                        | 0.00-0.02        | 0.00-0.0          |         |               |               |

\*Values with UDCA and its conjugated forms (GUDCA and TUDCA) removed from the analysis;

HN PSC: High total bile acid, No UDCA treatment; HY PSC: High total bile acid, Yes UDCA treatment



**Supplementary Table 5.** Bile acids in NN and HN PSC patients.

|                            | <b>NN PSC</b>       | <b>HN PSC</b>       | <b>p-value</b> | <b>NN PSC (n)</b> | <b>HN PSC (n)</b> |
|----------------------------|---------------------|---------------------|----------------|-------------------|-------------------|
| <b>Age in years</b>        |                     |                     |                |                   |                   |
| Median (IQR)               | 51.14 (32.76-61.38) | 47.50 (32.21-59.69) | 0.741          | 137               | 63                |
| Range                      | 11.82-78.53         | 20.31-79.68         |                |                   |                   |
| <b>Sex (% Male)</b>        | 59.1                | 54.0                | 0.493          | 137               | 63                |
| <b>Total BA</b>            |                     |                     |                |                   |                   |
| Median (IQR)               | 4.98 (2.45-8.50)    | 38.73 (23.61-63.57) | <0.001         | 137               | 63                |
| Range                      | 0.59-16.35          | 18.53-291.62        |                |                   |                   |
| <b>CA (total)</b>          |                     |                     |                |                   |                   |
| Median (IQR)               | 1.00 (0.46-2.12)    | 18.65 (10.26-32.42) | <0.001         | 137               | 63                |
| Range                      | 0.04-10.09          | 3.65-224.36)        |                |                   |                   |
| <b>CA (unconjugated)</b>   |                     |                     |                |                   |                   |
| Median (IQR)               | 0.07 (0.03-0.23)    | 0.07 (0.04-0.17)    | 0.937          | 137               | 63                |
| Range                      | 0.00-2.99           | 0.01-10.65          |                |                   |                   |
| <b>GCA</b>                 |                     |                     |                |                   |                   |
| Median (IQR)               | 0.52 (0.27-1.44)    | 11.67 (5.27-17.57)  | <0.001         | 137               | 63                |
| Range                      | 0.02-6.74           | 2.44-165.50         |                |                   |                   |
| <b>TCA</b>                 |                     |                     |                |                   |                   |
| Median (IQR)               | 0.09 (0.04-0.34)    | 7.60 (2.74-16.16)   | <0.001         | 137               | 63                |
| Range                      | 0.00-3.67           | 0.47-58.61          |                |                   |                   |
| <b>CDCA (total)</b>        |                     |                     |                |                   |                   |
| Median (IQR)               | 2.14 (1.22-4.11)    | 14.21 (9.36-24.92)  | <0.001         | 137               | 63                |
| Range                      | 0.16-10.18          | 3.53-71.89          |                |                   |                   |
| <b>CDCA (unconjugated)</b> |                     |                     |                |                   |                   |
| Median (IQR)               | 0.14 (0.05-0.46)    | 0.07 (0.03-0.21)    | 0.025          | 137               | 63                |
| Range                      | 0.00-5.23           | 0.00-14.78          |                |                   |                   |
| <b>GCDCA</b>               |                     |                     |                |                   |                   |
| Median (IQR)               | 1.47 (0.69-2.44)    | 7.80 (5.56-16.44)   | <0.001         | 137               | 63                |
| Range                      | 0.10-8.29           | 2.16-39.30          |                |                   |                   |
| <b>TCDCA</b>               |                     |                     |                |                   |                   |
| Median (IQR)               | 0.20 (0.08-0.61)    | 5.22 (3.09-10.93)   | <0.001         | 137               | 63                |
| Range                      | 0.00-3.25           | 0.35-42.03          |                |                   |                   |
| <b>DCA (total)</b>         |                     |                     |                |                   |                   |
| Median (IQR)               | 0.39 (0.00-1.26)    | 0.87 (0.18-3.19)    | <0.001         | 137               | 63                |
| Range                      | 0.00-7.81           | 0.00-24.36          |                |                   |                   |
| <b>DCA (unconjugated)</b>  |                     |                     |                |                   |                   |
| Median (IQR)               | 0.09 (0.00-0.40)    | 0.03 (0.01-0.24)    | 0.237          | 137               | 63                |
| Range                      | 0.00-5.99           | 0.00-2.63           |                |                   |                   |

|                            | <b>NN PSC</b>    | <b>HN PSC</b>    | <b>p-value</b> | <b>NN<br/>PSC (n)</b> | <b>HN<br/>PSC (n)</b> |
|----------------------------|------------------|------------------|----------------|-----------------------|-----------------------|
| <b>GDCA</b>                |                  |                  |                |                       |                       |
| Median (IQR)               | 0.13 (0.00-0.56) | 0.40 (0.08-1.84) | <0.001         | 137                   | 63                    |
| Range                      | 0.00-2.41        | 0.00-14.96       |                |                       |                       |
| <b>TDCA</b>                |                  |                  |                |                       |                       |
| Median (IQR)               | 0.03 (0.00-0.12) | 0.34 (0.08-1.08) | <0.001         | 137                   | 63                    |
| Range                      | 0.00-1.35        | 0.00-8.55        |                |                       |                       |
| <b>LCA (total)</b>         |                  |                  |                |                       |                       |
| Median (IQR)               | 0.02 (0.00-0.06) | 0.04 (0.02-0.12) | <0.001         | 137                   | 63                    |
| Range                      | 0.00-1.18        | 0.00-1.15        |                |                       |                       |
| <b>LCA (unconjugated)</b>  |                  |                  |                |                       |                       |
| Median (IQR)               | 0.00 (0.00-0.02) | 0.01 (0.00-0.02) | 0.521          | 137                   | 63                    |
| Range                      | 0.00-0.41        | 0.00-0.67        |                |                       |                       |
| <b>GLCA</b>                |                  |                  |                |                       |                       |
| Median (IQR)               | 0.01 (0.00-0.04) | 0.02 (0.01-0.06) | 0.005          | 137                   | 63                    |
| Range                      | 0.00-0.71        | 0.00-0.31        |                |                       |                       |
| <b>TLCA</b>                |                  |                  |                |                       |                       |
| Median (IQR)               | 0.00 (0.00-0.00) | 0.02 (0.01-0.04) | <0.001         | 137                   | 63                    |
| Range                      | 0.00-0.06        | 0.00-0.17        |                |                       |                       |
| <b>HDCA (total)</b>        |                  |                  |                |                       |                       |
| Median (IQR)               | 0.01 (0.00-0.04) | 0.01 (0.00-0.03) | 0.996          | 137                   | 63                    |
| Range                      | 0.00-0.41        | 0.00-0.28        |                |                       |                       |
| <b>HDCA (unconjugated)</b> |                  |                  |                |                       |                       |
| Median (IQR)               | 0.01 (0.00-0.02) | 0.01 (0.00-0.01) | 0.460          | 137                   | 63                    |
| Range                      | 0.00-0.24        | 0.00-0.11        |                |                       |                       |
| <b>GHDCA</b>               |                  |                  |                |                       |                       |
| Median (IQR)               | 0.00 (0.00-0.01) | 0.00 (0.00-0.01) | 0.747          | 137                   | 63                    |
| Range                      | 0.00-0.17        | 0.00-0.17        |                |                       |                       |
| <b>THDCA</b>               |                  |                  |                |                       |                       |
| Median (IQR)               | 0.00 (0.00-0.00) | 0.00 (0.00-0.00) | 0.012          | 137                   | 63                    |
| Range                      | 0.00-0.02        | 0.00-0.07        |                |                       |                       |
| <b>UDCA (total)</b>        |                  |                  |                |                       |                       |
| Median (IQR)               | 0.13 (0.03-0.33) | 0.45 (0.15-0.91) | <0.001         | 137                   | 63                    |
| Range                      | 0.00-1.98        | 0.01-2.03        |                |                       |                       |
| <b>UDCA (unconjugated)</b> |                  |                  |                |                       |                       |
| Median (IQR)               | 0.01 (0.00-0.06) | 0.01 (0.00-0.03) | 0.080          | 137                   | 63                    |
| Range                      | 0.00-0.83        | 0.00-0.36        |                |                       |                       |
| <b>GUDCA</b>               |                  |                  |                |                       |                       |
| Median (IQR)               | 0.09 (0.03-0.22) | 0.29 (0.08-0.73) | <0.001         | 137                   | 63                    |
| Range                      | 0.00-1.71        | 0.01-1.71        |                |                       |                       |

|                               | <b>NN PSC</b>     | <b>HN PSC</b>    | <b>p-value</b> | <b>NN<br/>PSC (n)</b> | <b>HN<br/>PSC (n)</b> |
|-------------------------------|-------------------|------------------|----------------|-----------------------|-----------------------|
| <b>TUDCA</b>                  |                   |                  |                |                       |                       |
| Median (IQR)                  | 0.01 (0.00-0.02)  | 0.07 (0.02-0.20) | <0.001         | 137                   | 63                    |
| Range                         | 0.00-0.17         | 0.00-0.68        |                |                       |                       |
| <b>Total BA (conj. frac.)</b> |                   |                  |                |                       |                       |
| Median (IQR)                  | 0.86 (0.62-0.94)  | 0.99 (0.98-1.00) | <0.001         | 137                   | 63                    |
| Range                         | 0.13-1.00         | 0.24-1.00        |                |                       |                       |
| <b>CA (conj. frac.)</b>       |                   |                  |                |                       |                       |
| Median (IQR)                  | 0.89 (0.67-0.97)  | 1.00 (0.99-1.00) | <0.001         | 137                   | 63                    |
| Range                         | 0.09-1.00         | 0.24-1.00        |                |                       |                       |
| <b>CDCA (conj. frac.)</b>     |                   |                  |                |                       |                       |
| Median (IQR)                  | 0.93 (0.76-0.98)  | 1.00 (0.99-1.00) | <0.001         | 137                   | 63                    |
| Range                         | 0.12-1.00         | 0.24-1.00        |                |                       |                       |
| <b>DCA (conj. frac.)</b>      |                   |                  |                |                       |                       |
| Median (IQR)                  | 0.66 (0.38-0.83)  | 0.97 (0.93-0.99) | <0.001         | 102                   | 61                    |
| Range                         | 0.00-1.00         | 0.67-1.00        |                |                       |                       |
| <b>LCA (conj. frac.)</b>      |                   |                  |                |                       |                       |
| Median (IQR)                  | 0.70 (0.50-0.86)  | 0.87 (0.80-1.00) | <0.001         | 80                    | 55                    |
| Range                         | 0.00-1.00         | 0.33-1.00        |                |                       |                       |
| <b>HDCA (conj. frac.)</b>     |                   |                  |                |                       |                       |
| Median (IQR)                  | 0.26 (0.00-0.50)  | 0.41 (0.00-0.67) | 0.137          | 76                    | 37                    |
| Range                         | 0.00-1.00         | 0.00-1.00        |                |                       |                       |
| <b>UDCA (conj. frac.)</b>     |                   |                  |                |                       |                       |
| Median (IQR)                  | 0.88 (0.69-0.97)  | 0.98 (0.92-1.00) | <0.001         | 129                   | 63                    |
| Range                         | 0.00-1.00         | 0.42-1.00        |                |                       |                       |
| <b>Total BA (G:T ratio)</b>   |                   |                  |                |                       |                       |
| Median (IQR)                  | 6.60 (3.59-10.24) | 1.81 (0.99-2.62) | <0.001         | 136                   | 63                    |
| Range                         | 0.58-93.11        | 0.37-9.61        |                |                       |                       |
| <b>CA (G:T ratio)</b>         |                   |                  |                |                       |                       |
| Median (IQR)                  | 6.00 (3.60-9.38)  | 1.69 (0.96-2.80) | <0.001         | 135                   | 63                    |
| Range                         | 0.50-70.33        | 0.27-9.23        |                |                       |                       |
| <b>CDCA (G:T ratio)</b>       |                   |                  |                |                       |                       |
| Median (IQR)                  | 6.53 (3.34-11.17) | 1.76 (0.99-2.83) | <0.001         | 136                   | 63                    |
| Range                         | 0.38-92.17        | 0.36-10.69       |                |                       |                       |
| <b>DCA (G:T ratio)</b>        |                   |                  |                |                       |                       |
| Median (IQR)                  | 5.09 (2.54-8.00)  | 1.27 (0.71-2.13) | <0.001         | 83                    | 55                    |
| Range                         | 0.30-44.50        | 0.22-11.33       |                |                       |                       |
| <b>LCA (G:T ratio)</b>        |                   |                  |                |                       |                       |
| Median (IQR)                  | 2.58 (1.08-6.75)  | 1.00 (0.68-2.94) | 0.004          | 30                    | 42                    |
| Range                         | 0.50-17.00        | 0.10-11.00       |                |                       |                       |

|                             | <b>NN PSC</b>      | <b>HN PSC</b>       | <b>p-value</b> | <b>NN<br/>PSC (n)</b> | <b>HN<br/>PSC (n)</b> |
|-----------------------------|--------------------|---------------------|----------------|-----------------------|-----------------------|
| <b>HDCA (G:T ratio)</b>     |                    |                     |                |                       |                       |
| Median (IQR)                | 3.50 (3.25-3.75)   | 1.00 (0.81-1.25)    | 0.044          | 2                     | 6                     |
| Range                       | 3.00-4.00          | 0.71-1.40           |                |                       |                       |
| <b>UDCA (G:T ratio)</b>     |                    |                     |                |                       |                       |
| Median (IQR)                | 10.50 (5.00-22.00) | 3.00 (1.76-6.82)    | <0.001         | 73                    | 58                    |
| Range                       | 0.71-124.00        | 0.14-26.67          |                |                       |                       |
| <b>CA (frac. BA pool)</b>   |                    |                     |                |                       |                       |
| Median (IQR)                | 0.25 (0.17-0.38)   | 0.50 (0.35-0.64)    | <0.001         | 137                   | 63                    |
| Range                       | 0.04-0.79          | 0.13-0.79           |                |                       |                       |
| <b>CDCA (frac. BA pool)</b> |                    |                     |                |                       |                       |
| Median (IQR)                | 0.48 (0.38-0.61)   | 0.40 (0.29-0.49)    | <0.001         | 137                   | 63                    |
| Range                       | 0.14-0.93          | 0.15-0.85           |                |                       |                       |
| <b>DCA (frac. BA pool)</b>  |                    |                     |                |                       |                       |
| Median (IQR)                | 0.11 (0.00-0.26)   | 0.03 (0.00-0.09)    | 0.111          | 137                   | 63                    |
| Range                       | 0.00-0.64          | 0.00-0.48           |                |                       |                       |
| <b>LCA (frac. BA pool)</b>  |                    |                     |                |                       |                       |
| Median (IQR)                | 0.00 (0.00-0.01)   | 0.00 (0.00-0.00)    | 0.167          | 137                   | 63                    |
| Range                       | 0.00-0.12          | 0.00-0.06           |                |                       |                       |
| <b>HDCA (frac. BA pool)</b> |                    |                     |                |                       |                       |
| Median (IQR)                | 0.00 (0.00-0.01)   | 0.00 (0.00-0.00)    | 0.005          | 137                   | 63                    |
| Range                       | 0.00-0.05          | 0.00-0.02           |                |                       |                       |
| <b>UDCA (frac. BA pool)</b> |                    |                     |                |                       |                       |
| Median (IQR)                | 0.03 (0.01-0.07)   | 0.01 (0.00-0.02)    | <0.001         | 137                   | 63                    |
| Range                       | 0.00-0.29          | 0.00-0.10           |                |                       |                       |
| <b>CA:CDCA ratio</b>        |                    |                     |                |                       |                       |
| Median (IQR)                | 0.50 (0.31-0.80)   | 1.17 (0.69-2.10)    | <0.001         | 137                   | 63                    |
| Range                       | 0.07-3.77          | 0.15-5.17           |                |                       |                       |
| <b>CA:DCA ratio</b>         |                    |                     |                |                       |                       |
| Median (IQR)                | 1.16 (0.45-5.25)   | 21.96 (3.34-129.27) | <0.001         | 102                   | 61                    |
| Range                       | 0.09-822.00        | 0.42-2002.00        |                |                       |                       |
| <b>CDCA:LCA+HDCA+UDCA</b>   |                    |                     |                |                       |                       |
| Median (IQR)                | 9.33 (4.00-23.00)  | 31.84 (13.96-109.2) | <0.001         | 129                   | 63                    |
| Range                       | 0.66-422.00        | 3.62-1310.00        |                |                       |                       |

NN PSC: Normal total bile acids, No UDCA treatment; HN PSC: High total bile acids, No UDCA treatment

**Supplementary Table 6.** Bile acids in NY and HY PSC patients.

|                            | NY PSC              | HY PSC              | p-value | NY PSC (n) | HY PSC (n) |
|----------------------------|---------------------|---------------------|---------|------------|------------|
| <b>Age in years</b>        |                     |                     |         |            |            |
| Median (IQR)               | 43.92 (33.74-54.55) | 49.13 (34.11-60.88) | 0.088   | 61         | 115        |
| Range                      | 10.13-72.71         | 10.74-77.56         |         |            |            |
| <b>Sex (% Male)</b>        | 50.8                | 60.9                | 0.199   | 61         | 115        |
| <b>Total BA</b>            |                     |                     |         |            |            |
| Median (IQR)               | 9.79 (6.73-14.02)   | 48.69 (28.84-116.7) | <0.001  | 61         | 115        |
| Range                      | 3.06-17.51          | 17.81-646.47        |         |            |            |
| <b>CA (total)</b>          |                     |                     |         |            |            |
| Median (IQR)               | 0.60 (0.31-1.28)    | 4.20 (1.89-13.54)   | <0.001  | 61         | 115        |
| Range                      | 0.04-5.47           | 0.34-192.53         |         |            |            |
| <b>CA (unconjugated)</b>   |                     |                     |         |            |            |
| Median (IQR)               | 0.04 (0.02-0.15)    | 0.07 (0.03-0.22)    | 0.061   | 61         | 115        |
| Range                      | 0.00-0.90           | 0.00-5.72           |         |            |            |
| <b>GCA</b>                 |                     |                     |         |            |            |
| Median (IQR)               | 0.35 (0.18-0.88)    | 3.33 (1.56-10.12)   | <0.001  | 61         | 115        |
| Range                      | 0.03-4.77           | 0.19-151.29         |         |            |            |
| <b>TCA</b>                 |                     |                     |         |            |            |
| Median (IQR)               | 0.05 (0.02-0.13)    | 0.53 (0.15-2.94)    | <0.001  | 61         | 115        |
| Range                      | 0.00-0.66           | 0.00-41.19          |         |            |            |
| <b>CDCA (total)</b>        |                     |                     |         |            |            |
| Median (IQR)               | 1.19 (0.73-1.92)    | 6.22 (3.96-16.37)   | <0.001  | 61         | 115        |
| Range                      | 0.18-4.58           | 1.05-141.73         |         |            |            |
| <b>CDCA (unconjugated)</b> |                     |                     |         |            |            |
| Median (IQR)               | 0.17 (0.07-0.44)    | 0.25 (0.08-0.66)    | 0.109   | 61         | 115        |
| Range                      | 0.01-1.73           | 0.01-7.27           |         |            |            |
| <b>GCDCA</b>               |                     |                     |         |            |            |
| Median (IQR)               | 0.85 (0.50-1.24)    | 4.73 (3.04-13.17)   | <0.001  | 61         | 115        |
| Range                      | 0.10-3.39           | 0.85-119.44         |         |            |            |
| <b>TCDCA</b>               |                     |                     |         |            |            |
| Median (IQR)               | 0.07 (0.04-0.18)    | 0.98 (0.35-3.01)    | <0.001  | 61         | 115        |
| Range                      | 0.01-0.79           | 0.04-27.78          |         |            |            |
| <b>DCA (total)</b>         |                     |                     |         |            |            |
| Median (IQR)               | 0.62 (0.09-1.22)    | 1.15 (0.22-2.71)    | <0.001  | 61         | 115        |
| Range                      | 0.00-3.35           | 0.00-18.32          |         |            |            |
| <b>DCA (unconjugated)</b>  |                     |                     |         |            |            |
| Median (IQR)               | 0.28 (0.04-0.56)    | 0.13 (0.01-0.51)    | 0.331   | 61         | 115        |
| Range                      | 0.00-1.32           | 0.00-2.92           |         |            |            |

|                            | NY PSC           | HY PSC              | p-value | NY PSC (n) | HY PSC (n) |
|----------------------------|------------------|---------------------|---------|------------|------------|
| <b>GDCA</b>                |                  |                     |         |            |            |
| Median (IQR)               | 0.19 (0.04-0.50) | 0.78 (0.14-1.82)    | <0.001  | 61         | 115        |
| Range                      | 0.00-2.10        | 0.00-15.49          |         |            |            |
| <b>TDCA</b>                |                  |                     |         |            |            |
| Median (IQR)               | 0.02 (0.00-0.08) | 0.15 (0.02-0.34)    | <0.001  | 61         | 115        |
| Range                      | 0.00-0.50        | 0.00-3.41           |         |            |            |
| <b>LCA (total)</b>         |                  |                     |         |            |            |
| Median (IQR)               | 0.09 (0.00-0.19) | 0.18 (0.02-0.66)    | 0.005   | 61         | 115        |
| Range                      | 0.00-0.53        | 0.00-2.85           |         |            |            |
| <b>LCA (unconjugated)</b>  |                  |                     |         |            |            |
| Median (IQR)               | 0.03 (0.00-0.07) | 0.05 (0.00-0.15)    | 0.060   | 61         | 115        |
| Range                      | 0.00-0.23        | 0.00-0.96           |         |            |            |
| <b>GLCA</b>                |                  |                     |         |            |            |
| Median (IQR)               | 0.04 (0.00-0.10) | 0.09 (0.01-0.36)    | 0.004   | 61         | 115        |
| Range                      | 0.00-0.28        | 0.00-2.14           |         |            |            |
| <b>TLCA</b>                |                  |                     |         |            |            |
| Median (IQR)               | 0.00 (0.00-0.01) | 0.01 (0.00-0.08)    | <0.001  | 61         | 115        |
| Range                      | 0.00-0.07        | 0.00-0.56           |         |            |            |
| <b>HDCA (total)</b>        |                  |                     |         |            |            |
| Median (IQR)               | 0.02 (0.00-0.05) | 0.01 (0.00-0.06)    | 0.841   | 61         | 115        |
| Range                      | 0.00-0.14        | 0.00-0.73           |         |            |            |
| <b>HDCA (unconjugated)</b> |                  |                     |         |            |            |
| Median (IQR)               | 0.01 (0.00-0.03) | 0.00 (0.00-0.03)    | 0.978   | 61         | 115        |
| Range                      | 0.00-0.07        | 0.00-0.15           |         |            |            |
| <b>GHDCA</b>               |                  |                     |         |            |            |
| Median (IQR)               | 0.00 (0.00-0.01) | 0.00 (0.00-0.01)    | 0.237   | 61         | 115        |
| Range                      | 0.00-0.10        | 0.00-0.73           |         |            |            |
| <b>THDCA</b>               |                  |                     |         |            |            |
| Median (IQR)               | 0.00 (0.00-0.00) | 0.00 (0.00-0.00)    | 0.036   | 61         | 115        |
| Range                      | 0.00-0.00        | 0.00-0.03           |         |            |            |
| <b>UDCA (total)</b>        |                  |                     |         |            |            |
| Median (IQR)               | 6.35 (4.51-9.24) | 31.10 (19.71-63.93) | <0.001  | 61         | 115        |
| Range                      | 2.15-14.82       | 8.87-537.71         |         |            |            |
| <b>UDCA (unconjugated)</b> |                  |                     |         |            |            |
| Median (IQR)               | 1.18 (0.60-2.54) | 3.87 (1.56-6.83)    | <0.001  | 61         | 115        |
| Range                      | 0.07-8.58        | 0.24-52.33          |         |            |            |
| <b>GUDCA</b>               |                  |                     |         |            |            |
| Median (IQR)               | 4.84 (2.79-6.50) | 27.12 (14.82-52.66) | <0.001  | 61         | 115        |
| Range                      | 1.36-9.59        | 2.72-472.47         |         |            |            |

|                               | NY PSC              | HY PSC             | p-value | NY PSC (n) | HY PSC (n) |
|-------------------------------|---------------------|--------------------|---------|------------|------------|
| <b>TUDCA</b>                  |                     |                    |         |            |            |
| Median (IQR)                  | 0.09 (0.06-0.18)    | 1.20 (0.49-3.75)   | <0.001  | 61         | 115        |
| Range                         | 0.02-0.92           | 0.09-51.06         |         |            |            |
| <b>Total BA (conj. frac.)</b> |                     |                    |         |            |            |
| Median (IQR)                  | 0.74 (0.63-0.87)    | 0.91 (0.82-0.97)   | <0.001  | 61         | 115        |
| Range                         | 0.28-0.99           | 0.37-1.00          |         |            |            |
| <b>CA (conj. frac.)</b>       |                     |                    |         |            |            |
| Median (IQR)                  | 0.90 (0.65-0.98)    | 0.99 (0.91-1.00)   | <0.001  | 61         | 115        |
| Range                         | 0.27-1.00           | 0.18-1.00          |         |            |            |
| <b>CDCA (conj. frac.)</b>     |                     |                    |         |            |            |
| Median (IQR)                  | 0.82 (0.69-0.94)    | 0.97 (0.90-0.99)   | <0.001  | 61         | 115        |
| Range                         | 0.37-0.99           | 0.39-1.00          |         |            |            |
| <b>DCA (conj. frac.)</b>      |                     |                    |         |            |            |
| Median (IQR)                  | 0.45 (0.29-0.63)    | 0.85 (0.69-0.94)   | <0.001  | 54         | 107        |
| Range                         | 0.00-1.00           | 0.00-1.00          |         |            |            |
| <b>LCA (conj. frac.)</b>      |                     |                    |         |            |            |
| Median (IQR)                  | 0.58 (0.49-0.75)    | 0.74 (0.63-0.84)   | <0.001  | 44         | 93         |
| Range                         | 0.25-1.00           | 0.00-1.00          |         |            |            |
| <b>HDCA (conj. frac.)</b>     |                     |                    |         |            |            |
| Median (IQR)                  | 0.22 (0.00-0.57)    | 0.11 (0.00-0.61)   | 0.986   | 36         | 71         |
| Range                         | 0.00-1.00           | 0.00-1.00          |         |            |            |
| <b>UDCA (conj. frac.)</b>     |                     |                    |         |            |            |
| Median (IQR)                  | 0.77 (0.65-0.88)    | 0.90 (0.79-0.97)   | <0.001  | 61         | 115        |
| Range                         | 0.27-0.99           | 0.28-1.00          |         |            |            |
| <b>Total BA (G:T ratio)</b>   |                     |                    |         |            |            |
| Median (IQR)                  | 21.59 (12.74-33.80) | 12.52 (7.62-23.15) | <0.001  | 61         | 115        |
| Range                         | 4.30-85.82          | 1.67-67.52         |         |            |            |
| <b>CA (G:T ratio)</b>         |                     |                    |         |            |            |
| Median (IQR)                  | 8.62 (5.64-12.70)   | 6.25 (3.93-10.48)  | 0.016   | 57         | 114        |
| Range                         | 2.59-26.00          | 0.62-30.00         |         |            |            |
| <b>CDCA (G:T ratio)</b>       |                     |                    |         |            |            |
| Median (IQR)                  | 9.17 (6.35-13.78)   | 6.28 (4.05-10.21)  | <0.001  | 61         | 115        |
| Range                         | 1.58-35.11          | 0.69-22.86         |         |            |            |
| <b>DCA (G:T ratio)</b>        |                     |                    |         |            |            |
| Median (IQR)                  | 8.31 (5.00-10.81)   | 6.02 (3.45-9.35)   | 0.011   | 44         | 94         |
| Range                         | 2.00-45.00          | 0.59-22.00         |         |            |            |
| <b>LCA (G:T ratio)</b>        |                     |                    |         |            |            |
| Median (IQR)                  | 5.60 (4.18-8.67)    | 4.25 (2.40-7.80)   | 0.277   | 23         | 65         |
| Range                         | 0.67-22.00          | 0.89-36.00         |         |            |            |

|                             | NY PSC              | HY PSC              | p-value | NY PSC (n) | HY PSC (n) |
|-----------------------------|---------------------|---------------------|---------|------------|------------|
| <b>HDCA (G:T ratio)</b>     |                     |                     |         |            |            |
| Median (IQR)                | na                  | 6.25 (3.88-8.62)    | na      | 0          | 2          |
| Range                       | na                  | 1.50-11.00          |         |            |            |
| <b>UDCA (G:T ratio)</b>     |                     |                     |         |            |            |
| Median (IQR)                | 46.45 (29.94-64.75) | 23.01 (13.57-38.67) | <0.001  | 61         | 115        |
| Range                       | 7.09-145.00         | 3.22-102.82         |         |            |            |
| <b>CA (frac. BA pool)</b>   |                     |                     |         |            |            |
| Median (IQR)                | 0.07 (0.03-0.12)    | 0.10 (0.05-0.17)    | 0.034   | 61         | 115        |
| Range                       | 0.00-0.39           | 0.01-0.44           |         |            |            |
| <b>CDCA (frac. BA pool)</b> |                     |                     |         |            |            |
| Median (IQR)                | 0.12 (0.10-0.17)    | 0.14 (0.11-0.19)    | 0.186   | 61         | 115        |
| Range                       | 0.04-0.40           | 0.04-0.42           |         |            |            |
| <b>DCA (frac. BA pool)</b>  |                     |                     |         |            |            |
| Median (IQR)                | 0.06 (0.01-0.12)    | 0.02 (0.00-0.06)    | 0.003   | 61         | 115        |
| Range                       | 0.00-0.26           | 0.00-0.21           |         |            |            |
| <b>LCA (frac. BA pool)</b>  |                     |                     |         |            |            |
| Median (IQR)                | 0.01 (0.00-0.02)    | 0.00 (0.00-0.01)    | 0.034   | 61         | 115        |
| Range                       | 0.00-0.08           | 0.00-0.04           |         |            |            |
| <b>HDCA (frac. BA pool)</b> |                     |                     |         |            |            |
| Median (IQR)                | 0.00 (0.00-0.00)    | 0.00 (0.00-0.00)    | 0.002   | 61         | 115        |
| Range                       | 0.00-0.01           | 0.00-0.01           |         |            |            |
| <b>UDCA (frac. BA pool)</b> |                     |                     |         |            |            |
| Median (IQR)                | 0.70 (0.59-0.77)    | 0.68 (0.59-0.77)    | 0.873   | 61         | 115        |
| Range                       | 0.42-0.89           | 0.40-0.91           |         |            |            |
| <b>CA:CDCA ratio</b>        |                     |                     |         |            |            |
| Median (IQR)                | 0.51 (0.33-0.75)    | 0.57 (0.38-1.09)    | 0.068   | 61         | 115        |
| Range                       | 0.05-3.09           | 0.06-4.43           |         |            |            |
| <b>CA:DCA ratio</b>         |                     |                     |         |            |            |
| Median (IQR)                | 0.73 (0.29-3.27)    | 3.37 (1.03-31.84)   | <0.001  | 54         | 107        |
| Range                       | 0.09-305.00         | 0.19-1681.00        |         |            |            |
| <b>CDCA:LCA+HDCA+UDCA</b>   |                     |                     |         |            |            |
| Median (IQR)                | 0.20 (0.14-0.27)    | 0.21 (0.15-0.31)    | 0.260   | 61         | 115        |
| Range                       | 0.04-0.94           | 0.04-0.97           |         |            |            |

NY PSC: Normal total bile acids, Yes UDCA treatment; HY PSC: High total bile acids, Yes UDCA treatment



**Supplementary Table 7.** Bile acids in Control and No IBD PSC patients.

|                            | <b>Control</b>      | <b>No IBD PSC</b>   | <b>p-value</b> | <b>Con (n)</b> | <b>No IBD PSC (n)</b> |
|----------------------------|---------------------|---------------------|----------------|----------------|-----------------------|
| <b>Age in years</b>        |                     |                     |                |                |                       |
| Median (IQR)               | 56.40 (48.49-65.29) | 55.82 (43.32-61.82) | 0.032          | 302            | 65                    |
| Range                      | 19.28-86.12         | 14.25-79.68         |                |                |                       |
| <b>Sex (% Male)</b>        | 58.3                | 49.2                | 0.182          | 302            | 65                    |
| <b>Tot BA / UDCA Group</b> |                     |                     |                |                |                       |
| <b>NN - # (%)</b>          | na                  | 19 (29.2)           | na             | na             | 65                    |
| <b>NY - # (%)</b>          | na                  | 10 (15.4)           |                |                |                       |
| <b>HN - # (%)</b>          | na                  | 13 (20.0)           |                |                |                       |
| <b>HY - # (%)</b>          | na                  | 23 (35.4)           |                |                |                       |
| <b>Total BA</b>            |                     |                     |                |                |                       |
| Median (IQR)               | 1.90 (1.02-3.52)    | 23.57 (7.71-45.45)  | <0.001         | 302            | 65                    |
| Range                      | 0.19-17.79          | 0.88-646.47         |                |                |                       |
| <b>CA (total)</b>          |                     |                     |                |                |                       |
| Median (IQR)               | 0.22 (0.11-0.49)    | 1.84 (0.86-8.72)    | <0.001         | 302            | 65                    |
| Range                      | 0.01-6.43           | 0.13-68.19          |                |                |                       |
| <b>CA (unconjugated)</b>   |                     |                     |                |                |                       |
| Median (IQR)               | 0.04 (0.02-0.12)    | 0.05 (0.03-0.12)    | 0.169          | 302            | 65                    |
| Range                      | 0.00-5.23           | 0.00-4.02           |                |                |                       |
| <b>GCA</b>                 |                     |                     |                |                |                       |
| Median (IQR)               | 0.12 (0.05-0.25)    | 1.11 (0.45-5.13)    | <0.001         | 302            | 65                    |
| Range                      | 0.01-5.84           | 0.06-53.99          |                |                |                       |
| <b>TCA</b>                 |                     |                     |                |                |                       |
| Median (IQR)               | 0.02 (0.01-0.04)    | 0.30 (0.07-2.09)    | <0.001         | 302            | 65                    |
| Range                      | 0.00-1.50           | 0.00-30.29          |                |                |                       |
| <b>CDCA (total)</b>        |                     |                     |                |                |                       |
| Median (IQR)               | 0.63 (0.33-1.39)    | 3.85 (2.14-9.80)    | <0.001         | 302            | 65                    |
| Range                      | 0.05-10.77          | 0.30-141.73         |                |                |                       |
| <b>CDCA (unconjugated)</b> |                     |                     |                |                |                       |
| Median (IQR)               | 0.07 (0.03-0.23)    | 0.16 (0.05-0.47)    | <0.001         | 302            | 65                    |
| Range                      | 0.00-5.28           | 0.01-7.27           |                |                |                       |
| <b>GCDCA</b>               |                     |                     |                |                |                       |
| Median (IQR)               | 0.42 (0.21-0.88)    | 2.99 (1.32-6.33)    | <0.001         | 302            | 65                    |
| Range                      | 0.02-5.38           | 0.18-119.44         |                |                |                       |
| <b>TCDC</b>                |                     |                     |                |                |                       |
| Median (IQR)               | 0.05 (0.03-0.11)    | 0.56 (0.16-2.77)    | <0.001         | 302            | 65                    |
| Range                      | 0.00-2.49           | 0.02-42.03          |                |                |                       |

|                            | Control          | No IBD PSC        | p-value | Con (n) | No IBD PSC (n) |
|----------------------------|------------------|-------------------|---------|---------|----------------|
| <b>DCA (total)</b>         |                  |                   |         |         |                |
| Median (IQR)               | 0.65 (0.36-1.21) | 1.43 (0.76-2.23)  | <0.001  | 302     | 65             |
| Range                      | 0.00-8.26        | 0.00-24.36        |         |         |                |
| <b>DCA (unconjugated)</b>  |                  |                   |         |         |                |
| Median (IQR)               | 0.33 (0.19-0.58) | 0.29 (0.09-0.65)  | 0.263   | 302     | 65             |
| Range                      | 0.00-4.49        | 0.00-3.63         |         |         |                |
| <b>GDCA</b>                |                  |                   |         |         |                |
| Median (IQR)               | 0.21 (0.10-0.46) | 0.64 (0.35-1.07)  | <0.001  | 302     | 65             |
| Range                      | 0.00-5.94        | 0.00-15.49        |         |         |                |
| <b>TDCA</b>                |                  |                   |         |         |                |
| Median (IQR)               | 0.04 (0.02-0.08) | 0.15 (0.05-0.31)  | <0.001  | 302     | 65             |
| Range                      | 0.00-1.13        | 0.00-8.55         |         |         |                |
| <b>LCA (total)</b>         |                  |                   |         |         |                |
| Median (IQR)               | 0.03 (0.02-0.05) | 0.10 (0.06-0.21)  | <0.001  | 302     | 65             |
| Range                      | 0.00-0.42        | 0.00-2.85         |         |         |                |
| <b>LCA (unconjugated)</b>  |                  |                   |         |         |                |
| Median (IQR)               | 0.01 (0.01-0.02) | 0.03 (0.01-0.07)  | <0.001  | 302     | 65             |
| Range                      | 0.00-0.21        | 0.00-0.29         |         |         |                |
| <b>GLCA</b>                |                  |                   |         |         |                |
| Median (IQR)               | 0.01 (0.01-0.02) | 0.05 (0.02-0.13)  | <0.001  | 302     | 65             |
| Range                      | 0.00-0.19        | 0.00-2.14         |         |         |                |
| <b>TLCA</b>                |                  |                   |         |         |                |
| Median (IQR)               | 0.00 (0.00-0.01) | 0.01 (0.00-0.03)  | <0.001  | 302     | 65             |
| Range                      | 0.00-0.07        | 0.00-0.42         |         |         |                |
| <b>HDCA (total)</b>        |                  |                   |         |         |                |
| Median (IQR)               | 0.03 (0.01-0.05) | 0.02 (0.00-0.05)  | 0.322   | 302     | 65             |
| Range                      | 0.00-0.29        | 0.00-0.17         |         |         |                |
| <b>HDCA (unconjugated)</b> |                  |                   |         |         |                |
| Median (IQR)               | 0.02 (0.01-0.03) | 0.02 (0.00-0.04)  | 0.448   | 302     | 65             |
| Range                      | 0.00-0.11        | 0.00-0.13         |         |         |                |
| <b>GHDCa</b>               |                  |                   |         |         |                |
| Median (IQR)               | 0.00 (0.00-0.01) | 0.00 (0.00-0.00)  | 0.003   | 302     | 65             |
| Range                      | 0.00-0.11        | 0.00-0.06         |         |         |                |
| <b>THDCa</b>               |                  |                   |         |         |                |
| Median (IQR)               | 0.00 (0.00-0.00) | 0.00 (0.00-0.00)  | <0.001  | 302     | 65             |
| Range                      | 0.00-0.09        | 0.00-0.07         |         |         |                |
| <b>UDCA (total)</b>        |                  |                   |         |         |                |
| Median (IQR)               | 0.13 (0.07-0.27) | 3.33 (0.29-18.37) | <0.001  | 302     | 65             |
| Range                      | 0.00-2.15        | 0.02-537.71       |         |         |                |

|                               | Control           | No IBD PSC        | p-value | Con (n) | No IBD PSC (n) |
|-------------------------------|-------------------|-------------------|---------|---------|----------------|
| <b>UDCA (unconjugated)</b>    |                   |                   |         |         |                |
| Median (IQR)                  | 0.02 (0.01-0.06)  | 0.12 (0.02-2.29)  | <0.001  | 302     | 65             |
| Range                         | 0.00-0.92         | 0.00-52.33        |         |         |                |
| <b>GUDCA</b>                  |                   |                   |         |         |                |
| Median (IQR)                  | 0.09 (0.05-0.19)  | 1.73 (0.24-15.78) | <0.001  | 302     | 65             |
| Range                         | 0.00-1.78         | 0.01-472.47)      |         |         |                |
| <b>TUDCA</b>                  |                   |                   |         |         |                |
| Median (IQR)                  | 0.01 (0.00-0.01)  | 0.14 (0.03-0.52)  | <0.001  | 302     | 65             |
| Range                         | 0.00-0.25         | 0.00-35.47        |         |         |                |
| <b>Total BA (conj. frac.)</b> |                   |                   |         |         |                |
| Median (IQR)                  | 0.64 (0.49-0.79)  | 0.92 (0.74-0.98)  | <0.001  | 302     | 65             |
| Range                         | 0.11-0.97         | 0.20-1.00         |         |         |                |
| <b>CA (conj. frac.)</b>       |                   |                   |         |         |                |
| Median (IQR)                  | 0.75 (0.53-0.89)  | 0.97 (0.83-1.00)  | <0.001  | 302     | 65             |
| Range                         | 0.02-1.00         | 0.09-1.00         |         |         |                |
| <b>CDCA (conj. frac.)</b>     |                   |                   |         |         |                |
| Median (IQR)                  | 0.87 (0.70-0.94)  | 0.96 (0.79-0.99)  | <0.001  | 302     | 65             |
| Range                         | 0.19-1.00         | 0.29-1.00         |         |         |                |
| <b>DCA (conj. frac.)</b>      |                   |                   |         |         |                |
| Median (IQR)                  | 0.44 (0.29-0.60)  | 0.78 (0.52-0.93)  | <0.001  | 299     | 63             |
| Range                         | 0.00-1.00         | 0.18-1.00         |         |         |                |
| <b>LCA (conj. frac.)</b>      |                   |                   |         |         |                |
| Median (IQR)                  | 0.50 (0.40-0.69)  | 0.71 (0.54-0.80)  | <0.001  | 274     | 62             |
| Range                         | 0.00-1.00         | 0.00-1.00         |         |         |                |
| <b>HDCA (conj. frac.)</b>     |                   |                   |         |         |                |
| Median (IQR)                  | 0.20 (0.00-0.50)  | 0.00 (0.00-0.41)  | 0.275   | 261     | 48             |
| Range                         | 0.00-1.00         | 0.00-1.00         |         |         |                |
| <b>UDCA (conj. frac.)</b>     |                   |                   |         |         |                |
| Median (IQR)                  | 0.83 (0.67-0.94)  | 0.90 (0.75-0.97)  | 0.068   | 301     | 65             |
| Range                         | 0.00-1.00         | 0.28-1.00         |         |         |                |
| <b>Total BA (G:T ratio)</b>   |                   |                   |         |         |                |
| Median (IQR)                  | 7.66 (4.89-11.17) | 8.09 (2.80-18.65) | 0.959   | 300     | 65             |
| Range                         | 0.91-139.00       | 0.62-69.38        |         |         |                |
| <b>CA (G:T ratio)</b>         |                   |                   |         |         |                |
| Median (IQR)                  | 6.00 (3.50-9.00)  | 5.12 (2.33-9.54)  | 0.171   | 263     | 64             |
| Range                         | 0.83-31.00        | 0.50-27.00        |         |         |                |
| <b>CDCA (G:T ratio)</b>       |                   |                   |         |         |                |
| Median (IQR)                  | 8.00 (5.33-12.13) | 5.43 (2.37-9.74)  | <0.001  | 298     | 65             |
| Range                         | 1.00-100.00       | 0.67-35.50        |         |         |                |

|                             | Control            | No IBD PSC         | p-value | Con (n) | No IBD PSC (n) |
|-----------------------------|--------------------|--------------------|---------|---------|----------------|
| <b>DCA (G:T ratio)</b>      |                    |                    |         |         |                |
| Median (IQR)                | 5.50 (3.74-8.00)   | 5.09 (2.17-8.60)   | 0.263   | 272     | 61             |
| Range                       | 0.50-61.00         | 0.50-45.00         |         |         |                |
| <b>LCA (G:T ratio)</b>      |                    |                    |         |         |                |
| Median (IQR)                | 2.00 (1.00-4.25)   | 3.00 (1.50-7.00)   | 0.062   | 79      | 37             |
| Range                       | 0.50-13.00         | 0.50-36.00         |         |         |                |
| <b>HDCA (G:T ratio)</b>     |                    |                    |         |         |                |
| Median (IQR)                | 1.22 (1.00-3.00)   | 0.71 (0.71-0.71)   | 0.137   | 5       | 1              |
| Range                       | 1.00-4.00          | 0.71-0.71          |         |         |                |
| <b>UDCA (G:T ratio)</b>     |                    |                    |         |         |                |
| Median (IQR)                | 10.00 (5.00-18.00) | 13.81 (6.47-31.96) | 0.073   | 177     | 59             |
| Range                       | 1.00-95.00         | 0.14-101.14        |         |         |                |
| <b>CA (frac. BA pool)</b>   |                    |                    |         |         |                |
| Median (IQR)                | 0.13 (0.08-0.17)   | 0.12 (0.05-0.28)   | 0.691   | 302     | 65             |
| Range                       | 0.02-0.55          | 0.01-0.79          |         |         |                |
| <b>CDCA (frac. BA pool)</b> |                    |                    |         |         |                |
| Median (IQR)                | 0.35 (0.27-0.45)   | 0.23 (0.13-0.38)   | <0.001  | 302     | 65             |
| Range                       | 0.06-0.75          | 0.04-0.79          |         |         |                |
| <b>DCA (frac. BA pool)</b>  |                    |                    |         |         |                |
| Median (IQR)                | 0.37 (0.24-0.47)   | 0.08 (0.03-0.19)   | <0.001  | 302     | 65             |
| Range                       | 0.00-0.78          | 0.00-0.64          |         |         |                |
| <b>LCA (frac. BA pool)</b>  |                    |                    |         |         |                |
| Median (IQR)                | 0.02 (0.01-0.03)   | 0.01 (0.00-0.01)   | <0.001  | 302     | 65             |
| Range                       | 0.00-0.13          | 0.00-0.04          |         |         |                |
| <b>HDCA (frac. BA pool)</b> |                    |                    |         |         |                |
| Median (IQR)                | 0.01 (0.01-0.02)   | 0.00 (0.00-0.00)   | <0.001  | 302     | 65             |
| Range                       | 0.00-0.14          | 0.00-0.03          |         |         |                |
| <b>UDCA (frac. BA pool)</b> |                    |                    |         |         |                |
| Median (IQR)                | 0.07 (0.04-0.12)   | 0.43 (0.02-0.70)   | 0.024   | 302     | 65             |
| Range                       | 0.00-0.39          | 0.00-0.89          |         |         |                |
| <b>CA:CDCA ratio</b>        |                    |                    |         |         |                |
| Median (IQR)                | 0.38 (0.24-0.54)   | 0.51 (0.30-0.91)   | 0.002   | 302     | 65             |
| Range                       | 0.06-3.10          | 0.06-5.17          |         |         |                |
| <b>CA:DCA ratio</b>         |                    |                    |         |         |                |
| Median (IQR)                | 0.36 (0.19-0.73)   | 1.18 (0.44-5.94)   | <0.001  | 299     | 63             |
| Range                       | 0.04-103.00        | 0.12-698.25        |         |         |                |
| <b>CDCA:LCA+HDCA+UDCA</b>   |                    |                    |         |         |                |
| Median (IQR)                | 3.00 (1.78-5.07)   | 0.48 (0.19-11.13)  | 0.031   | 302     | 65             |
| Range                       | 0.44-35.00         | 0.05-414.18        |         |         |                |

**Supplementary Table 8.** Bile acids in No IBD and UC PSC patients.

|                            | No IBD PSC          | UC PSC              | p-value | No IBD PSC (n) | UC PSC (n) |
|----------------------------|---------------------|---------------------|---------|----------------|------------|
| <b>Age in years</b>        |                     |                     |         |                |            |
| Median (IQR)               | 55.82 (43.32-61.82) | 47.61 (31.69-61.33) | 0.044   | 65             | 231        |
| Range                      | 14.25-79.68         | 10.74-77.56         |         |                |            |
| <b>Sex (% Male)</b>        |                     |                     |         |                |            |
|                            | 49.2                | 61.9                | 0.066   | 65             | 231        |
| <b>Tot BA / UDCA Group</b> |                     |                     |         |                |            |
| <b>NN - # (%)</b>          | 19 (29.2)           | 83 (35.9)           | 0.706   | 65             | 231        |
| <b>NY - # (%)</b>          | 10 (15.4)           | 38 (16.5)           |         |                |            |
| <b>HN - # (%)</b>          | 13 (20.0)           | 37 (16.0)           |         |                |            |
| <b>HY - # (%)</b>          | 23 (35.4)           | 73 (31.6)           |         |                |            |
| <b>Total BA</b>            |                     |                     |         |                |            |
| Median (IQR)               | 23.57 (7.71-45.45)  | 15.93 (5.90-39.39)  | 0.206   | 65             | 231        |
| Range                      | 0.88-646.47         | 1.00-530.95         |         |                |            |
| <b>CA (total)</b>          |                     |                     |         |                |            |
| Median (IQR)               | 1.84 (0.86-8.72)    | 2.21 (0.81-8.82)    | 0.691   | 65             | 231        |
| Range                      | 0.13-68.19          | 0.04-224.36         |         |                |            |
| <b>CA (unconjugated)</b>   |                     |                     |         |                |            |
| Median (IQR)               | 0.05 (0.03-0.12)    | 0.07 (0.03-0.24)    | 0.244   | 65             | 231        |
| Range                      | 0.00-4.02           | 0.00-10.65          |         |                |            |
| <b>GCA</b>                 |                     |                     |         |                |            |
| Median (IQR)               | 1.11 (0.45-5.13)    | 1.74 (0.51-5.36)    | 0.682   | 65             | 231        |
| Range                      | 0.06-53.99          | 0.03-165.50         |         |                |            |
| <b>TCA</b>                 |                     |                     |         |                |            |
| Median (IQR)               | 0.30 (0.07-2.09)    | 0.25 (0.07-1.67)    | 0.957   | 65             | 231        |
| Range                      | 0.00-30.29          | 0.00-58.61          |         |                |            |
| <b>CDCA (total)</b>        |                     |                     |         |                |            |
| Median (IQR)               | 3.85 (2.14-9.80)    | 3.91 (1.52-9.02)    | 0.426   | 65             | 231        |
| Range                      | 0.30-141.73         | 0.29-120.63)        |         |                |            |
| <b>CDCA (unconjugated)</b> |                     |                     |         |                |            |
| Median (IQR)               | 0.16 (0.05-0.47)    | 0.14 (0.06-0.38)    | 0.539   | 65             | 231        |
| Range                      | 0.01-7.27           | 0.00-14.78          |         |                |            |
| <b>GCDCA</b>               |                     |                     |         |                |            |
| Median (IQR)               | 2.99 (1.32-6.33)    | 2.71 (1.14-6.53)    | 0.648   | 65             | 231        |
| Range                      | 0.18-119.44         | 0.21-92.80          |         |                |            |
| <b>TCDCA</b>               |                     |                     |         |                |            |
| Median (IQR)               | 0.56 (0.16-2.77)    | 0.45 (0.13-1.71)    | 0.360   | 65             | 231        |
| Range                      | 0.02-42.03          | 0.01-35.85          |         |                |            |

|                            | No IBD PSC        | UC PSC            | p-value | No IBD PSC (n) | UC PSC (n) |
|----------------------------|-------------------|-------------------|---------|----------------|------------|
| <b>DCA (total)</b>         |                   |                   |         |                |            |
| Median (IQR)               | 1.43 (0.76-2.23)  | 0.48 (0.01-1.54)  | <0.001  | 65             | 231        |
| Range                      | 0.00-24.36        | 0.00-16.23        |         |                |            |
| <b>DCA (unconjugated)</b>  |                   |                   |         |                |            |
| Median (IQR)               | 0.29 (0.09-0.65)  | 0.06 (0.00-0.41)  | <0.001  | 65             | 231        |
| Range                      | 0.00-3.63         | 0.00-5.99         |         |                |            |
| <b>GDCA</b>                |                   |                   |         |                |            |
| Median (IQR)               | 0.64 (0.35-1.07)  | 0.19 (0.01-0.84)  | <0.001  | 65             | 231        |
| Range                      | 0.00-15.49        | 0.00-10.84        |         |                |            |
| <b>TDCA</b>                |                   |                   |         |                |            |
| Median (IQR)               | 0.15 (0.05-0.31)  | 0.04 (0.00-0.18)  | <0.001  | 65             | 231        |
| Range                      | 0.00-8.55         | 0.00-4.02         |         |                |            |
| <b>LCA (total)</b>         |                   |                   |         |                |            |
| Median (IQR)               | 0.10 (0.06-0.21)  | 0.03 (0.00-0.14)  | <0.001  | 65             | 231        |
| Range                      | 0.00-2.85         | 0.00-2.18         |         |                |            |
| <b>LCA (unconjugated)</b>  |                   |                   |         |                |            |
| Median (IQR)               | 0.03 (0.01-0.07)  | 0.01 (0.00-0.04)  | <0.001  | 65             | 231        |
| Range                      | 0.00-0.29         | 0.00-0.88         |         |                |            |
| <b>GLCA</b>                |                   |                   |         |                |            |
| Median (IQR)               | 0.05 (0.02-0.13)  | 0.01 (0.00-0.08)  | <0.001  | 65             | 231        |
| Range                      | 0.00-2.14         | 0.00-1.63         |         |                |            |
| <b>TLCA</b>                |                   |                   |         |                |            |
| Median (IQR)               | 0.01 (0.00-0.03)  | 0.00 (0.00-0.01)  | 0.009   | 65             | 231        |
| Range                      | 0.00-0.42         | 0.00-0.43         |         |                |            |
| <b>HDCA (total)</b>        |                   |                   |         |                |            |
| Median (IQR)               | 0.02 (0.00-0.05)  | 0.01 (0.00-0.04)  | 0.006   | 65             | 231        |
| Range                      | 0.00-0.17         | 0.00-0.28         |         |                |            |
| <b>HDCA (unconjugated)</b> |                   |                   |         |                |            |
| Median (IQR)               | 0.02 (0.00-0.04)  | 0.00 (0.00-0.02)  | 0.001   | 65             | 231        |
| Range                      | 0.00-0.13         | 0.00-0.14         |         |                |            |
| <b>GHDCA</b>               |                   |                   |         |                |            |
| Median (IQR)               | 0.00 (0.00-0.00)  | 0.00 (0.00-0.01)  | 0.372   | 65             | 231        |
| Range                      | 0.00-0.06         | 0.00-0.17         |         |                |            |
| <b>THDCA</b>               |                   |                   |         |                |            |
| Median (IQR)               | 0.00 (0.00-0.00)  | 0.00 (0.00-0.00)  | 0.051   | 65             | 231        |
| Range                      | 0.00-0.07         | 0.00-0.05         |         |                |            |
| <b>UDCA (total)</b>        |                   |                   |         |                |            |
| Median (IQR)               | 3.33 (0.29-18.37) | 1.82 (0.13-18.98) | 0.163   | 65             | 231        |
| Range                      | 0.02-537.71       | 0.00-355.15       |         |                |            |

|                               | No IBD PSC        | UC PSC            | p-value | No IBD PSC (n) | UC PSC (n) |
|-------------------------------|-------------------|-------------------|---------|----------------|------------|
| <b>UDCA (unconjugated)</b>    |                   |                   |         |                |            |
| Median (IQR)                  | 0.12 (0.02-2.29)  | 0.17 (0.01-2.25)  | 0.328   | 65             | 231        |
| Range                         | 0.00-52.33        | 0.00-19.26        |         |                |            |
| <b>GUDCA</b>                  |                   |                   |         |                |            |
| Median (IQR)                  | 1.73 (0.24-15.78) | 1.31 (0.09-13.86) | 0.200   | 65             | 231        |
| Range                         | 0.01-472.47)      | 0.00-297.47       |         |                |            |
| <b>TUDCA</b>                  |                   |                   |         |                |            |
| Median (IQR)                  | 0.14 (0.03-0.52)  | 0.08 (0.01-0.53)  | 0.072   | 65             | 231        |
| Range                         | 0.00-35.47        | 0.00-51.06        |         |                |            |
| <b>Total BA (conj. frac.)</b> |                   |                   |         |                |            |
| Median (IQR)                  | 0.92 (0.74-0.98)  | 0.90 (0.76-0.98)  | 0.855   | 65             | 231        |
| Range                         | 0.20-1.00         | 0.24-1.00         |         |                |            |
| <b>CA (conj. frac.)</b>       |                   |                   |         |                |            |
| Median (IQR)                  | 0.97 (0.83-1.00)  | 0.97 (0.85-0.99)  | 0.652   | 65             | 231        |
| Range                         | 0.09-1.00         | 0.18-1.00         |         |                |            |
| <b>CDCA (conj. frac.)</b>     |                   |                   |         |                |            |
| Median (IQR)                  | 0.96 (0.79-0.99)  | 0.95 (0.85-0.99)  | 0.961   | 65             | 231        |
| Range                         | 0.29-1.00         | 0.24-1.00         |         |                |            |
| <b>DCA (conj. frac.)</b>      |                   |                   |         |                |            |
| Median (IQR)                  | 0.78 (0.52-0.93)  | 0.81 (0.55-0.96)  | 0.307   | 63             | 187        |
| Range                         | 0.18-1.00         | 0.00-1.00         |         |                |            |
| <b>LCA (conj. frac.)</b>      |                   |                   |         |                |            |
| Median (IQR)                  | 0.71 (0.54-0.80)  | 0.75 (0.57-0.87)  | 0.089   | 62             | 146        |
| Range                         | 0.00-1.00         | 0.00-1.00         |         |                |            |
| <b>HDCA (conj. frac.)</b>     |                   |                   |         |                |            |
| Median (IQR)                  | 0.00 (0.00-0.41)  | 0.33 (0.00-0.61)  | 0.020   | 48             | 121        |
| Range                         | 0.00-1.00         | 0.00-1.00         |         |                |            |
| <b>UDCA (conj. frac.)</b>     |                   |                   |         |                |            |
| Median (IQR)                  | 0.90 (0.75-0.97)  | 0.90 (0.77-0.98)  | 0.790   | 65             | 225        |
| Range                         | 0.28-1.00         | 0.00-1.00         |         |                |            |
| <b>Total BA (G:T ratio)</b>   |                   |                   |         |                |            |
| Median (IQR)                  | 8.09 (2.80-18.65) | 9.01 (4.08-18.02) | 0.578   | 65             | 231        |
| Range                         | 0.62-69.38        | 0.37-67.52        |         |                |            |
| <b>CA (G:T ratio)</b>         |                   |                   |         |                |            |
| Median (IQR)                  | 5.12 (2.33-9.54)  | 6.00 (3.08-9.56)  | 0.311   | 64             | 230        |
| Range                         | 0.50-27.00        | 0.27-30.00        |         |                |            |
| <b>CDCA (G:T ratio)</b>       |                   |                   |         |                |            |
| Median (IQR)                  | 5.43 (2.37-9.74)  | 6.28 (2.93-10.32) | 0.247   | 65             | 231        |
| Range                         | 0.67-35.50        | 0.36-51.00        |         |                |            |

|                             | No IBD PSC         | UC PSC             | p-value | No IBD PSC (n) | UC PSC (n) |
|-----------------------------|--------------------|--------------------|---------|----------------|------------|
| <b>DCA (G:T ratio)</b>      |                    |                    |         |                |            |
| Median (IQR)                | 5.09 (2.17-8.60)   | 4.69 (1.96-9.00)   | 0.648   | 61             | 153        |
| Range                       | 0.50-45.00         | 0.29-44.50         |         |                |            |
| <b>LCA (G:T ratio)</b>      |                    |                    |         |                |            |
| Median (IQR)                | 3.00 (1.50-7.00)   | 3.00 (1.80-7.00)   | 0.881   | 37             | 91         |
| Range                       | 0.50-36.00         | 0.10-25.00         |         |                |            |
| <b>HDCA (G:T ratio)</b>     |                    |                    |         |                |            |
| Median (IQR)                | 0.71 (0.71-0.71)   | 1.40 (1.00-4.00)   | 0.143   | 1              | 5          |
| Range                       | 0.71-0.71          | 0.75-11.00         |         |                |            |
| <b>UDCA (G:T ratio)</b>     |                    |                    |         |                |            |
| Median (IQR)                | 13.81 (6.47-31.96) | 20.23 (7.58-37.57) | 0.324   | 59             | 185        |
| Range                       | 0.14-101.14        | 0.33-124.00        |         |                |            |
| <b>CA (frac. BA pool)</b>   |                    |                    |         |                |            |
| Median (IQR)                | 0.12 (0.05-0.28)   | 0.19 (0.10-0.38)   | 0.022   | 65             | 231        |
| Range                       | 0.01-0.79          | 0.00-0.79          |         |                |            |
| <b>CDCA (frac. BA pool)</b> |                    |                    |         |                |            |
| Median (IQR)                | 0.23 (0.13-0.38)   | 0.28 (0.14-0.47)   | 0.211   | 65             | 231        |
| Range                       | 0.04-0.79          | 0.04-0.83          |         |                |            |
| <b>DCA (frac. BA pool)</b>  |                    |                    |         |                |            |
| Median (IQR)                | 0.08 (0.03-0.19)   | 0.02 (0.00-0.12)   | <0.001  | 65             | 231        |
| Range                       | 0.00-0.64          | 0.00-0.56          |         |                |            |
| <b>LCA (frac. BA pool)</b>  |                    |                    |         |                |            |
| Median (IQR)                | 0.01 (0.00-0.01)   | 0.00 (0.00-0.01)   | <0.001  | 65             | 231        |
| Range                       | 0.00-0.04          | 0.00-0.08          |         |                |            |
| <b>HDCA (frac. BA pool)</b> |                    |                    |         |                |            |
| Median (IQR)                | 0.00 (0.00-0.00)   | 0.00 (0.00-0.00)   | 0.005   | 65             | 231        |
| Range                       | 0.00-0.03          | 0.00-0.04          |         |                |            |
| <b>UDCA (frac. BA pool)</b> |                    |                    |         |                |            |
| Median (IQR)                | 0.43 (0.02-0.70)   | 0.18 (0.01-0.67)   | 0.226   | 65             | 231        |
| Range                       | 0.00-0.89          | 0.00-0.91          |         |                |            |
| <b>CA:CDCA ratio</b>        |                    |                    |         |                |            |
| Median (IQR)                | 0.51 (0.30-0.91)   | 0.67 (0.40-1.16)   | 0.012   | 65             | 231        |
| Range                       | 0.06-5.17          | 0.05-4.43          |         |                |            |
| <b>CA:DCA ratio</b>         |                    |                    |         |                |            |
| Median (IQR)                | 1.18 (0.44-5.94)   | 3.12 (0.90-60.92)  | <0.001  | 63             | 187        |
| Range                       | 0.12-698.25        | 0.09-2002.00       |         |                |            |
| <b>CDCA:LCA+HDCA+UDCA</b>   |                    |                    |         |                |            |
| Median (IQR)                | 0.48 (0.19-11.13)  | 1.44 (0.21-18.25)  | 0.317   | 65             | 225        |
| Range                       | 0.05-414.18        | 0.04-1310.00       |         |                |            |



**Supplementary Table 9.** Bile acids in No IBD and CD PSC patients.

|                            | No IBD PSC          | CD PSC              | p-value | No IBD PSC (n) | CD PSC (n) |
|----------------------------|---------------------|---------------------|---------|----------------|------------|
| <b>Age in years</b>        |                     |                     |         |                |            |
| Median (IQR)               | 55.82 (43.32-61.82) | 48.17 (38.38-55.93) | 0.150   | 65             | 26         |
| Range                      | 14.25-79.68         | 10.13-71.10         |         |                |            |
| <b>Sex (% Male)</b>        | 49.2                | 38.5                | 0.352   | 65             | 26         |
| <b>Tot BA / UDCA Group</b> |                     |                     |         |                |            |
| <b>NN - # (%)</b>          | 19 (29.2)           | 17 (65.4)           | 0.003   | 65             | 26         |
| <b>NY - # (%)</b>          | 10 (15.4)           | 5 (19.2)            |         |                |            |
| <b>HN - # (%)</b>          | 13 (20.0)           | 3 (11.5)            |         |                |            |
| <b>HY - # (%)</b>          | 23 (35.4)           | 1 (3.8)             |         |                |            |
| <b>Total BA</b>            |                     |                     |         |                |            |
| Median (IQR)               | 23.57 (7.71-45.45)  | 6.79 (3.08-12.15)   | <0.001  | 65             | 26         |
| Range                      | 0.88-646.47         | 0.59-124.14         |         |                |            |
| <b>CA (total)</b>          |                     |                     |         |                |            |
| Median (IQR)               | 1.84 (0.86-8.72)    | 0.98 (0.41-1.54)    | 0.015   | 65             | 26         |
| Range                      | 0.13-68.19          | 0.04-31.62          |         |                |            |
| <b>CA (unconjugated)</b>   |                     |                     |         |                |            |
| Median (IQR)               | 0.05 (0.03-0.12)    | 0.12 (0.03-0.28)    | 0.127   | 65             | 26         |
| Range                      | 0.00-4.02           | 0.01-0.76           |         |                |            |
| <b>GCA</b>                 |                     |                     |         |                |            |
| Median (IQR)               | 1.11 (0.45-5.13)    | 0.54 (0.16-1.24)    | 0.009   | 65             | 26         |
| Range                      | 0.06-53.99          | 0.02-19.29          |         |                |            |
| <b>TCA</b>                 |                     |                     |         |                |            |
| Median (IQR)               | 0.30 (0.07-2.09)    | 0.07 (0.02-0.22)    | 0.010   | 65             | 26         |
| Range                      | 0.00-30.29          | 0.00-20.10          |         |                |            |
| <b>CDCA (total)</b>        |                     |                     |         |                |            |
| Median (IQR)               | 3.85 (2.14-9.80)    | 2.21 (0.91-4.99)    | 0.021   | 65             | 26         |
| Range                      | 0.30-141.73         | 0.16-24.66          |         |                |            |
| <b>CDCA (unconjugated)</b> |                     |                     |         |                |            |
| Median (IQR)               | 0.16 (0.05-0.47)    | 0.31 (0.08-0.63)    | 0.318   | 65             | 26         |
| Range                      | 0.01-7.27           | 0.00-5.23           |         |                |            |
| <b>GCDCA</b>               |                     |                     |         |                |            |
| Median (IQR)               | 2.99 (1.32-6.33)    | 1.35 (0.37-3.32)    | 0.007   | 65             | 26         |
| Range                      | 0.18-119.44         | 0.10-17.57          |         |                |            |
| <b>TCDCA</b>               |                     |                     |         |                |            |
| Median (IQR)               | 0.56 (0.16-2.77)    | 0.12 (0.04-0.69)    | 0.008   | 65             | 26         |
| Range                      | 0.02-42.03          | 0.00-15.94          |         |                |            |

|                            | No IBD PSC        | CD PSC           | p-value | No IBD PSC (n) | CD PSC (n) |
|----------------------------|-------------------|------------------|---------|----------------|------------|
| <b>DCA (total)</b>         |                   |                  |         |                |            |
| Median (IQR)               | 1.43 (0.76-2.23)  | 0.81 (0.15-2.20) | 0.063   | 65             | 26         |
| Range                      | 0.00-24.36        | 0.00-11.70       |         |                |            |
| <b>DCA (unconjugated)</b>  |                   |                  |         |                |            |
| Median (IQR)               | 0.29 (0.09-0.65)  | 0.37 (0.03-0.66) | 0.598   | 65             | 26         |
| Range                      | 0.00-3.63         | 0.00-3.67        |         |                |            |
| <b>GDCA</b>                |                   |                  |         |                |            |
| Median (IQR)               | 0.64 (0.35-1.07)  | 0.17 (0.05-0.85) | 0.009   | 65             | 26         |
| Range                      | 0.00-15.49        | 0.00-7.51        |         |                |            |
| <b>TDCA</b>                |                   |                  |         |                |            |
| Median (IQR)               | 0.15 (0.05-0.31)  | 0.02 (0.00-0.25) | 0.014   | 65             | 26         |
| Range                      | 0.00-8.55         | 0.00-3.41        |         |                |            |
| <b>LCA (total)</b>         |                   |                  |         |                |            |
| Median (IQR)               | 0.10 (0.06-0.21)  | 0.03 (0.01-0.09) | 0.001   | 65             | 26         |
| Range                      | 0.00-2.85         | 0.00-1.44        |         |                |            |
| <b>LCA (unconjugated)</b>  |                   |                  |         |                |            |
| Median (IQR)               | 0.03 (0.01-0.07)  | 0.01 (0.00-0.02) | 0.001   | 65             | 26         |
| Range                      | 0.00-0.29         | 0.00-0.41        |         |                |            |
| <b>GLCA</b>                |                   |                  |         |                |            |
| Median (IQR)               | 0.05 (0.02-0.13)  | 0.01 (0.01-0.06) | 0.005   | 65             | 26         |
| Range                      | 0.00-2.14         | 0.00-0.71        |         |                |            |
| <b>TLCA</b>                |                   |                  |         |                |            |
| Median (IQR)               | 0.01 (0.00-0.03)  | 0.00 (0.00-0.01) | 0.017   | 65             | 26         |
| Range                      | 0.00-0.42         | 0.00-0.56        |         |                |            |
| <b>HDCA (total)</b>        |                   |                  |         |                |            |
| Median (IQR)               | 0.02 (0.00-0.05)  | 0.01 (0.00-0.05) | 0.701   | 65             | 26         |
| Range                      | 0.00-0.17         | 0.00-0.41        |         |                |            |
| <b>HDCA (unconjugated)</b> |                   |                  |         |                |            |
| Median (IQR)               | 0.02 (0.00-0.04)  | 0.01 (0.00-0.03) | 0.719   | 65             | 26         |
| Range                      | 0.00-0.13         | 0.00-0.24        |         |                |            |
| <b>GHDCA</b>               |                   |                  |         |                |            |
| Median (IQR)               | 0.00 (0.00-0.00)  | 0.00 (0.00-0.01) | 0.311   | 65             | 26         |
| Range                      | 0.00-0.06         | 0.00-0.17        |         |                |            |
| <b>THDCA</b>               |                   |                  |         |                |            |
| Median (IQR)               | 0.00 (0.00-0.00)  | 0.00 (0.00-0.00) | 0.291   | 65             | 26         |
| Range                      | 0.00-0.07         | 0.00-0.01        |         |                |            |
| <b>UDCA (total)</b>        |                   |                  |         |                |            |
| Median (IQR)               | 3.33 (0.29-18.37) | 0.49 (0.12-1.15) | 0.005   | 65             | 26         |
| Range                      | 0.02-537.71       | 0.00-60.88       |         |                |            |

|                               | No IBD PSC        | CD PSC            | p-value | No IBD PSC (n) | CD PSC (n) |
|-------------------------------|-------------------|-------------------|---------|----------------|------------|
| <b>UDCA (unconjugated)</b>    |                   |                   |         |                |            |
| Median (IQR)                  | 0.12 (0.02-2.29)  | 0.06 (0.01-0.40)  | 0.135   | 65             | 26         |
| Range                         | 0.00-52.33        | 0.00-6.51         |         |                |            |
| <b>GUDCA</b>                  |                   |                   |         |                |            |
| Median (IQR)                  | 1.73 (0.24-15.78) | 0.24 (0.06-0.73)  | 0.003   | 65             | 26         |
| Range                         | 0.01-472.47)      | 0.00-54.41        |         |                |            |
| <b>TUDCA</b>                  |                   |                   |         |                |            |
| Median (IQR)                  | 0.14 (0.03-0.52)  | 0.02 (0.00-0.05)  | <0.001  | 65             | 26         |
| Range                         | 0.00-35.47        | 0.00-4.77         |         |                |            |
| <b>Total BA (conj. frac.)</b> |                   |                   |         |                |            |
| Median (IQR)                  | 0.92 (0.74-0.98)  | 0.75 (0.47-0.91)  | 0.014   | 65             | 26         |
| Range                         | 0.20-1.00         | 0.28-1.00         |         |                |            |
| <b>CA (conj. frac.)</b>       |                   |                   |         |                |            |
| Median (IQR)                  | 0.97 (0.83-1.00)  | 0.85 (0.55-0.96)  | 0.006   | 65             | 26         |
| Range                         | 0.09-1.00         | 0.25-1.00         |         |                |            |
| <b>CDCA (conj. frac.)</b>     |                   |                   |         |                |            |
| Median (IQR)                  | 0.96 (0.79-0.99)  | 0.87 (0.59-0.93)  | 0.015   | 65             | 26         |
| Range                         | 0.29-1.00         | 0.24-1.00         |         |                |            |
| <b>DCA (conj. frac.)</b>      |                   |                   |         |                |            |
| Median (IQR)                  | 0.78 (0.52-0.93)  | 0.58 (0.23-0.80)  | 0.042   | 63             | 24         |
| Range                         | 0.18-1.00         | 0.00-1.00         |         |                |            |
| <b>LCA (conj. frac.)</b>      |                   |                   |         |                |            |
| Median (IQR)                  | 0.71 (0.54-0.80)  | 0.75 (0.50-0.89)  | 0.386   | 62             | 21         |
| Range                         | 0.00-1.00         | 0.33-1.00         |         |                |            |
| <b>HDCA (conj. frac.)</b>     |                   |                   |         |                |            |
| Median (IQR)                  | 0.00 (0.00-0.41)  | 0.00 (0.00-0.41)  | 0.737   | 48             | 17         |
| Range                         | 0.00-1.00         | 0.00-0.67         |         |                |            |
| <b>UDCA (conj. frac.)</b>     |                   |                   |         |                |            |
| Median (IQR)                  | 0.90 (0.75-0.97)  | 0.81 (0.60-0.92)  | 0.032   | 65             | 24         |
| Range                         | 0.28-1.00         | 0.27-1.00         |         |                |            |
| <b>Total BA (G:T ratio)</b>   |                   |                   |         |                |            |
| Median (IQR)                  | 8.09 (2.80-18.65) | 8.19 (4.70-20.57) | 0.818   | 65             | 25         |
| Range                         | 0.62-69.38        | 0.46-85.82        |         |                |            |
| <b>CA (G:T ratio)</b>         |                   |                   |         |                |            |
| Median (IQR)                  | 5.12 (2.33-9.54)  | 6.29 (3.07-10.25) | 0.453   | 64             | 23         |
| Range                         | 0.50-27.00        | 0.57-22.80        |         |                |            |
| <b>CDCA (G:T ratio)</b>       |                   |                   |         |                |            |
| Median (IQR)                  | 5.43 (2.37-9.74)  | 7.85 (3.81-13.20) | 0.126   | 65             | 25         |
| Range                         | 0.67-35.50        | 0.36-67.00        |         |                |            |

|                             | No IBD PSC         | CD PSC              | p-value | No IBD PSC (n) | CD PSC (n) |
|-----------------------------|--------------------|---------------------|---------|----------------|------------|
| <b>DCA (G:T ratio)</b>      |                    |                     |         |                |            |
| Median (IQR)                | 5.09 (2.17-8.60)   | 6.86 (5.09-8.60)    | 0.456   | 61             | 19         |
| Range                       | 0.50-45.00         | 0.22-23.50          |         |                |            |
| <b>LCA (G:T ratio)</b>      |                    |                     |         |                |            |
| Median (IQR)                | 3.00 (1.50-7.00)   | 4.25 (0.79-8.21)    | 0.733   | 37             | 8          |
| Range                       | 0.50-36.00         | 0.20-13.00          |         |                |            |
| <b>HDCA (G:T ratio)</b>     |                    |                     |         |                |            |
| Median (IQR)                | 0.71 (0.71-0.71)   | 3.00 (3.00-3.00)    | 0.317   | 1              | 1          |
| Range                       | 0.71-0.71          | 3.00-3.00           |         |                |            |
| <b>UDCA (G:T ratio)</b>     |                    |                     |         |                |            |
| Median (IQR)                | 13.81 (6.47-31.96) | 21.00 (11.41-51.25) | 0.310   | 59             | 17         |
| Range                       | 0.14-101.14        | 0.42-145.00         |         |                |            |
| <b>CA (frac. BA pool)</b>   |                    |                     |         |                |            |
| Median (IQR)                | 0.12 (0.05-0.28)   | 0.17 (0.12-0.27)    | 0.404   | 65             | 26         |
| Range                       | 0.01-0.79          | 0.01-0.56           |         |                |            |
| <b>CDCA (frac. BA pool)</b> |                    |                     |         |                |            |
| Median (IQR)                | 0.23 (0.13-0.38)   | 0.39 (0.25-0.56)    | 0.004   | 65             | 26         |
| Range                       | 0.04-0.79          | 0.08-0.85           |         |                |            |
| <b>DCA (frac. BA pool)</b>  |                    |                     |         |                |            |
| Median (IQR)                | 0.08 (0.03-0.19)   | 0.12 (0.04-0.22)    | 0.404   | 65             | 26         |
| Range                       | 0.00-0.64          | 0.00-0.61           |         |                |            |
| <b>LCA (frac. BA pool)</b>  |                    |                     |         |                |            |
| Median (IQR)                | 0.01 (0.00-0.01)   | 0.01 (0.00-0.01)    | 0.626   | 65             | 26         |
| Range                       | 0.00-0.04          | 0.00-0.12           |         |                |            |
| <b>HDCA (frac. BA pool)</b> |                    |                     |         |                |            |
| Median (IQR)                | 0.00 (0.00-0.00)   | 0.00 (0.00-0.01)    | 0.463   | 65             | 26         |
| Range                       | 0.00-0.03          | 0.00-0.05           |         |                |            |
| <b>UDCA (frac. BA pool)</b> |                    |                     |         |                |            |
| Median (IQR)                | 0.43 (0.02-0.70)   | 0.05 (0.04-0.20)    | 0.150   | 65             | 26         |
| Range                       | 0.00-0.89          | 0.00-0.83           |         |                |            |
| <b>CA:CDCA ratio</b>        |                    |                     |         |                |            |
| Median (IQR)                | 0.51 (0.30-0.91)   | 0.38 (0.26-0.71)    | 0.366   | 65             | 26         |
| Range                       | 0.06-5.17          | 0.15-1.45           |         |                |            |
| <b>CA:DCA ratio</b>         |                    |                     |         |                |            |
| Median (IQR)                | 1.18 (0.44-5.94)   | 1.03 (0.40-5.40)    | 0.812   | 63             | 24         |
| Range                       | 0.12-698.25        | 0.09-182.50         |         |                |            |
| <b>CDCA:LCA+HDCA+UDCA</b>   |                    |                     |         |                |            |
| Median (IQR)                | 0.48 (0.19-11.13)  | 4.27 (0.87-11.00)   | 0.189   | 65             | 24         |
| Range                       | 0.05-414.18        | 0.09-50.65          |         |                |            |

**Supplementary Table 10.** Bile acids in No IBD and Indeterminate IBD PSC patients.

|                            | No IBD PSC          | Ind IBD PSC         | p-value | No IBD PSC (n) | Ind IBD PSC (n) |
|----------------------------|---------------------|---------------------|---------|----------------|-----------------|
| <b>Age in years</b>        |                     |                     |         |                |                 |
| Median (IQR)               | 55.82 (43.32-61.82) | 47.03 (29.80-59.11) | 0.187   | 65             | 25              |
| Range                      | 14.25-79.68         | 18.90-78.53         |         |                |                 |
| <b>Sex (% Male)</b>        | 49.2                | 52.0                | 0.814   | 65             | 25              |
| <b>Tot BA / UDCA Group</b> |                     |                     |         |                |                 |
| <b>NN - # (%)</b>          | 19 (29.2)           | 11 (44.0)           | 0.465   | 65             | 25              |
| <b>NY - # (%)</b>          | 10 (15.4)           | 4 (16.0)            |         |                |                 |
| <b>HN - # (%)</b>          | 13 (20.0)           | 5 (20.0)            |         |                |                 |
| <b>HY - # (%)</b>          | 23 (35.4)           | 5 (20.0)            |         |                |                 |
| <b>Total BA</b>            |                     |                     |         |                |                 |
| Median (IQR)               | 23.57 (7.71-45.45)  | 12.06 (6.73-38.40)  | 0.184   | 65             | 25              |
| Range                      | 0.88-646.47         | 0.96-53.68          |         |                |                 |
| <b>CA (total)</b>          |                     |                     |         |                |                 |
| Median (IQR)               | 1.84 (0.86-8.72)    | 1.85 (0.60-7.10)    | 0.564   | 65             | 25              |
| Range                      | 0.13-68.19          | 0.16-25.90          |         |                |                 |
| <b>CA (unconjugated)</b>   |                     |                     |         |                |                 |
| Median (IQR)               | 0.05 (0.03-0.12)    | 0.04 (0.03-0.14)    | 0.910   | 65             | 25              |
| Range                      | 0.00-4.02           | 0.01-2.65           |         |                |                 |
| <b>GCA</b>                 |                     |                     |         |                |                 |
| Median (IQR)               | 1.11 (0.45-5.13)    | 1.26 (0.33-4.17)    | 0.525   | 65             | 25              |
| Range                      | 0.06-53.99          | 0.07-12.90          |         |                |                 |
| <b>TCA</b>                 |                     |                     |         |                |                 |
| Median (IQR)               | 0.30 (0.07-2.09)    | 0.15 (0.03-2.10)    | 0.452   | 65             | 25              |
| Range                      | 0.00-30.29          | 0.01-12.74          |         |                |                 |
| <b>CDCA (total)</b>        |                     |                     |         |                |                 |
| Median (IQR)               | 3.85 (2.14-9.80)    | 4.68 (1.48-8.18)    | 0.675   | 65             | 25              |
| Range                      | 0.30-141.73         | 0.70-24.40          |         |                |                 |
| <b>CDCA (unconjugated)</b> |                     |                     |         |                |                 |
| Median (IQR)               | 0.16 (0.05-0.47)    | 0.14 (0.04-0.56)    | 0.708   | 65             | 25              |
| Range                      | 0.01-7.27           | 0.01-3.68           |         |                |                 |
| <b>GCDCA</b>               |                     |                     |         |                |                 |
| Median (IQR)               | 2.99 (1.32-6.33)    | 3.14 (1.00-5.53)    | 0.656   | 65             | 25              |
| Range                      | 0.18-119.44         | 0.36-16.22          |         |                |                 |
| <b>TCDCA</b>               |                     |                     |         |                |                 |
| Median (IQR)               | 0.56 (0.16-2.77)    | 0.42 (0.13-2.06)    | 0.441   | 65             | 25              |
| Range                      | 0.02-42.03          | 0.03-8.40           |         |                |                 |

|                            | No IBD PSC        | Ind IBD PSC      | p-value | No IBD PSC (n) | Ind IBD PSC (n) |
|----------------------------|-------------------|------------------|---------|----------------|-----------------|
| <b>DCA (total)</b>         |                   |                  |         |                |                 |
| Median (IQR)               | 1.43 (0.76-2.23)  | 0.61 (0.24-2.34) | 0.073   | 65             | 25              |
| Range                      | 0.00-24.36        | 0.00-6.13        |         |                |                 |
| <b>DCA (unconjugated)</b>  |                   |                  |         |                |                 |
| Median (IQR)               | 0.29 (0.09-0.65)  | 0.12 (0.02-0.39) | 0.054   | 65             | 25              |
| Range                      | 0.00-3.63         | 0.00-3.06        |         |                |                 |
| <b>GDCA</b>                |                   |                  |         |                |                 |
| Median (IQR)               | 0.64 (0.35-1.07)  | 0.33 (0.08-1.27) | 0.091   | 65             | 25              |
| Range                      | 0.00-15.49        | 0.00 – 4.71      |         |                |                 |
| <b>TDCA</b>                |                   |                  |         |                |                 |
| Median (IQR)               | 0.15 (0.05-0.31)  | 0.08 (0.01-0.32) | 0.239   | 65             | 25              |
| Range                      | 0.00-8.55         | 0.00-1.35        |         |                |                 |
| <b>LCA (total)</b>         |                   |                  |         |                |                 |
| Median (IQR)               | 0.10 (0.06-0.21)  | 0.04 (0.01-0.11) | 0.005   | 65             | 25              |
| Range                      | 0.00-2.85         | 0.00-1.13        |         |                |                 |
| <b>LCA (unconjugated)</b>  |                   |                  |         |                |                 |
| Median (IQR)               | 0.03 (0.01-0.07)  | 0.01 (0.00-0.03) | 0.002   | 65             | 25              |
| Range                      | 0.00-0.29         | 0.00-0.96        |         |                |                 |
| <b>GLCA</b>                |                   |                  |         |                |                 |
| Median (IQR)               | 0.05 (0.02-0.13)  | 0.01 (0.00-0.05) | 0.008   | 65             | 25              |
| Range                      | 0.00-2.14         | 0.00-0.30        |         |                |                 |
| <b>TLCA</b>                |                   |                  |         |                |                 |
| Median (IQR)               | 0.01 (0.00-0.03)  | 0.00 (0.00-0.03) | 0.237   | 65             | 25              |
| Range                      | 0.00-0.42         | 0.00-0.11        |         |                |                 |
| <b>HDCA (total)</b>        |                   |                  |         |                |                 |
| Median (IQR)               | 0.02 (0.00-0.05)  | 0.01 (0.00-0.04) | 0.224   | 65             | 25              |
| Range                      | 0.00-0.17         | 0.00-0.15        |         |                |                 |
| <b>HDCA (unconjugated)</b> |                   |                  |         |                |                 |
| Median (IQR)               | 0.02 (0.00-0.04)  | 0.01 (0.00-0.03) | 0.178   | 65             | 25              |
| Range                      | 0.00-0.13         | 0.00-0.15        |         |                |                 |
| <b>GHDCA</b>               |                   |                  |         |                |                 |
| Median (IQR)               | 0.00 (0.00-0.00)  | 0.00 (0.00-0.00) | 0.850   | 65             | 25              |
| Range                      | 0.00-0.06         | 0.00-0.06        |         |                |                 |
| <b>THDCA</b>               |                   |                  |         |                |                 |
| Median (IQR)               | 0.00 (0.00-0.00)  | 0.00 (0.00-0.00) | 0.723   | 65             | 25              |
| Range                      | 0.00-0.07         | 0.00-0.02        |         |                |                 |
| <b>UDCA (total)</b>        |                   |                  |         |                |                 |
| Median (IQR)               | 3.33 (0.29-18.37) | 0.67 (0.21-7.33) | 0.254   | 65             | 25              |
| Range                      | 0.02-537.71       | 0.01-44.31       |         |                |                 |

|                               | No IBD PSC        | Ind IBD PSC       | p-value | No IBD PSC (n) | Ind IBD PSC (n) |
|-------------------------------|-------------------|-------------------|---------|----------------|-----------------|
| <b>UDCA (unconjugated)</b>    |                   |                   |         |                |                 |
| Median (IQR)                  | 0.12 (0.02-2.29)  | 0.06 (0.01-0.76)  | 0.238   | 65             | 25              |
| Range                         | 0.00-52.33        | 0.00-5.65         |         |                |                 |
| <b>GUDCA</b>                  |                   |                   |         |                |                 |
| Median (IQR)                  | 1.73 (0.24-15.78) | 0.49 (0.20-4.89)  | 0.266   | 65             | 25              |
| Range                         | 0.01-472.47)      | 0.01-39.65        |         |                |                 |
| <b>TUDCA</b>                  |                   |                   |         |                |                 |
| Median (IQR)                  | 0.14 (0.03-0.52)  | 0.07 (0.02-0.17)  | 0.161   | 65             | 25              |
| Range                         | 0.00-35.47        | 0.00-2.63         |         |                |                 |
| <b>Total BA (conj. frac.)</b> |                   |                   |         |                |                 |
| Median (IQR)                  | 0.92 (0.74-0.98)  | 0.94 (0.78-0.97)  | 0.811   | 65             | 25              |
| Range                         | 0.20-1.00         | 0.21-1.00         |         |                |                 |
| <b>CA (conj. frac.)</b>       |                   |                   |         |                |                 |
| Median (IQR)                  | 0.97 (0.83-1.00)  | 0.95 (0.88-0.99)  | 0.488   | 65             | 25              |
| Range                         | 0.09-1.00         | 0.15-1.00         |         |                |                 |
| <b>CDCA (conj. frac.)</b>     |                   |                   |         |                |                 |
| Median (IQR)                  | 0.96 (0.79-0.99)  | 0.97 (0.84-0.99)  | 0.853   | 65             | 25              |
| Range                         | 0.29-1.00         | 0.24-1.00         |         |                |                 |
| <b>DCA (conj. frac.)</b>      |                   |                   |         |                |                 |
| Median (IQR)                  | 0.78 (0.52-0.93)  | 0.83 (0.59-0.94)  | 0.565   | 63             | 23              |
| Range                         | 0.18-1.00         | 0.20-1.00         |         |                |                 |
| <b>LCA (conj. frac.)</b>      |                   |                   |         |                |                 |
| Median (IQR)                  | 0.71 (0.54-0.80)  | 0.75 (0.58-0.96)  | 0.151   | 62             | 19              |
| Range                         | 0.00-1.00         | 0.15-1.00         |         |                |                 |
| <b>HDCA (conj. frac.)</b>     |                   |                   |         |                |                 |
| Median (IQR)                  | 0.00 (0.00-0.41)  | 0.00 (0.00-0.53)  | 0.558   | 48             | 15              |
| Range                         | 0.00-1.00         | 0.00-1.00         |         |                |                 |
| <b>UDCA (conj. frac.)</b>     |                   |                   |         |                |                 |
| Median (IQR)                  | 0.90 (0.75-0.97)  | 0.92 (0.78-0.98)  | 0.766   | 65             | 25              |
| Range                         | 0.28-1.00         | 0.44-1.00         |         |                |                 |
| <b>Total BA (G:T ratio)</b>   |                   |                   |         |                |                 |
| Median (IQR)                  | 8.09 (2.80-18.65) | 8.47 (2.41-22.54) | 0.989   | 65             | 25              |
| Range                         | 0.62-69.38        | 0.62-93.11        |         |                |                 |
| <b>CA (G:T ratio)</b>         |                   |                   |         |                |                 |
| Median (IQR)                  | 5.12 (2.33-9.54)  | 5.19 (2.87-9.27)  | 0.671   | 64             | 25              |
| Range                         | 0.50-27.00        | 0.66-70.33        |         |                |                 |
| <b>CDCA (G:T ratio)</b>       |                   |                   |         |                |                 |
| Median (IQR)                  | 5.43 (2.37-9.74)  | 4.54 (2.33-12.08) | 0.715   | 65             | 25              |
| Range                         | 0.67-35.50        | 0.56-92.17        |         |                |                 |

|                             | No IBD PSC         | Ind IBD PSC        | p-value | No IBD PSC (n) | Ind IBD PSC (n) |
|-----------------------------|--------------------|--------------------|---------|----------------|-----------------|
| <b>DCA (G:T ratio)</b>      |                    |                    |         |                |                 |
| Median (IQR)                | 5.09 (2.17-8.60)   | 4.05 (2.00-7.74)   | 0.462   | 61             | 18              |
| Range                       | 0.50-45.00         | 0.59-14.00         |         |                |                 |
| <b>LCA (G:T ratio)</b>      |                    |                    |         |                |                 |
| Median (IQR)                | 3.00 (1.50-7.00)   | 1.45 (1.00-5.00)   | 0.131   | 37             | 9               |
| Range                       | 0.50-36.00         | 0.33-8.00          |         |                |                 |
| <b>HDCA (G:T ratio)</b>     |                    |                    |         |                |                 |
| Median (IQR)                | 0.71 (0.71-0.71)   | 1.50 (1.50-1.50)   | 0.317   | 1              | 1               |
| Range                       | 0.71-0.71          | 1.50-1.50          |         |                |                 |
| <b>UDCA (G:T ratio)</b>     |                    |                    |         |                |                 |
| Median (IQR)                | 13.81 (6.47-31.96) | 15.37 (4.33-29.00) | 0.840   | 59             | 21              |
| Range                       | 0.14-101.14        | 2.41-87.17         |         |                |                 |
| <b>CA (frac. BA pool)</b>   |                    |                    |         |                |                 |
| Median (IQR)                | 0.12 (0.05-0.28)   | 0.23 (0.10-0.33)   | 0.240   | 65             | 25              |
| Range                       | 0.01-0.79          | 0.02-0.67          |         |                |                 |
| <b>CDCA (frac. BA pool)</b> |                    |                    |         |                |                 |
| Median (IQR)                | 0.23 (0.13-0.38)   | 0.43 (0.18-0.57)   | 0.023   | 65             | 25              |
| Range                       | 0.04-0.79          | 0.08-0.74          |         |                |                 |
| <b>DCA (frac. BA pool)</b>  |                    |                    |         |                |                 |
| Median (IQR)                | 0.08 (0.03-0.19)   | 0.07 (0.01-0.12)   | 0.240   | 65             | 25              |
| Range                       | 0.00-0.64          | 0.00-0.55          |         |                |                 |
| <b>LCA (frac. BA pool)</b>  |                    |                    |         |                |                 |
| Median (IQR)                | 0.01 (0.00-0.01)   | 0.00 (0.00-0.01)   | 0.010   | 65             | 25              |
| Range                       | 0.00-0.04          | 0.00-0.04          |         |                |                 |
| <b>HDCA (frac. BA pool)</b> |                    |                    |         |                |                 |
| Median (IQR)                | 0.00 (0.00-0.00)   | 0.00 (0.00-0.00)   | 0.317   | 65             | 25              |
| Range                       | 0.00-0.03          | 0.00-0.01          |         |                |                 |
| <b>UDCA (frac. BA pool)</b> |                    |                    |         |                |                 |
| Median (IQR)                | 0.43 (0.02-0.70)   | 0.06 (0.02-0.59)   | 0.479   | 65             | 25              |
| Range                       | 0.00-0.89          | 0.01-0.89          |         |                |                 |
| <b>CA:CDCA ratio</b>        |                    |                    |         |                |                 |
| Median (IQR)                | 0.51 (0.30-0.91)   | 0.53 (0.34-0.72)   | 0.960   | 65             | 25              |
| Range                       | 0.06-5.17          | 0.11-2.14          |         |                |                 |
| <b>CA:DCA ratio</b>         |                    |                    |         |                |                 |
| Median (IQR)                | 1.18 (0.44-5.94)   | 2.71 (0.89-16.38)  | 0.139   | 63             | 23              |
| Range                       | 0.12-698.25        | 0.18-1295.00       |         |                |                 |
| <b>CDCA:LCA+HDCA+UDCA</b>   |                    |                    |         |                |                 |
| Median (IQR)                | 0.48 (0.19-11.13)  | 7.78 (0.27-18.80)  | 0.075   | 65             | 25              |
| Range                       | 0.05-414.18        | 0.09-75.00         |         |                |                 |



**Supplementary Table 11.** Bile acids in cirrhotic and non-cirrhotic PSC patients.

|                            | <b>Non-cirrhotic</b> | <b>Cirrhotic</b>     | <b>p-value</b> | <b>NC (n)</b> | <b>Cir (n)</b> |
|----------------------------|----------------------|----------------------|----------------|---------------|----------------|
| <b>Age in years</b>        |                      |                      |                |               |                |
| Median (IQR)               | 47.99 (32.95-59.36)  | 55.37 (33.51-61.41)  | 0.143          | 340           | 60             |
| Range                      | 10.13-80.48          | 17.27-79.68          |                |               |                |
| <b>Sex (% Male)</b>        | 58.5                 | 53.3                 | 0.453          | 340           | 60             |
| <b>Total BA</b>            |                      |                      |                |               |                |
| Median (IQR)               | 13.50 (5.38-32.27)   | 48.84 (22.67-119.16) | <0.001         | 340           | 60             |
| Range                      | 0.54-291.62          | 1.86-646.47          |                |               |                |
| <b>CA (total)</b>          |                      |                      |                |               |                |
| Median (IQR)               | 1.80 (0.64-6.38)     | 13.34 (3.04-32.12)   | <0.001         | 340           | 60             |
| Range                      | 0.04-224.36          | 0.46-192.53          |                |               |                |
| <b>CA (unconjugated)</b>   |                      |                      |                |               |                |
| Median (IQR)               | 0.06 (0.03-0.20)     | 0.08 (0.03-0.26)     | 0.766          | 340           | 60             |
| Range                      | 0.00-10.65           | 0.01-9.85            |                |               |                |
| <b>GCA</b>                 |                      |                      |                |               |                |
| Median (IQR)               | 1.33 (0.41-4.53)     | 8.07 (1.96-18.62)    | <0.001         | 340           | 60             |
| Range                      | 0.01-165.50          | 0.18-151.29          |                |               |                |
| <b>TCA</b>                 |                      |                      |                |               |                |
| Median (IQR)               | 0.18 (0.05-1.23)     | 4.19 (0.49-11.65)    | <0.001         | 340           | 60             |
| Range                      | 0.00-58.61           | 0.01-41.19           |                |               |                |
| <b>CDCA (total)</b>        |                      |                      |                |               |                |
| Median (IQR)               | 3.53 (1.37-80.3)     | 14.80 (4.69-42.63)   | <0.001         | 340           | 60             |
| Range                      | 0.10-71.89           | 0.73-268.56          |                |               |                |
| <b>CDCA (unconjugated)</b> |                      |                      |                |               |                |
| Median (IQR)               | 0.16 (0.05-0.46)     | 0.11 (0.05-0.46)     | 0.823          | 340           | 60             |
| Range                      | 0.00-14.78           | 0.01-9.35            |                |               |                |
| <b>GCDCA</b>               |                      |                      |                |               |                |
| Median (IQR)               | 2.39 (0.97-5.39)     | 7.88 (2.95-23.59)    | <0.001         | 340           | 60             |
| Range                      | 0.02-47.74           | 0.51-214.48          |                |               |                |
| <b>TCDC</b>                |                      |                      |                |               |                |
| Median (IQR)               | 0.36 (0.11-1.32)     | 5.07 (1.11-11.79)    | <0.001         | 340           | 60             |
| Range                      | 0.00-35.85           | 0.01-52.46           |                |               |                |
| <b>DCA (total)</b>         |                      |                      |                |               |                |
| Median (IQR)               | 0.66 (0.02-1.78)     | 0.55 (0.17-1.57)     | 0.540          | 340           | 60             |
| Range                      | 0.00-24.36           | 0.00-9.94            |                |               |                |
| <b>DCA (unconjugated)</b>  |                      |                      |                |               |                |
| Median (IQR)               | 0.13 (0.01-0.46)     | 0.03 (0.01-0.19)     | 0.032          | 340           | 60             |
| Range                      | 0.00-5.99            | 0.00-3.63            |                |               |                |

|                            | Non-cirrhotic     | Cirrhotic         | p-value | NC (n) | Cir (n) |
|----------------------------|-------------------|-------------------|---------|--------|---------|
| <b>GDCA</b>                |                   |                   |         |        |         |
| Median (IQR)               | 0.27 (0.01-1.03)  | 0.31 (0.08-0.83)  | 0.483   | 340    | 60      |
| Range                      | 0.00-15.49        | 0.00-8.20         |         |        |         |
| <b>TDCA</b>                |                   |                   |         |        |         |
| Median (IQR)               | 0.05 (0.00-0.25)  | 0.17 (0.04-0.32)  | 0.007   | 340    | 60      |
| Range                      | 0.00-8.55         | 0.00-3.44         |         |        |         |
| <b>LCA (total)</b>         |                   |                   |         |        |         |
| Median (IQR)               | 0.04 (0.00-0.13)  | 0.06 (0.02-0.26)  | 0.006   | 340    | 60      |
| Range                      | 0.00-2.18         | 0.00-2.85         |         |        |         |
| <b>LCA (unconjugated)</b>  |                   |                   |         |        |         |
| Median (IQR)               | 0.01 (0.00-0.04)  | 0.01 (0.00-0.07)  | 0.151   | 340    | 60      |
| Range                      | 0.00-0.96         | 0.00-0.70         |         |        |         |
| <b>GLCA</b>                |                   |                   |         |        |         |
| Median (IQR)               | 0.02 (0.00-0.08)  | 0.02 (0.01-0.14)  | 0.070   | 340    | 60      |
| Range                      | 0.00-1.63         | 0.00-2.14         |         |        |         |
| <b>TLCA</b>                |                   |                   |         |        |         |
| Median (IQR)               | 0.00 (0.00-0.02)  | 0.01 (0.00-0.06)  | <0.001  | 340    | 60      |
| Range                      | 0.00-0.56         | 0.00-0.42         |         |        |         |
| <b>HDCA (total)</b>        |                   |                   |         |        |         |
| Median (IQR)               | 0.01 (0.00-0.04)  | 0.01 (0.00-0.03)  | 0.310   | 340    | 60      |
| Range                      | 0.00-0.41         | 0.00-0.73         |         |        |         |
| <b>HDCA (unconjugated)</b> |                   |                   |         |        |         |
| Median (IQR)               | 0.01 (0.00-0.03)  | 0.00 (0.00-0.01)  | 0.125   | 340    | 60      |
| Range                      | 0.00-0.24         | 0.00-0.13         |         |        |         |
| <b>GHDCa</b>               |                   |                   |         |        |         |
| Median (IQR)               | 0.00 (0.00-0.01)  | 0.00 (0.00-0.00)  | 0.204   | 340    | 60      |
| Range                      | 0.00-0.17         | 0.00-0.73         |         |        |         |
| <b>THDCa</b>               |                   |                   |         |        |         |
| Median (IQR)               | 0.00 (0.00-0.00)  | 0.00 (0.00-0.00)  | 0.018   | 340    | 60      |
| Range                      | 0.00-0.07         | 0.00-0.01         |         |        |         |
| <b>UDCA (total)</b>        |                   |                   |         |        |         |
| Median (IQR)               | 2.00 (0.19-14.29) | 1.09 (0.22-33.79) | 0.207   | 340    | 60      |
| Range                      | 0.00-194.12       | 0.00-537.71       |         |        |         |
| <b>UDCA (unconjugated)</b> |                   |                   |         |        |         |
| Median (IQR)               | 0.17 (0.01-2.00)  | 0.14 (0.01-2.33)  | 0.784   | 340    | 60      |
| Range                      | 0.00-26.13        | 0.00-52.33        |         |        |         |
| <b>GUDCA</b>               |                   |                   |         |        |         |
| Median (IQR)               | 1.62 (0.12-12.06) | 0.88 (0.09-30.72) | 0.239   | 340    | 60      |
| Range                      | 0.00-175.83       | 0.00-472.47       |         |        |         |

|                               | Non-cirrhotic     | Cirrhotic        | p-value | NC (n) | Cir (n) |
|-------------------------------|-------------------|------------------|---------|--------|---------|
| <b>TUDCA</b>                  |                   |                  |         |        |         |
| Median (IQR)                  | 0.08 (0.01-0.47)  | 0.17 (0.04-2.63) | <0.001  | 340    | 60      |
| Range                         | 0.00-18.60        | 0.00-51.06       |         |        |         |
| <b>Total BA (conj. frac.)</b> |                   |                  |         |        |         |
| Median (IQR)                  | 0.89 (0.72-0.97)  | 0.98 (0.88-0.99) | <0.001  | 340    | 60      |
| Range                         | 0.13-1.00         | 0.20-1.00        |         |        |         |
| <b>CA (conj. frac.)</b>       |                   |                  |         |        |         |
| Median (IQR)                  | 0.96 (0.82-0.99)  | 0.99 (0.96-1.00) | <0.001  | 340    | 60      |
| Range                         | 0.09-1.00         | 0.09-1.00        |         |        |         |
| <b>CDCA (conj. frac.)</b>     |                   |                  |         |        |         |
| Median (IQR)                  | 0.94 (0.82-0.99)  | 0.99 (0.93-1.00) | <0.001  | 340    | 60      |
| Range                         | 0.09-1.00         | 0.24-1.00        |         |        |         |
| <b>DCA (conj. frac.)</b>      |                   |                  |         |        |         |
| Median (IQR)                  | 0.77 (0.50-0.93)  | 0.95 (0.80-0.99) | <0.001  | 286    | 59      |
| Range                         | 0.00-1.00         | 0.18-1.00        |         |        |         |
| <b>LCA (conj. frac.)</b>      |                   |                  |         |        |         |
| Median (IQR)                  | 0.75 (0.55-0.86)  | 0.79 (0.57-1.00) | 0.081   | 231    | 55      |
| Range                         | 0.00-1.00         | 0.00-1.00        |         |        |         |
| <b>HDCA (conj. frac.)</b>     |                   |                  |         |        |         |
| Median (IQR)                  | 0.20 (0.00-0.52)  | 0.33 (0.00-0.67) | 0.314   | 199    | 32      |
| Range                         | 0.00-1.00         | 0.00-1.00        |         |        |         |
| <b>UDCA (conj. frac.)</b>     |                   |                  |         |        |         |
| Median (IQR)                  | 0.88 (0.74-0.97)  | 0.97 (0.86-0.99) | 0.002   | 333    | 59      |
| Range                         | 0.00-1.00         | 0.46-1.00        |         |        |         |
| <b>Total BA (G:T ratio)</b>   |                   |                  |         |        |         |
| Median (IQR)                  | 9.04 (4.44-18.55) | 3.80 (1.77-9.92) | <0.001  | 339    | 60      |
| Range                         | 0.47-93.11        | 0.37-55.50       |         |        |         |
| <b>CA (G:T ratio)</b>         |                   |                  |         |        |         |
| Median (IQR)                  | 6.00 (3.38-9.67)  | 2.44 (1.42-5.80) | <0.001  | 333    | 60      |
| Range                         | 0.47-70.33        | 0.27-22.96       |         |        |         |
| <b>CDCA (G:T ratio)</b>       |                   |                  |         |        |         |
| Median (IQR)                  | 6.46 (3.27-10.71) | 2.52 (1.74-5.60) | <0.001  | 339    | 60      |
| Range                         | 0.38-92.17        | 0.36-51.00       |         |        |         |
| <b>DCA (G:T ratio)</b>        |                   |                  |         |        |         |
| Median (IQR)                  | 5.47 (2.61-8.75)  | 2.17 (1.29-3.98) | <0.001  | 241    | 51      |
| Range                         | 0.29-45.00        | 0.22-38.50       |         |        |         |
| <b>LCA (G:T ratio)</b>        |                   |                  |         |        |         |
| Median (IQR)                  | 3.82 (2.00-7.00)  | 1.45 (1.00-2.85) | <0.001  | 132    | 37      |
| Range                         | 0.50-36.00        | 0.10-12.00       |         |        |         |

|                               | Non-cirrhotic      | Cirrhotic           | p-value | NC (n) | Cir (n) |
|-------------------------------|--------------------|---------------------|---------|--------|---------|
| <b>HDCA (G:T ratio)</b>       |                    |                     |         |        |         |
| Median (IQR)                  | 1.37 (1.00-2.62)   | 1.00 (1.00-1.00)    | 0.382   | 10     | 2       |
| Range                         | 0.71-11.00         | 1.00-1.00           |         |        |         |
| <b>UDCA (G:T ratio)</b>       |                    |                     |         |        |         |
| Median (IQR)                  | 21.00 (8.88-38.21) | 7.55 (4.25-18.05)   | <0.001  | 276    | 54      |
| Range                         | 0.14-145.00        | 0.33-89.15          |         |        |         |
| <b>CA (frac. BA pool)</b>     |                    |                     |         |        |         |
| Median (IQR)                  | 0.17 (0.08-0.34)   | 0.26 (0.12-0.43)    | 0.008   | 340    | 60      |
| Range                         | 0.00-0.79          | 0.01-0.76           |         |        |         |
| <b>CDCA (frac. BA pool)</b>   |                    |                     |         |        |         |
| Median (IQR)                  | 0.26 (0.14-0.45)   | 0.31 (0.20-0.50)    | 0.136   | 340    | 60      |
| Range                         | 0.04-0.93          | 0.06-0.88           |         |        |         |
| <b>DCA (frac. BA pool)</b>    |                    |                     |         |        |         |
| Median (IQR)                  | 0.05 (0.00-0.14)   | 0.01 (0.00-0.04)    | 0.026   | 340    | 60      |
| Range                         | 0.00-0.64          | 0.00-0.46           |         |        |         |
| <b>LCA (frac. BA pool)</b>    |                    |                     |         |        |         |
| Median (IQR)                  | 0.00 (0.00-0.01)   | 0.00 (0.00-0.01)    | 0.992   | 340    | 60      |
| Range                         | 0.00-0.12          | 0.00-0.06           |         |        |         |
| <b>HDCA (frac. BA pool)</b>   |                    |                     |         |        |         |
| Median (IQR)                  | 0.00 (0.00-0.00)   | 0.00 (0.00-0.00)    | 0.039   | 340    | 60      |
| Range                         | 0.00-0.05          | 0.00-0.02           |         |        |         |
| <b>UDCA (frac. BA pool)</b>   |                    |                     |         |        |         |
| Median (IQR)                  | 0.21 (0.03-0.68)   | 0.08 (0.01-0.60)    | 0.029   | 340    | 60      |
| Range                         | 0.00-0.97          | 0.00-0.88           |         |        |         |
| <b>CA:CDCA ratio</b>          |                    |                     |         |        |         |
| Median (IQR)                  | 0.59 (0.34-1.07)   | 0.66 (0.44-1.45)    | 0.106   | 340    | 60      |
| Range                         | 0.05-5.26          | 0.06-4.43           |         |        |         |
| <b>CA:DCA ratio</b>           |                    |                     |         |        |         |
| Median (IQR)                  | 1.91 (0.59-17.09)  | 19.69 (2.81-162.95) | <0.001  | 286    | 59      |
| Range                         | 0.09-3796.67       | 0.36-2002.00        |         |        |         |
| <b>CDCA:LCA+HDCA+UDCA</b>     |                    |                     |         |        |         |
| Median (IQR)                  | 1.36 (0.21-11.07)  | 5.27 (0.30-36.10)   | 0.017   | 333    | 59      |
| Range                         | 0.04-1310.00       | 0.06-422.00         |         |        |         |
| <b>Bile acid / UDCA group</b> |                    |                     | <0.001  | 319    | 57      |
| NN                            | 127 (39.8%)        | 10 (17.5%)          |         |        |         |
| NY                            | 60 (18.8%)         | 1 (1.8%)            |         |        |         |
| HN                            | 41 (12.9%)         | 22 (38.6%)          |         |        |         |
| HY                            | 91 (28.5%)         | 24 (42.1%)          |         |        |         |

**Supplementary Table 12.** Bile acids in autoimmune hepatitis (AIH) overlap and non-overlap large duct PSC patients.

|                            | non-overlap<br>"Large duct" PSC | AIH overlap         | p-value | No (n) | AIH (n) |
|----------------------------|---------------------------------|---------------------|---------|--------|---------|
| <b>Age in years</b>        |                                 |                     |         |        |         |
| Median (IQR)               | 48.83 (33.42-60.14)             | 45.84 (25.23-64.63) | 0.716   | 362    | 14      |
| Range                      | 10.13-80.48                     | 19.44-67.75         |         |        |         |
| <b>Sex (% Male)</b>        | 57.2                            | 57.1                | 0.998   | 362    | 14      |
| <b>Total BA</b>            |                                 |                     |         |        |         |
| Median (IQR)               | 16.34 (5.89-45.87)              | 25.92 (12.76-55.13) | 0.234   | 362    | 14      |
| Range                      | 0.54-646.47                     | 2.56-184.74         |         |        |         |
| <b>CA (total)</b>          |                                 |                     |         |        |         |
| Median (IQR)               | 2.12 (0.76-10.54)               | 2.26 (1.12-5.25)    | 0.894   | 362    | 14      |
| Range                      | 0.04-224.36                     | 0.18-110.08         |         |        |         |
| <b>CA (unconjugated)</b>   |                                 |                     |         |        |         |
| Median (IQR)               | 0.07 (0.03-0.23)                | 0.04 (0.02-0.11)    | 0.347   | 362    | 14      |
| Range                      | 0.00-10.65                      | 0.01-0.77           |         |        |         |
| <b>GCA</b>                 |                                 |                     |         |        |         |
| Median (IQR)               | 1.70 (0.46-6.41)                | 1.96 (0.69-3.87)    | 0.975   | 362    | 14      |
| Range                      | 0.01-165.50                     | 0.16-51.45          |         |        |         |
| <b>TCA</b>                 |                                 |                     |         |        |         |
| Median (IQR)               | 0.27 (0.07-2.57)                | 0.27 (0.08-1.27)    | 0.911   | 362    | 14      |
| Range                      | 0.00-58.57                      | 0.01-58.61          |         |        |         |
| <b>CDCA (total)</b>        |                                 |                     |         |        |         |
| Median (IQR)               | 4.09 (1.69-10.26)               | 4.50 (3.06-8.57)    | 0.660   | 362    | 14      |
| Range                      | 0.10-268.56                     | 0.73-71.89          |         |        |         |
| <b>CDCA (unconjugated)</b> |                                 |                     |         |        |         |
| Median (IQR)               | 0.15 (0.05-0.46)                | 0.29 (0.14-0.63)    | 0.170   | 362    | 14      |
| Range                      | 0.00-14.78                      | 0.01-1.55           |         |        |         |
| <b>GCDCA</b>               |                                 |                     |         |        |         |
| Median (IQR)               | 2.87 (1.10-7.18)                | 3.59 (1.81-5.57)    | 0.651   | 362    | 14      |
| Range                      | 0.02-214.48                     | 0.40-36.01          |         |        |         |
| <b>TCDC A</b>              |                                 |                     |         |        |         |
| Median (IQR)               | 0.49 (0.13-2.25)                | 0.62 (0.20-2.17)    | 0.678   | 362    | 14      |
| Range                      | 0.00-52.46                      | 0.06-35.85          |         |        |         |
| <b>DCA (total)</b>         |                                 |                     |         |        |         |
| Median (IQR)               | 0.65 (0.03-1.73)                | 1.43 (0.32-2.02)    | 0.279   | 362    | 14      |
| Range                      | 0.00-24.36                      | 0.00-6.45           |         |        |         |
| <b>DCA (unconjugated)</b>  |                                 |                     |         |        |         |
| Median (IQR)               | 0.09 (0.01-0.41)                | 0.38 (0.07-0.54)    | 0.160   | 362    | 14      |
| Range                      | 0.00-5.99                       | 0.00-0.85           |         |        |         |

|                            | <b>Non-overlap</b> | <b>AIH overlap</b> | <b>p-value</b> | <b>No (n)</b> | <b>AIH (n)</b> |
|----------------------------|--------------------|--------------------|----------------|---------------|----------------|
| <b>GDCA</b>                |                    |                    |                |               |                |
| Median (IQR)               | 0.28 (0.02-0.93)   | 0.65 (0.10-1.36)   | 0.386          | 362           | 14             |
| Range                      | 0.00-15.49         | 0.00-4.16          |                |               |                |
| <b>TDCA</b>                |                    |                    |                |               |                |
| Median (IQR)               | 0.06 (0.00-0.29)   | 0.11 (0.01-0.39)   | 0.350          | 362           | 14             |
| Range                      | 0.00-8.55          | 0.00-1.98          |                |               |                |
| <b>LCA (total)</b>         |                    |                    |                |               |                |
| Median (IQR)               | 0.04 (0.00-0.15)   | 0.10 (0.01-0.24)   | 0.379          | 362           | 14             |
| Range                      | 0.00-2.85          | 0.00-1.71          |                |               |                |
| <b>LCA (unconjugated)</b>  |                    |                    |                |               |                |
| Median (IQR)               | 0.01 (0.00-0.04)   | 0.04 (0.00-0.06)   | 0.160          | 362           | 14             |
| Range                      | 0.00-0.96          | 0.00-0.55          |                |               |                |
| <b>GLCA</b>                |                    |                    |                |               |                |
| Median (IQR)               | 0.02 (0.00-0.09)   | 0.03 (0.00-0.13)   | 0.672          | 362           | 14             |
| Range                      | 0.00-2.14          | 0.00-1.03          |                |               |                |
| <b>TLCA</b>                |                    |                    |                |               |                |
| Median (IQR)               | 0.00 (0.00-0.02)   | 0.01 (0.00-0.02)   | 0.440          | 362           | 14             |
| Range                      | 0.00-0.56          | 0.00-0.13          |                |               |                |
| <b>HDCA (total)</b>        |                    |                    |                |               |                |
| Median (IQR)               | 0.01 (0.00-0.04)   | 0.01 (0.00-0.07)   | 0.341          | 362           | 14             |
| Range                      | 0.00-0.73          | 0.00-0.09          |                |               |                |
| <b>HDCA (unconjugated)</b> |                    |                    |                |               |                |
| Median (IQR)               | 0.00 (0.00-0.02)   | 0.01 (0.00-0.03)   | 0.872          | 362           | 14             |
| Range                      | 0.00-0.24          | 0.00-0.09          |                |               |                |
| <b>GHDCA</b>               |                    |                    |                |               |                |
| Median (IQR)               | 0.00 (0.00-0.01)   | 0.01 (0.00-0.01)   | 0.101          | 362           | 14             |
| Range                      | 0.00-0.73          | 0.00-0.05          |                |               |                |
| <b>THDCA</b>               |                    |                    |                |               |                |
| Median (IQR)               | 0.00 (0.00-0.00)   | 0.00 (0.00-0.00)   | 0.894          | 362           | 14             |
| Range                      | 0.00-0.07          | 0.00-0.04          |                |               |                |
| <b>UDCA (total)</b>        |                    |                    |                |               |                |
| Median (IQR)               | 1.80 (0.17-18.69)  | 8.73 (1.47-24.76)  | 0.106          | 362           | 14             |
| Range                      | 0.00-537.71        | 0.03-78.99         |                |               |                |
| <b>UDCA (unconjugated)</b> |                    |                    |                |               |                |
| Median (IQR)               | 0.15 (0.01-2.03)   | 2.79 (0.14-5.47)   | 0.060          | 362           | 14             |
| Range                      | 0.00-52.33         | 0.00-16.90         |                |               |                |
| <b>GUDCA</b>               |                    |                    |                |               |                |
| Median (IQR)               | 1.41 (0.11-13.86)  | 5.80 (1.08-15.36)  | 0.124          | 362           | 14             |
| Range                      | 0.00-472.47        | 0.02-66.92         |                |               |                |

|                               | <b>Non-overlap</b> | <b>AIH overlap</b> | <b>p-value</b> | <b>No (n)</b> | <b>AIH (n)</b> |
|-------------------------------|--------------------|--------------------|----------------|---------------|----------------|
| <b>TUDCA</b>                  |                    |                    |                |               |                |
| Median (IQR)                  | 0.08 (0.01-0.53)   | 0.28 (0.10-0.70)   | 0.114          | 362           | 14             |
| Range                         | 0.00-51.06         | 0.01-8.13          |                |               |                |
| <b>Total BA (conj. frac.)</b> |                    |                    |                |               |                |
| Median (IQR)                  | 0.91 (0.74-0.98)   | 0.84 (0.68-0.93)   | 0.371          | 362           | 14             |
| Range                         | 0.13-1.00          | 0.63-1.00          |                |               |                |
| <b>CA (conj. frac.)</b>       |                    |                    |                |               |                |
| Median (IQR)                  | 0.97 (0.84-0.99)   | 0.98 (0.89-0.99)   | 0.591          | 362           | 14             |
| Range                         | 0.09-1.00          | 0.44-1.00          |                |               |                |
| <b>CDCA (conj. frac.)</b>     |                    |                    |                |               |                |
| Median (IQR)                  | 0.96 (0.83-0.99)   | 0.91 (0.77-0.98)   | 0.449          | 362           | 14             |
| Range                         | 0.12-1.00          | 0.57-1.00          |                |               |                |
| <b>DCA (conj. frac.)</b>      |                    |                    |                |               |                |
| Median (IQR)                  | 0.81 (0.54-0.96)   | 0.71 (0.51-0.81)   | 0.359          | 313           | 13             |
| Range                         | 0.00-1.00          | 0.00-1.00          |                |               |                |
| <b>LCA (conj. frac.)</b>      |                    |                    |                |               |                |
| Median (IQR)                  | 0.75 (0.57-0.88)   | 0.68 (0.33-0.79)   | 0.099          | 258           | 11             |
| Range                         | 0.00-1.00          | 0.00-1.00          |                |               |                |
| <b>HDCA (conj. frac.)</b>     |                    |                    |                |               |                |
| Median (IQR)                  | 0.25 (0.00-0.55)   | 0.59 (0.06-0.97)   | 0.111          | 205           | 10             |
| Range                         | 0.00-1.00          | 0.00-1.00          |                |               |                |
| <b>UDCA (conj. frac.)</b>     |                    |                    |                |               |                |
| Median (IQR)                  | 0.90 (0.75-0.97)   | 0.80 (0.74-0.96)   | 0.394          | 354           | 14             |
| Range                         | 0.00-1.00          | 0.58-1.00          |                |               |                |
| <b>Total BA (G:T ratio)</b>   |                    |                    |                |               |                |
| Median (IQR)                  | 8.26 (3.39-17.30)  | 11.42 (5.03-20.53) | 0.612          | 361           | 14             |
| Range                         | 0.37-93.11         | 0.92-47.57         |                |               |                |
| <b>CA (G:T ratio)</b>         |                    |                    |                |               |                |
| Median (IQR)                  | 5.53 (2.64-9.00)   | 5.82 (2.98-11.86)  | 0.663          | 356           | 14             |
| Range                         | 0.27-70.33         | 0.88-21.30         |                |               |                |
| <b>CDCA (G:T ratio)</b>       |                    |                    |                |               |                |
| Median (IQR)                  | 5.68 (2.77-10.33)  | 5.75 (2.67-9.27)   | 0.684          | 361           | 14             |
| Range                         | 0.36-92.17         | 0.97-16.33         |                |               |                |
| <b>DCA (G:T ratio)</b>        |                    |                    |                |               |                |
| Median (IQR)                  | 4.69 (2.08-8.20)   | 4.82 (3.07-6.57)   | 0.900          | 265           | 11             |
| Range                         | 0.22-44.50         | 0.63-18.38         |                |               |                |
| <b>LCA (G:T ratio)</b>        |                    |                    |                |               |                |
| Median (IQR)                  | 3.00 (1.45-6.00)   | 5.05 (1.66-6.25)   | 0.657          | 153           | 8              |
| Range                         | 0.10-36.00         | 1.00-7.92          |                |               |                |

|                               | <b>Non-overlap</b> | <b>AIH overlap</b> | <b>p-value</b> | <b>No (n)</b> | <b>AIH (n)</b> |
|-------------------------------|--------------------|--------------------|----------------|---------------|----------------|
| <b>HDCA (G:T ratio)</b>       |                    |                    |                |               |                |
| Median (IQR)                  | 1.33 (1.00-2.25)   | 0.75 (0.75-0.75)   | 0.185          | 11            | 1              |
| Range                         | 0.71-11.00         | 0.75-0.75          |                |               |                |
| <b>UDCA (G:T ratio)</b>       |                    |                    |                |               |                |
| Median (IQR)                  | 17.44 (7.00-34.58) | 27.54 (8.80-35.44) | 0.552          | 299           | 14             |
| Range                         | 0.14-145.00        | 1.11-62.84         |                |               |                |
| <b>CA (frac. BA pool)</b>     |                    |                    |                |               |                |
| Median (IQR)                  | 0.19 (0.09-0.37)   | 0.08 (0.04-0.18)   | 0.066          | 362           | 14             |
| Range                         | 0.00-0.79          | 0.03-0.60          |                |               |                |
| <b>CDCA (frac. BA pool)</b>   |                    |                    |                |               |                |
| Median (IQR)                  | 0.27 (0.15-0.45)   | 0.17 (0.12-0.36)   | 0.141          | 362           | 14             |
| Range                         | 0.04-0.88          | 0.06-0.55          |                |               |                |
| <b>DCA (frac. BA pool)</b>    |                    |                    |                |               |                |
| Median (IQR)                  | 0.03 (0.00-0.14)   | 0.06 (0.01-0.10)   | 0.743          | 362           | 14             |
| Range                         | 0.00-0.64          | 0.00-0.23          |                |               |                |
| <b>LCA (frac. BA pool)</b>    |                    |                    |                |               |                |
| Median (IQR)                  | 0.00 (0.00-0.01)   | 0.00 (0.00-0.01)   | 0.538          | 362           | 14             |
| Range                         | 0.00-0.12          | 0.00-0.06          |                |               |                |
| <b>HDCA (frac. BA pool)</b>   |                    |                    |                |               |                |
| Median (IQR)                  | 0.00 (0.00-0.00)   | 0.00 (0.00-0.00)   | 0.385          | 362           | 14             |
| Range                         | 0.00-0.05          | 0.00-0.01          |                |               |                |
| <b>UDCA (frac. BA pool)</b>   |                    |                    |                |               |                |
| Median (IQR)                  | 0.17 (0.02-0.66)   | 0.65 (0.18-0.72)   | 0.096          | 362           | 14             |
| Range                         | 0.00-0.91          | 0.00-0.88          |                |               |                |
| <b>CA:CDCA ratio</b>          |                    |                    |                |               |                |
| Median (IQR)                  | 0.63 (0.35-1.15)   | 0.51 (0.34-0.86)   | 0.374          | 362           | 14             |
| Range                         | 0.05-5.26          | 0.15-1.53          |                |               |                |
| <b>CA:DCA ratio</b>           |                    |                    |                |               |                |
| Median (IQR)                  | 2.72 (0.81-27.51)  | 1.08 (0.76-3.56)   | 0.448          | 313           | 14             |
| Range                         | 0.09-3796.67       | 0.28-1650.00       |                |               |                |
| <b>CDCA:LCA+HDCA+UDCA</b>     |                    |                    |                |               |                |
| Median (IQR)                  | 1.88 (0.22-14.22)  | 0.27 (0.17-3.66)   | 0.159          | 354           | 14             |
| Range                         | 0.04-1310.00       | 0.06-462.67        |                |               |                |
| <b>Bile acid / UDCA group</b> |                    |                    | 0.185          | 342           | 13             |
| NN                            | 128 (37.4%)        | 1 (7.7%)           |                |               |                |
| NY                            | 52 (15.2%)         | 3 (23.1%)          |                |               |                |
| HN                            | 58 (17.0%)         | 3 (23.1%)          |                |               |                |
| HY                            | 104 (30.4%)        | 6 (46.2%)          |                |               |                |



**Supplementary Table 13.** Bile acids in small duct (SD) and large duct (LD) PSC patients.

|                            | large duct PSC      | small duct PSC      | p-value | LD (n) | SD (n) |
|----------------------------|---------------------|---------------------|---------|--------|--------|
| <b>Age in years</b>        |                     |                     |         |        |        |
| Median (IQR)               | 48.83 (33.42-60.14) | 38.20 (29.06-50.11) | 0.013   | 362    | 26     |
| Range                      | 10.13-80.48         | 11.82-68.15         |         |        |        |
| <b>Sex (% Male)</b>        | 57.2                | 65.4                | 0.413   | 362    | 26     |
| <b>Total BA</b>            |                     |                     |         |        |        |
| Median (IQR)               | 16.34 (5.89-45.87)  | 11.36 (5.95-28.85)  | 0.184   | 362    | 26     |
| Range                      | 0.54-646.47         | 0.88-60.71          |         |        |        |
| <b>CA (total)</b>          |                     |                     |         |        |        |
| Median (IQR)               | 2.12 (0.76-10.54)   | 1.18 (0.37-5.82)    | 0.020   | 362    | 26     |
| Range                      | 0.04-224.36         | 0.30-24.40          |         |        |        |
| <b>CA (unconjugated)</b>   |                     |                     |         |        |        |
| Median (IQR)               | 0.07 (0.03-0.23)    | 0.04 (0.02-0.08)    | 0.034   | 362    | 26     |
| Range                      | 0.00-10.65          | 0.01-0.50           |         |        |        |
| <b>GCA</b>                 |                     |                     |         |        |        |
| Median (IQR)               | 1.70 (0.46-6.41)    | 0.92 (0.26-2.66)    | 0.064   | 362    | 26     |
| Range                      | 0.01-165.50         | 0.06-13.69          |         |        |        |
| <b>TCA</b>                 |                     |                     |         |        |        |
| Median (IQR)               | 0.27 (0.07-2.57)    | 0.12 (0.03-0.44)    | 0.040   | 362    | 26     |
| Range                      | 0.00-58.57          | 0.00-4.92           |         |        |        |
| <b>CDCA (total)</b>        |                     |                     |         |        |        |
| Median (IQR)               | 4.09 (1.69-10.26)   | 3.35 (1.19-5.82)    | 0.114   | 362    | 26     |
| Range                      | 0.10-268.56         | 0.30-24.40          |         |        |        |
| <b>CDCA (unconjugated)</b> |                     |                     |         |        |        |
| Median (IQR)               | 0.15 (0.05-0.46)    | 0.13 (0.07-0.38)    | 0.773   | 362    | 26     |
| Range                      | 0.00-14.78          | 0.02-1.67           |         |        |        |
| <b>GCDCA</b>               |                     |                     |         |        |        |
| Median (IQR)               | 2.87 (1.10-7.18)    | 2.06 (0.86-4.46)    | 0.183   | 362    | 26     |
| Range                      | 0.02-214.48         | 0.18-19.54          |         |        |        |
| <b>TCDCA</b>               |                     |                     |         |        |        |
| Median (IQR)               | 0.49 (0.13-2.25)    | 0.33 (0.07-0.94)    | 0.117   | 362    | 26     |
| Range                      | 0.00-52.46          | 0.02-8.04           |         |        |        |
| <b>DCA (total)</b>         |                     |                     |         |        |        |
| Median (IQR)               | 0.65 (0.03-1.73)    | 0.64 (0.01-1.71)    | 0.565   | 362    | 26     |
| Range                      | 0.00-24.36          | 0.00-5.98           |         |        |        |
| <b>DCA (unconjugated)</b>  |                     |                     |         |        |        |
| Median (IQR)               | 0.09 (0.01-0.41)    | 0.30 (0.00-0.44)    | 0.545   | 362    | 26     |
| Range                      | 0.00-5.99           | 0.00-1.23           |         |        |        |

|                            | large duct PSC    | small duct PSC    | p-value | LD (n) | SD (n) |
|----------------------------|-------------------|-------------------|---------|--------|--------|
| <b>GDCA</b>                |                   |                   |         |        |        |
| Median (IQR)               | 0.28 (0.02-0.93)  | 0.23 (0.01-1.02)  | 0.605   | 362    | 26     |
| Range                      | 0.00-15.49        | 0.00-4.76         |         |        |        |
| <b>TDCA</b>                |                   |                   |         |        |        |
| Median (IQR)               | 0.06 (0.00-0.29)  | 0.04 (0.00-0.12)  | 0.160   | 362    | 26     |
| Range                      | 0.00-8.55         | 0.00-0.59         |         |        |        |
| <b>LCA (total)</b>         |                   |                   |         |        |        |
| Median (IQR)               | 0.04 (0.00-0.15)  | 0.04 (0.00-0.13)  | 0.752   | 362    | 26     |
| Range                      | 0.00-2.85         | 0.00-0.60         |         |        |        |
| <b>LCA (unconjugated)</b>  |                   |                   |         |        |        |
| Median (IQR)               | 0.01 (0.00-0.04)  | 0.01 (0.00-0.06)  | 0.666   | 362    | 26     |
| Range                      | 0.00-0.96         | 0.00-0.23         |         |        |        |
| <b>GLCA</b>                |                   |                   |         |        |        |
| Median (IQR)               | 0.02 (0.00-0.09)  | 0.01 (0.00-0.07)  | 0.686   | 362    | 26     |
| Range                      | 0.00-2.14         | 0.00-0.33         |         |        |        |
| <b>TLCA</b>                |                   |                   |         |        |        |
| Median (IQR)               | 0.00 (0.00-0.02)  | 0.00 (0.00-0.01)  | 0.300   | 362    | 26     |
| Range                      | 0.00-0.56         | 0.00-0.15         |         |        |        |
| <b>HDCA (total)</b>        |                   |                   |         |        |        |
| Median (IQR)               | 0.01 (0.00-0.04)  | 0.01 (0.00-0.04)  | 0.668   | 362    | 26     |
| Range                      | 0.00-0.73         | 0.00-0.12         |         |        |        |
| <b>HDCA (unconjugated)</b> |                   |                   |         |        |        |
| Median (IQR)               | 0.00 (0.00-0.02)  | 0.01 (0.00-0.03)  | 0.310   | 362    | 26     |
| Range                      | 0.00-0.24         | 0.00-0.08         |         |        |        |
| <b>GHDCA</b>               |                   |                   |         |        |        |
| Median (IQR)               | 0.00 (0.00-0.01)  | 0.00 (0.00-0.00)  | 0.555   | 362    | 26     |
| Range                      | 0.00-0.73         | 0.00-0.04         |         |        |        |
| <b>THDCA</b>               |                   |                   |         |        |        |
| Median (IQR)               | 0.00 (0.00-0.00)  | 0.00 (0.00-0.00)  | 0.176   | 362    | 26     |
| Range                      | 0.00-0.07         | 0.00-0.00         |         |        |        |
| <b>UDCA (total)</b>        |                   |                   |         |        |        |
| Median (IQR)               | 1.80 (0.17-18.69) | 3.56 (0.23-11.21) | 0.954   | 362    | 26     |
| Range                      | 0.00-537.71       | 0.02-52.22        |         |        |        |
| <b>UDCA (unconjugated)</b> |                   |                   |         |        |        |
| Median (IQR)               | 0.15 (0.01-2.03)  | 0.51 (0.01-1.49)  | 0.792   | 362    | 26     |
| Range                      | 0.00-52.33        | 0.00-5.84         |         |        |        |
| <b>GUDCA</b>               |                   |                   |         |        |        |
| Median (IQR)               | 1.41 (0.11-13.86) | 2.62 (0.19-9.51)  | 0.869   | 362    | 26     |
| Range                      | 0.00-472.47       | 0.01-44.53        |         |        |        |

|                               | large duct PSC    | small duct PSC     | p-value | LD (n) | SD (n) |
|-------------------------------|-------------------|--------------------|---------|--------|--------|
| <b>TUDCA</b>                  |                   |                    |         |        |        |
| Median (IQR)                  | 0.08 (0.01-0.53)  | 0.10 (0.00-0.29)   | 0.498   | 362    | 26     |
| Range                         | 0.00-51.06        | 0.00-2.61          |         |        |        |
| <b>Total BA (conj. frac.)</b> |                   |                    |         |        |        |
| Median (IQR)                  | 0.91 (0.74-0.98)  | 0.87 (0.74-0.93)   | 0.317   | 362    | 26     |
| Range                         | 0.13-1.00         | 0.51-1.00          |         |        |        |
| <b>CA (conj. frac.)</b>       |                   |                    |         |        |        |
| Median (IQR)                  | 0.97 (0.84-0.99)  | 0.95 (0.88-0.99)   | 0.811   | 362    | 26     |
| Range                         | 0.09-1.00         | 0.37-1.00          |         |        |        |
| <b>CDCA (conj. frac.)</b>     |                   |                    |         |        |        |
| Median (IQR)                  | 0.96 (0.83-0.99)  | 0.91 (0.81-0.98)   | 0.164   | 362    | 26     |
| Range                         | 0.12-1.00         | 0.45-1.00          |         |        |        |
| <b>DCA (conj. frac.)</b>      |                   |                    |         |        |        |
| Median (IQR)                  | 0.81 (0.54-0.96)  | 0.63 (0.42-0.83)   | 0.049   | 313    | 20     |
| Range                         | 0.00-1.00         | 0.00-1.00          |         |        |        |
| <b>LCA (conj. frac.)</b>      |                   |                    |         |        |        |
| Median (IQR)                  | 0.75 (0.57-0.88)  | 0.62 (0.47-0.79)   | 0.041   | 258    | 18     |
| Range                         | 0.00-1.00         | 0.25-1.00          |         |        |        |
| <b>HDCA (conj. frac.)</b>     |                   |                    |         |        |        |
| Median (IQR)                  | 0.25 (0.00-0.55)  | 0.00 (0.00-0.31)   | 0.072   | 205    | 18     |
| Range                         | 0.00-1.00         | 0.00-1.00          |         |        |        |
| <b>UDCA (conj. frac.)</b>     |                   |                    |         |        |        |
| Median (IQR)                  | 0.90 (0.75-0.97)  | 0.88 (0.80-0.96)   | 0.864   | 354    | 26     |
| Range                         | 0.00-1.00         | 0.50-1.00          |         |        |        |
| <b>Total BA (G:T ratio)</b>   |                   |                    |         |        |        |
| Median (IQR)                  | 8.26 (3.39-17.30) | 10.64 (5.99-17.69) | 0.133   | 361    | 26     |
| Range                         | 0.37-93.11        | 2.07-69.38         |         |        |        |
| <b>CA (G:T ratio)</b>         |                   |                    |         |        |        |
| Median (IQR)                  | 5.53 (2.64-9.00)  | 6.00 (4.17-10.56)  | 0.105   | 356    | 25     |
| Range                         | 0.27-70.33        | 2.08-14.00         |         |        |        |
| <b>CDCA (G:T ratio)</b>       |                   |                    |         |        |        |
| Median (IQR)                  | 5.68 (2.77-10.33) | 6.79 (4.58-10.42)  | 0.301   | 361    | 26     |
| Range                         | 0.36-92.17        | 2.02-31.00         |         |        |        |
| <b>DCA (G:T ratio)</b>        |                   |                    |         |        |        |
| Median (IQR)                  | 4.69 (2.08-8.20)  | 8.06 (4.13-10.67)  | 0.036   | 265    | 17     |
| Range                         | 0.22-44.50        | 1.83-45.00         |         |        |        |
| <b>LCA (G:T ratio)</b>        |                   |                    |         |        |        |
| Median (IQR)                  | 3.00 (1.45-6.00)  | 3.86 (1.40-7.00)   | 0.583   | 153    | 9      |
| Range                         | 0.10-36.00        | 1.00-14.00         |         |        |        |

|                               | large duct PSC     | small duct PSC      | p-value | LD (n) | SD (n) |
|-------------------------------|--------------------|---------------------|---------|--------|--------|
| <b>HDCA (G:T ratio)</b>       |                    |                     |         |        |        |
| Median (IQR)                  | 1.33 (1.00-2.25)   | NA                  | NA      | 11     | 0      |
| Range                         | 0.71-11.00         | NA                  |         |        |        |
| <b>UDCA (G:T ratio)</b>       |                    |                     |         |        |        |
| Median (IQR)                  | 17.44 (7.00-34.58) | 29.78 (19.47-44.73) | 0.019   | 299    | 19     |
| Range                         | 0.14-145.00        | 5.91-101.14         |         |        |        |
| <b>CA (frac. BA pool)</b>     |                    |                     |         |        |        |
| Median (IQR)                  | 0.19 (0.09-0.37)   | 0.12 (0.06-0.28)    | 0.054   | 362    | 26     |
| Range                         | 0.00-0.79          | 0.02-0.62           |         |        |        |
| <b>CDCA (frac. BA pool)</b>   |                    |                     |         |        |        |
| Median (IQR)                  | 0.27 (0.15-0.45)   | 0.26 (0.14-0.47)    | 0.780   | 362    | 26     |
| Range                         | 0.04-0.88          | 0.05-0.93           |         |        |        |
| <b>DCA (frac. BA pool)</b>    |                    |                     |         |        |        |
| Median (IQR)                  | 0.03 (0.00-0.14)   | 0.08 (0.00-0.13)    | 0.828   | 362    | 26     |
| Range                         | 0.00-0.64          | 0.00-0.39           |         |        |        |
| <b>LCA (frac. BA pool)</b>    |                    |                     |         |        |        |
| Median (IQR)                  | 0.00 (0.00-0.01)   | 0.01 (0.00-0.01)    | 0.421   | 362    | 26     |
| Range                         | 0.00-0.12          | 0.00-0.04           |         |        |        |
| <b>HDCA (frac. BA pool)</b>   |                    |                     |         |        |        |
| Median (IQR)                  | 0.00 (0.00-0.00)   | 0.00 (0.00-0.00)    | 0.232   | 362    | 26     |
| Range                         | 0.00-0.05          | 0.00-0.03           |         |        |        |
| <b>UDCA (frac. BA pool)</b>   |                    |                     |         |        |        |
| Median (IQR)                  | 0.17 (0.02-0.66)   | 0.53 (0.04-0.66)    | 0.417   | 362    | 26     |
| Range                         | 0.00-0.91          | 0.00-0.86           |         |        |        |
| <b>CA:CDCA ratio</b>          |                    |                     |         |        |        |
| Median (IQR)                  | 0.63 (0.35-1.15)   | 0.48 (0.30-0.64)    | 0.044   | 362    | 26     |
| Range                         | 0.05-5.26          | 0.07-2.31           |         |        |        |
| <b>CA:DCA ratio</b>           |                    |                     |         |        |        |
| Median (IQR)                  | 2.72 (0.81-27.51)  | 0.80 (0.38-4.20)    | 0.030   | 313    | 20     |
| Range                         | 0.09-3796.67       | 0.16-520.00         |         |        |        |
| <b>CDCA:LCA+HDCA+UDCA</b>     |                    |                     |         |        |        |
| Median (IQR)                  | 1.88 (0.22-14.22)  | 0.41 (0.22-9.28)    | 0.504   | 354    | 26     |
| Range                         | 0.04-1310.00       | 0.07-375.67         |         |        |        |
| <b>Bile acid / UDCA group</b> |                    |                     | 0.245   | 342    | 23     |
| NN                            | 128 (37.4%)        | 8 (34.8%)           |         |        |        |
| NY                            | 52 (15.2%)         | 7 (30.4%)           |         |        |        |
| HN                            | 58 (17.0%)         | 2 (8.7%)            |         |        |        |
| HY                            | 104 (30.4%)        | 6 (26.1%)           |         |        |        |

**Supplementary Table 14.** Univariate time to event (hepatic decompensation) analyses.

| <b>Parameter</b>                      | <b>HR (95% CI)</b>  | <b>p-value</b> | <b>c-stat</b> | <b>n</b> |
|---------------------------------------|---------------------|----------------|---------------|----------|
| <b>Age</b> (per 10 years)             | 1.50 (1.24-1.83)    | <0.001         | 0.69          | 400      |
| <b>Male sex</b>                       | 0.75 (0.43-1.30)    | 0.302          | 0.52          | 400      |
| <b>IBD type</b> (vs. No IBD)          |                     |                |               | 347      |
| Indeterminate IBD                     | 0.75 (0.21-2.70)    | 0.66           | 0.53          |          |
| Crohn's Disease (CD)                  | 0.25 (0.03-1.96)    | 0.19           | 0.53          |          |
| Ulcerative colitis (UC)               | 0.78 (0.39-1.57)    | 0.49           | 0.53          |          |
| <b>PSC subtypes</b> (vs. non-subtype) |                     |                |               | 400      |
| Cirrhotic                             | 5.29 (3.02-9.25)    | <0.001         | 0.66          |          |
| Small duct disease                    | 0.24 (0.03-1.75)    | 0.16           | 0.53          |          |
| AIH overlap                           | 2.94 (1.17-7.40)    | 0.02           | 0.53          |          |
| <b>Total bile acids</b>               |                     |                |               |          |
| Total                                 | 1.15 (1.11-1.18)    | <0.001         | 0.80          | 400      |
| Total (excluding UDCA)                | 1.15 (1.11-1.19)    | <0.001         | 0.80          | 400      |
| Conjugated fraction                   | 10.90 (3.47-34.24)  | <0.001         | 0.72          | 400      |
| G:T conjugation ratio                 | 0.47 (0.30-0.72)    | <0.001         | 0.69          | 399      |
| <b>CA</b>                             |                     |                |               |          |
| Total                                 | 1.06 (1.04-1.08)    | <0.001         | 0.80          | 400      |
| Unconjugated                          | 0.98 (0.90-1.06)    | 0.60           | 0.56          | 400      |
| GCA                                   | 1.05 (1.03-1.07)    | <0.001         | 0.79          | 400      |
| TCA                                   | 1.03 (1.02-1.03)    | <0.001         | 0.82          | 400      |
| Conjugated fraction                   | 42.27 (5.09-351.22) | <0.001         | 0.77          | 400      |
| G:T conjugation ratio                 | 0.30 (0.17-0.53)    | <0.001         | 0.72          | 393      |
| Fraction of bile acid pool            | 1.31 (1.04-1.65)    | 0.02           | 0.55          | 400      |
| <b>CDCA</b>                           |                     |                |               |          |
| Total                                 | 1.16 (1.11-1.20)    | <0.001         | 0.80          | 400      |
| Unconjugated                          | 0.98 (0.87-1.11)    | 0.75           | 0.53          | 400      |
| GCDCA                                 | 1.13 (1.09-1.16)    | <0.001         | 0.78          | 400      |
| TCDCA                                 | 1.09 (1.07-1.11)    | <0.001         | 0.83          | 400      |
| Conjugated fraction                   | 12.68 (3.30-48.76)  | <0.001         | 0.75          | 400      |
| G:T conjugation ratio                 | 0.20 (0.10-0.39)    | <0.001         | 0.74          | 399      |
| Fraction of bile acid pool            | 0.74 (0.50-1.11)    | 0.14           | 0.54          | 400      |
| <b>DCA</b>                            |                     |                |               |          |
| Total                                 | 1.02 (0.91-1.15)    | 0.71           | 0.56          | 400      |
| Unconjugated                          | 0.71 (0.48-1.06)    | 0.09           | 0.56          | 400      |
| GDCA                                  | 1.02 (0.94-1.11)    | 0.58           | 0.56          | 400      |
| TDCA                                  | 1.03 (0.99-1.07)    | 0.18           | 0.70          | 400      |
| Conjugated fraction                   | 7.35 (3.04-17.73)   | <0.001         | 0.71          | 345      |
| G:T conjugation ratio                 | 0.24 (0.12-0.45)    | <0.001         | 0.74          | 292      |
| Fraction of bile acid pool            | 0.08 (0.02-0.39)    | <0.001         | 0.61          | 400      |

| Parameter                                              | HR (95% CI)       | p-value | c-stat | n   |
|--------------------------------------------------------|-------------------|---------|--------|-----|
| <b>LCA</b>                                             |                   |         |        |     |
| Total                                                  | 1.12 (1.07-1.17)  | <0.001  | 0.66   | 400 |
| Unconjugated                                           | 1.12 (1.08-1.15)  | <0.001  | 0.62   | 400 |
| GLCA                                                   | 1.06 (1.02-1.10)  | 0.01    | 0.62   | 400 |
| TLCA                                                   | 1.05 (1.03-1.08)  | <0.001  | 0.75   | 400 |
| Conjugated fraction                                    | 1.08 (0.71-1.65)  | 0.70    | 0.53   | 286 |
| G:T conjugation ratio                                  | 0.55 (0.33-0.91)  | 0.02    | 0.65   | 169 |
| Fraction of bile acid pool                             | 1.00 (0.65-1.53)  | 0.99    | 0.49   | 400 |
| <b>HDCA</b>                                            |                   |         |        |     |
| Total                                                  | 0.98 (0.75-1.29)  | 0.90    | 0.52   | 400 |
| Unconjugated                                           | 1.06 (0.83-1.36)  | 0.65    | 0.49   | 400 |
| GHCA                                                   | 0.94 (0.80-1.11)  | 0.47    | 0.52   | 400 |
| THCA                                                   | na (0.00-na)      | Na      | na     | 400 |
| Conjugated fraction                                    | 0.81 (0.46-1.42)  | 0.46    | 0.52   | 231 |
| G:T conjugation ratio                                  | na (0.00-na)      | Na      | na     | 12  |
| Fraction of bile acid pool                             | 0.17 (0.04-0.76)  | 0.02    | 0.59   | 400 |
| <b>UDCA</b>                                            |                   |         |        |     |
| Total                                                  | 1.04 (1.03-1.06)  | <0.001  | 0.66   | 400 |
| Unconjugated                                           | 1.05 (1.02-1.08)  | <0.001  | 0.57   | 400 |
| GUDCA                                                  | 1.04 (1.02-1.05)  | <0.001  | 0.65   | 400 |
| TUDCA                                                  | 1.02 (1.01-1.02)  | <0.001  | 0.75   | 400 |
| Conjugated fraction                                    | 4.18 (1.97-8.87)  | <0.001  | 0.66   | 392 |
| G:T conjugation ratio                                  | 0.30 (0.17-0.54)  | <0.001  | 0.72   | 330 |
| Fraction of bile acid pool                             | 1.22 (0.81-1.83)  | 0.34    | 0.50   | 400 |
| <b>High total BA (&gt;17.79 <math>\mu</math>mol/L)</b> | 8.00 (3.60-17.77) | <0.001  | 0.72   | 400 |
| <b>UDCA treatment (predicted)</b>                      | 1.65 (0.94-2.90)  | 0.08    | 0.57   | 376 |
| <b>CA:CDCA Ratio</b>                                   | 1.19 (1.05-1.35)  | 0.01    | 0.62   | 400 |
| <b>CA:DCA Ratio</b>                                    | 1.00 (1.00-1.00)  | 0.67    | 0.71   | 345 |
| <b>Bilirubin (total)</b>                               | 1.15 (1.09-1.21)  | <0.001  | 0.77   | 370 |
| <b>Alkaline phosphatase (AP)</b>                       |                   |         |        |     |
| AP x ULN (upper limit of normal)                       | 1.21 (1.10-1.33)  | <0.001  | 0.70   | 375 |
| AP > 1.0 x ULN                                         | 7.93 (2.47-25.51) | <0.001  | 0.65   | 375 |
| AP > 1.5 x ULN                                         | 2.81 (1.51-5.23)  | 0.001   | 0.64   | 375 |

**Supplementary Table 15.** Univariate event rate (hepatic decompensation) by quartiles analyses.

| Parameter                  | Quartile of parameter value |       |       |       |
|----------------------------|-----------------------------|-------|-------|-------|
|                            | Q1                          | Q2    | Q3    | Q4    |
| <b>Total bile acids</b>    |                             |       |       |       |
| Total                      | 3.18                        | 4.42  | 14.56 | 45.51 |
| Total (excluding UDCA)     | 1.07                        | 9.56  | 12.35 | 45.75 |
| Conjugated fraction        | 3.20                        | 11.79 | 15.32 | 31.71 |
| G:T conjugation ratio      | 26.13                       | 15.83 | 14.48 | 4.29  |
| <b>CA</b>                  |                             |       |       |       |
| Total                      | 1.05                        | 3.27  | 21.90 | 40.81 |
| Unconjugated               | 17.71                       | 17.58 | 13.66 | 10.89 |
| GCA                        | 1.04                        | 5.59  | 20.26 | 38.52 |
| TCA                        | 0.00                        | 4.43  | 18.42 | 44.10 |
| Conjugated fraction        | 2.05                        | 8.18  | 15.19 | 41.70 |
| G:T conjugation ratio      | 37.62                       | 13.21 | 8.24  | 3.35  |
| Fraction of bile acid pool | 10.26                       | 17.94 | 11.83 | 19.66 |
| <b>CDCA</b>                |                             |       |       |       |
| Total                      | 4.21                        | 7.55  | 9.99  | 47.97 |
| Unconjugated               | 20.91                       | 9.83  | 17.19 | 12.34 |
| GCDCA                      | 3.12                        | 9.83  | 14.88 | 38.55 |
| TCDCA                      | 0.00                        | 7.52  | 13.81 | 48.07 |
| Conjugated fraction        | 0.00                        | 14.13 | 14.85 | 34.74 |
| G:T conjugation ratio      | 34.84                       | 20.37 | 4.31  | 3.30  |
| Fraction of bile acid pool | 16.40                       | 17.64 | 16.50 | 9.23  |
| <b>DCA</b>                 |                             |       |       |       |
| Total                      | 4.44                        | 18.72 | 23.18 | 14.15 |
| Unconjugated               | 11.47                       | 30.51 | 8.68  | 11.40 |
| GDCA                       | 5.61                        | 18.67 | 21.63 | 14.22 |
| TDCA                       | 2.21                        | 5.38  | 25.99 | 29.62 |
| Conjugated fraction        | 3.38                        | 14.82 | 35.28 | 9.36  |
| G:T conjugation ratio      | 36.66                       | 17.59 | 4.43  | 3.42  |
| Fraction of bile acid pool | 8.11                        | 37.57 | 14.33 | 2.27  |
| <b>LCA</b>                 |                             |       |       |       |
| Total                      | 5.53                        | 13.34 | 13.41 | 28.74 |
| Unconjugated               | 10.80                       | 12.59 | 11.28 | 25.80 |
| GLCA                       | 8.04                        | 11.84 | 15.13 | 25.52 |
| TLCA                       | 1.06                        | 8.21  | 10.36 | 44.74 |
| Conjugated fraction        | 19.95                       | 15.60 | 19.56 | 5.43  |
| G:T conjugation ratio      | 38.75                       | 18.80 | 3.35  | 2.22  |
| Fraction of bile acid pool | 4.39                        | 30.18 | 15.04 | 12.42 |
| <b>HDCA</b>                |                             |       |       |       |
| Total                      | 11.03                       | 20.91 | 11.53 | 16.72 |
| Unconjugated               | 11.09                       | 16.61 | 19.70 | 12.55 |
| GHCA                       | 14.84                       | 5.29  | 28.01 | 12.79 |

| Parameter                  | Quartile of parameter value |       |       |       |
|----------------------------|-----------------------------|-------|-------|-------|
|                            | Q1                          | Q2    | Q3    | Q4    |
| <b>HDCA (cont.)</b>        |                             |       |       |       |
| THDCA                      | 13.26                       | 18.92 | 6.87  | 21.08 |
| Conjugated fraction        | 15.01                       | 16.07 | 5.83  | 23.05 |
| G:T conjugation ratio      | 29.81                       | 25.55 | 5.58  | 3.08  |
| Fraction of bile acid pool | 6.72                        | 31.92 | 15.32 | 7.79  |
| <b>UDCA</b>                |                             |       |       |       |
| Total                      | 11.91                       | 10.76 | 6.51  | 33.66 |
| Unconjugated               | 19.19                       | 4.68  | 11.36 | 24.87 |
| GUDCA                      | 15.53                       | 8.07  | 3.25  | 36.78 |
| TUDCA                      | 4.16                        | 10.69 | 11.48 | 37.41 |
| Conjugated fraction        | 3.11                        | 12.29 | 24.77 | 21.43 |
| G:T conjugation ratio      | 34.27                       | 21.17 | 5.64  | 3.07  |
| Fraction of bile acid pool | 21.46                       | 4.50  | 19.11 | 15.12 |
| <b>CA:CDCA Ratio</b>       | 6.85                        | 9.69  | 16.79 | 26.52 |
| <b>CA:DCA Ratio</b>        | 2.24                        | 14.33 | 36.40 | 9.37  |

Event rate calculated as Number of Events / Person Years



**Supplementary Table 16.** Variables and relative influence on GBM Model

| <b>Variable</b>            | <b>Relative Influence</b> | <b>Influence direction<sup>#</sup></b> |
|----------------------------|---------------------------|----------------------------------------|
| Age (per decade)           | 14.684                    | Increase                               |
| TUDCA                      | 14.475                    | Increase                               |
| TCDCA                      | 12.421                    | Increase                               |
| TLCA                       | 8.865                     | Increase                               |
| TCA                        | 8.603                     | Increase                               |
| TBA                        | 4.234                     | Increase                               |
| DCA (fraction of BA pool)  | 3.606                     | Decrease                               |
| GDCA                       | 3.023                     | Decrease                               |
| CDCA (total)               | 2.890                     | Increase                               |
| LCA (total)                | 2.462                     | Increase                               |
| LCA (conjugated fraction)  | 2.198                     | Decrease                               |
| CA (fraction of BA pool)   | 1.831                     | Increase                               |
| GCDCA                      | 1.814                     | Increase                               |
| CA (conjugated fraction)   | 1.775                     | Increase                               |
| GUDCA                      | 1.739                     | Increase                               |
| TDCA                       | 1.421                     | Decrease                               |
| TBA (conjugated fraction)  | 1.386                     | Increase                               |
| CA (total)                 | 1.356                     | Increase                               |
| DCA (conjugated fraction)  | 1.207                     | Increase                               |
| UDCA (fraction of BA pool) | 1.191                     | Decrease                               |
| UDCA (total)               | 1.123                     | Increase                               |
| CDCA (conjugated fraction) | 1.086                     | Decrease                               |
| GLCA                       | 0.947                     | Decrease                               |
| GCA                        | 0.873                     | Decrease                               |
| UDCA (conjugated fraction) | 0.849                     | Increase                               |
| DCA (total)                | 0.787                     | Decrease                               |
| LCA (fraction of BA pool)  | 0.659                     | Increase                               |
| CDCA (unconjugated)        | 0.576                     | Increase                               |
| UDCA (unconjugated)        | 0.451                     | Decrease                               |
| HDCA (unconjugated)        | 0.426                     | Increase                               |
| CDCA (fraction of BA pool) | 0.361                     | Decrease                               |
| CA (unconjugated)          | 0.144                     | Decrease                               |
| HDCA (fraction of BA pool) | 0.121                     | Decrease                               |
| HDCA (total)               | 0.102                     | Increase                               |
| Male sex                   | 0.100                     | Decrease                               |
| DCA (unconjugated)         | 0.070                     | Decrease                               |
| GHDCa                      | 0.038                     | Increase                               |
| HDCA (conjugated fraction) | 0.000                     | Decrease                               |
| THDCA                      | 0.000                     | Decrease                               |
| UDCA use (calculated)      | 0.000                     | Increase                               |

# Increase or decreased risk of hepatic decompensation with increase in value of variable based on visualization of functional form plots. For instance, increased TUDCA concentration increased risk in the model whereas increased GDCA concentration lowered the risk.

**Supplementary Table 17.** Bile acids in PSC patients: Derivation and Validation cohorts.

|                            | PSC (derivation)   | PSC (validation)   | p-value | PSC Der (n) | PSC Val (n) |
|----------------------------|--------------------|--------------------|---------|-------------|-------------|
| <b>Total BA</b>            |                    |                    |         |             |             |
| Median (IQR)               | 16.34 (6.04-44.31) | 14.31 (5.12-59.30) | 0.895   | 400         | 108         |
| Range                      | 0.54-646.47        | 0.74-457.45        |         |             |             |
| <b>CA (total)</b>          |                    |                    |         |             |             |
| Median (IQR)               | 2.09 (0.73-10.01)  | 3.01 (1.26-20.19)  | 0.019   | 400         | 108         |
| Range                      | 0.04-224.36        | 0.15-251.95        |         |             |             |
| <b>CA (unconjugated)</b>   |                    |                    |         |             |             |
| Median (IQR)               | 0.06 (0.03-0.22)   | 0.04 (0.02-0.09)   | 0.003   | 400         | 108         |
| Range                      | 0.00-10.65         | 0.00-3.92          |         |             |             |
| <b>GCA</b>                 |                    |                    |         |             |             |
| Median (IQR)               | 1.60 (0.44-6.12)   | 2.03 (0.98-15.33)  | 0.010   | 400         | 108         |
| Range                      | 0.01-165.50        | 0.11-192.78        |         |             |             |
| <b>TCA</b>                 |                    |                    |         |             |             |
| Median (IQR)               | 0.25 (0.06-2.44)   | 0.42 (0.14-6.64)   | 0.003   | 400         | 108         |
| Range                      | 0.00-58.61         | 0.01-149.57        |         |             |             |
| <b>CDCA (total)</b>        |                    |                    |         |             |             |
| Median (IQR)               | 4.09 (1.61-9.81)   | 4.30 (1.86-12.04)  | 0.482   | 400         | 108         |
| Range                      | 0.10-268.56        | 0.31-125.26        |         |             |             |
| <b>CDCA (unconjugated)</b> |                    |                    |         |             |             |
| Median (IQR)               | 0.15 (0.05-0.46)   | 0.07 (0.02-0.20)   | <0.001  | 400         | 108         |
| Range                      | 0.00-14.78         | 0.01-5.13          |         |             |             |
| <b>GCDCA</b>               |                    |                    |         |             |             |
| Median (IQR)               | 2.87 (1.10-6.90)   | 2.77 (1.30-7.63)   | 0.672   | 400         | 108         |
| Range                      | 0.02-214.48        | 0.19-87.38         |         |             |             |
| <b>TCDCA</b>               |                    |                    |         |             |             |
| Median (IQR)               | 0.47 (0.13-2.12)   | 0.92 (0.30-3.98)   | 0.003   | 400         | 108         |
| Range                      | 0.00-52.46         | 0.02-67.72         |         |             |             |
| <b>DCA (total)</b>         |                    |                    |         |             |             |
| Median (IQR)               | 0.66 (0.03-1.76)   | 0.61 (0.16-1.79)   | 0.702   | 400         | 108         |
| Range                      | 0.00-24.36         | 0.00-20.69         |         |             |             |
| <b>DCA (unconjugated)</b>  |                    |                    |         |             |             |
| Median (IQR)               | 0.10 (0.01-0.44)   | 0.05 (0.00-0.16)   | 0.025   | 400         | 108         |
| Range                      | 0.00-5.99          | 0.00-2.96          |         |             |             |
| <b>GDCA</b>                |                    |                    |         |             |             |
| Median (IQR)               | 0.28 (0.02-0.96)   | 0.38 (0.10-1.13)   | 0.158   | 400         | 108         |
| Range                      | 0.00-15.49         | 0.00-16.97         |         |             |             |

|                            | PSC (derivation)  | PSC (validation)  | p-value | PSC Der (n) | PSC Val (n) |
|----------------------------|-------------------|-------------------|---------|-------------|-------------|
| <b>TDCA</b>                |                   |                   |         |             |             |
| Median (IQR)               | 0.06 (0.00-0.27)  | 0.07 (0.01-0.25)  | 0.266   | 400         | 108         |
| Range                      | 0.00-8.55         | 0.00-3.71         |         |             |             |
| <b>LCA (total)</b>         |                   |                   |         |             |             |
| Median (IQR)               | 0.04 (0.00-0.15)  | 0.02 (0.00-0.05)  | 0.010   | 400         | 108         |
| Range                      | 0.00-2.85         | 0.00-1.82         |         |             |             |
| <b>LCA (unconjugated)</b>  |                   |                   |         |             |             |
| Median (IQR)               | 0.01 (0.00-0.04)  | 0.01 (0.00-0.02)  | 0.043   | 400         | 108         |
| Range                      | 0.00-0.96         | 0.00-0.23)        |         |             |             |
| <b>GLCA</b>                |                   |                   |         |             |             |
| Median (IQR)               | 0.02 (0.00-0.09)  | 0.00 (0.00-0.00)  | <0.001  | 400         | 108         |
| Range                      | 0.00-2.14         | 0.00-1.38         |         |             |             |
| <b>TLCA</b>                |                   |                   |         |             |             |
| Median (IQR)               | 0.00 (0.00-0.02)  | 0.01 (0.00-0.02)  | 0.037   | 400         | 108         |
| Range                      | 0.00-0.56)        | 0.00-0.26         |         |             |             |
| <b>HDCA (total)</b>        |                   |                   |         |             |             |
| Median (IQR)               | 0.01 (0.00-0.04)  | 0.01 (0.00-0.03)  | 0.117   | 400         | 108         |
| Range                      | 0.00-0.73         | 0.00-0.18         |         |             |             |
| <b>HDCA (unconjugated)</b> |                   |                   |         |             |             |
| Median (IQR)               | 0.01 (0.00-0.02)  | 0.00 (0.00-0.02)  | 0.063   | 400         | 108         |
| Range                      | 0.00-0.24         | 0.00-0.16         |         |             |             |
| <b>GHDCA</b>               |                   |                   |         |             |             |
| Median (IQR)               | 0.00 (0.00-0.01)  | 0.00 (0.00-0.00)  | 0.004   | 400         | 108         |
| Range                      | 0.00-0.73         | 0.00-0.09         |         |             |             |
| <b>THDCA</b>               |                   |                   |         |             |             |
| Median (IQR)               | 0.00 (0.00-0.00)  | 0.00 (0.00-0.00)  | 0.065   | 400         | 108         |
| Range                      | 0.00-0.07         | 0.00-0.10         |         |             |             |
| <b>UDCA (total)</b>        |                   |                   |         |             |             |
| Median (IQR)               | 1.95 (0.19-18.27) | 0.36 (0.09-10.56) | 0.039   | 400         | 108         |
| Range                      | 0.00-537.71       | 0.00-308.01       |         |             |             |
| <b>UDCA (unconjugated)</b> |                   |                   |         |             |             |
| Median (IQR)               | 0.17 (0.01-2.02)  | 0.05 (0.00-0.53)  | <0.001  | 400         | 108         |
| Range                      | 0.00-52.33        | 0.00-17.16        |         |             |             |
| <b>GUDCA</b>               |                   |                   |         |             |             |
| Median (IQR)               | 1.53 (0.12-13.52) | 0.27 (0.06-9.42)  | 0.063   | 400         | 108         |
| Range                      | 0.00-472.47       | 0.00-278.90       |         |             |             |
| <b>TUDCA</b>               |                   |                   |         |             |             |
| Median (IQR)               | 0.09 (0.01-0.52)  | 0.06 (0.01-0.60)  | 0.428   | 400         | 108         |
| Range                      | 0.00-51.06        | 0.00-44.90        |         |             |             |

|                               | <b>PSC (derivation)</b> | <b>PSC (validation)</b> | <b>p-value</b> | <b>PSC Der (n)</b> | <b>PSC Val (n)</b> |
|-------------------------------|-------------------------|-------------------------|----------------|--------------------|--------------------|
| <b>Total BA (conj. frac.)</b> |                         |                         |                |                    |                    |
| Median (IQR)                  | 0.91 (0.74-0.98)        | 0.95 (0.88-0.99)        | <0.001         | 400                | 108                |
| Range                         | 0.13-1.00               | 0.23-1.00               |                |                    |                    |
| <b>CA (conj. frac.)</b>       |                         |                         |                |                    |                    |
| Median (IQR)                  | 0.97 (0.85-0.99)        | 0.98 (0.94-1.00)        | <0.001         | 400                | 108                |
| Range                         | 0.09-1.00               | 0.185-1.00              |                |                    |                    |
| <b>CDCA (conj. frac.)</b>     |                         |                         |                |                    |                    |
| Median (IQR)                  | 0.95 (0.83-0.99)        | 0.98 (0.92-1.00)        | <0.001         | 400                | 108                |
| Range                         | 0.12-1.00               | 0.23-1.00               |                |                    |                    |
| <b>DCA (conj. frac.)</b>      |                         |                         |                |                    |                    |
| Median (IQR)                  | 0.80 (0.52-0.95)        | 0.92 (0.74-0.98)        | <0.001         | 345                | 95                 |
| Range                         | 0.00-1.00               | 0.00-1.00               |                |                    |                    |
| <b>LCA (conj. frac.)</b>      |                         |                         |                |                    |                    |
| Median (IQR)                  | 0.75 (0.56-0.87)        | 0.71 (0.40-0.88)        | 0.069          | 286                | 77                 |
| Range                         | 0.00-1.00               | 0.00-1.00               |                |                    |                    |
| <b>HDCA (conj. frac.)</b>     |                         |                         |                |                    |                    |
| Median (IQR)                  | 0.22 (0.00-0.55)        | 0.00 (0.00-0.48)        | 0.134          | 231                | 55                 |
| Range                         | 0.00-1.00               | 0.00-1.00               |                |                    |                    |
| <b>UDCA (conj. frac.)</b>     |                         |                         |                |                    |                    |
| Median (IQR)                  | 0.90 (0.75-0.97)        | 0.95 (0.86-1.00)        | <0.001         | 392                | 105                |
| Range                         | 0.00-1.00               | 0.23-1.00               |                |                    |                    |
| <b>Total BA (G:T ratio)</b>   |                         |                         |                |                    |                    |
| Median (IQR)                  | 8.36 (3.57-17.44)       | 4.70 (2.55-8.21)        | <0.001         | 399                | 108                |
| Range                         | 0.37-93.11              | 0.45-57.86              |                |                    |                    |
| <b>CA (G:T ratio)</b>         |                         |                         |                |                    |                    |
| Median (IQR)                  | 5.56 (2.72-9.23)        | 4.71 (2.25-8.07)        | 0.038          | 393                | 108                |
| Range                         | 0.27-70.33              | 0.49-19.00              |                |                    |                    |
| <b>CDCA (G:T ratio)</b>       |                         |                         |                |                    |                    |
| Median (IQR)                  | 5.76 (2.80-10.30)       | 3.24 (1.83-5.53)        | <0.001         | 399                | 108                |
| Range                         | 0.36-92.17              | 0.37-21.00              |                |                    |                    |
| <b>DCA (G:T ratio)</b>        |                         |                         |                |                    |                    |
| Median (IQR)                  | 4.90 (2.13-8.26)        | 4.97 (2.82-9.25)        | 0.290          | 292                | 89                 |
| Range                         | 0.22-45.00              | 0.68-30.29              |                |                    |                    |
| <b>LCA (G:T ratio)</b>        |                         |                         |                |                    |                    |
| Median (IQR)                  | 3.00 (1.40-6.22)        | 2.43 (1.00-5.00)        | 0.174          | 169                | 23                 |
| Range                         | 0.10-36.00              | 0.50-11.57              |                |                    |                    |
| <b>HDCA (G:T ratio)</b>       |                         |                         |                |                    |                    |
| Median (IQR)                  | 1.17 (1.00-1.88)        | 1.50 (1.50-1.80)        | 0.336          | 12                 | 5                  |
| Range                         | 0.71-11.00              | 1.00-2.67               |                |                    |                    |

|                             | <b>PSC (derivation)</b> | <b>PSC (validation)</b> | <b>p-value</b> | <b>PSC<br/>Der (n)</b> | <b>PSC<br/>Val (n)</b> |
|-----------------------------|-------------------------|-------------------------|----------------|------------------------|------------------------|
| <b>UDCA (G:T ratio)</b>     |                         |                         |                |                        |                        |
| Median (IQR)                | 18.40 (7.25-35.75)      | 9.26 (4.45-18.00)       | <0.001         | 330                    | 83                     |
| Range                       | 0.14-145.00             | 0.27-107.33             |                |                        |                        |
| <b>CA (frac. BA pool)</b>   |                         |                         |                |                        |                        |
| Median (IQR)                | 0.18 (0.08-0.36)        | 0.29 (0.18-0.44)        | <0.001         | 400                    | 108                    |
| Range                       | 0.01-0.79               | 0.02-0.87               |                |                        |                        |
| <b>CDCA (frac. BA pool)</b> |                         |                         |                |                        |                        |
| Median (IQR)                | 0.26 (0.15-0.46)        | 0.32 (0.19-0.46)        | 0.153          | 400                    | 108                    |
| Range                       | 0.04-0.93               | 0.09-0.79               |                |                        |                        |
| <b>DCA (frac. BA pool)</b>  |                         |                         |                |                        |                        |
| Median (IQR)                | 0.04 (0.01-0.14)        | 0.03 (0.01-0.15)        | 0.532          | 400                    | 108                    |
| Range                       | 0.00-0.64               | 0.00-0.54               |                |                        |                        |
| <b>LCA (frac. BA pool)</b>  |                         |                         |                |                        |                        |
| Median (IQR)                | 0.00 (0.00-0.01)        | 0.00 (0.00-0.00)        | 0.004          | 400                    | 108                    |
| Range                       | 0.00-0.12               | 0.00-0.05               |                |                        |                        |
| <b>HDCA (frac. BA pool)</b> |                         |                         |                |                        |                        |
| Median (IQR)                | 0.00 (0.00-0.01)        | 0.00 (0.00-0.00)        | 0.064          | 400                    | 108                    |
| Range                       | 0.00-0.05               | 0.00-0.04               |                |                        |                        |
| <b>UDCA (frac. BA pool)</b> |                         |                         |                |                        |                        |
| Median (IQR)                | 0.18 (0.02-0.66)        | 0.05 (0.01-0.47)        | <0.001         | 400                    | 108                    |
| Range                       | 0.00-0.91               | 0.00-0.84               |                |                        |                        |
| <b>CA:CDCA ratio</b>        |                         |                         |                |                        |                        |
| Median (IQR)                | 0.60 (0.35-1.12)        | 0.89 (0.49-1.60)        | <0.001         | 400                    | 108                    |
| Range                       | 0.05-5.26               | 0.13-7.15               |                |                        |                        |
| <b>CA:DCA ratio</b>         |                         |                         |                |                        |                        |
| Median (IQR)                | 2.60 (0.79-26.43)       | 4.47 (1.38-32.18)       | 0.101          | 345                    | 95                     |
| Range                       | 0.09-3796.67            | 0.09-1683.67            |                |                        |                        |
| <b>CDCA:LCA+HDCA+UDCA</b>   |                         |                         |                |                        |                        |
| Median (IQR)                | 1.57 (0.22-13.81)       | 5.93 (0.38-22.31)       | 0.002          | 392                    | 105                    |
| Range                       | 0.04-1310.00            | 0.12-673.13             |                |                        |                        |

**Supplementary Figure 1.** Bile acids by age in PSC and controls.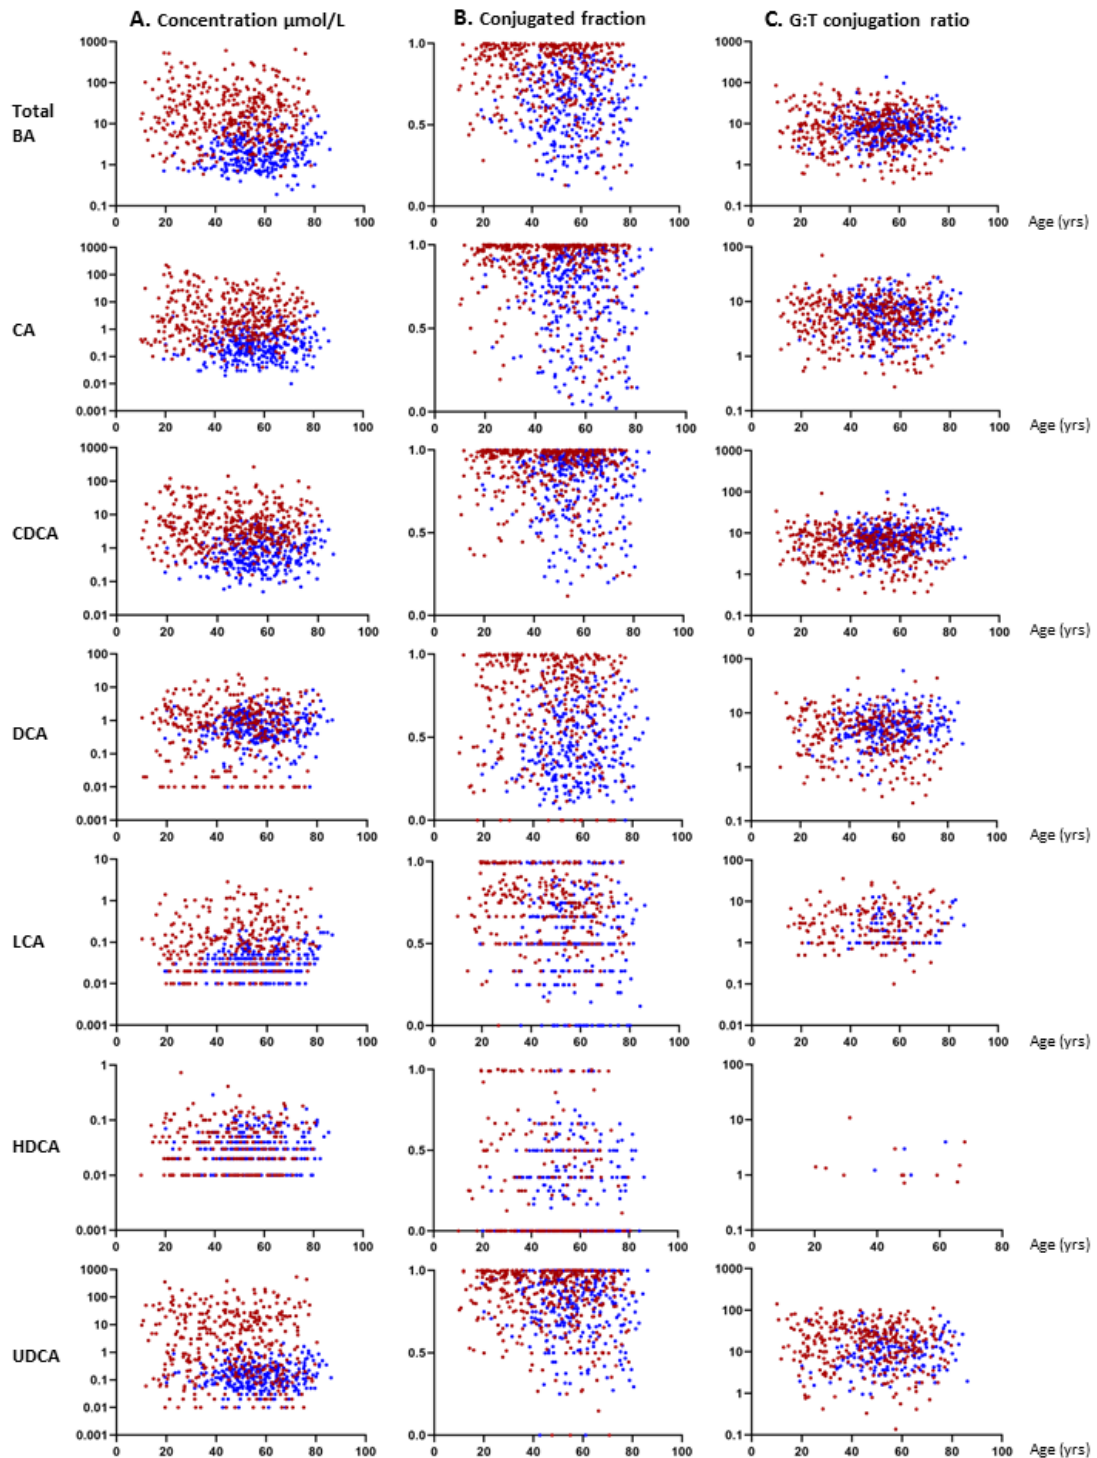**Supplementary Figure 1.** Plots showing bile acid (A) concentration, (B) conjugated fraction and (C) G:T conjugation ratio (Y axis) by age in years (X axis). Red dots indicate PSC patients and blue dots indicate controls.

**Supplementary Figure 2.** Bile acids by sex in PSC and controls.

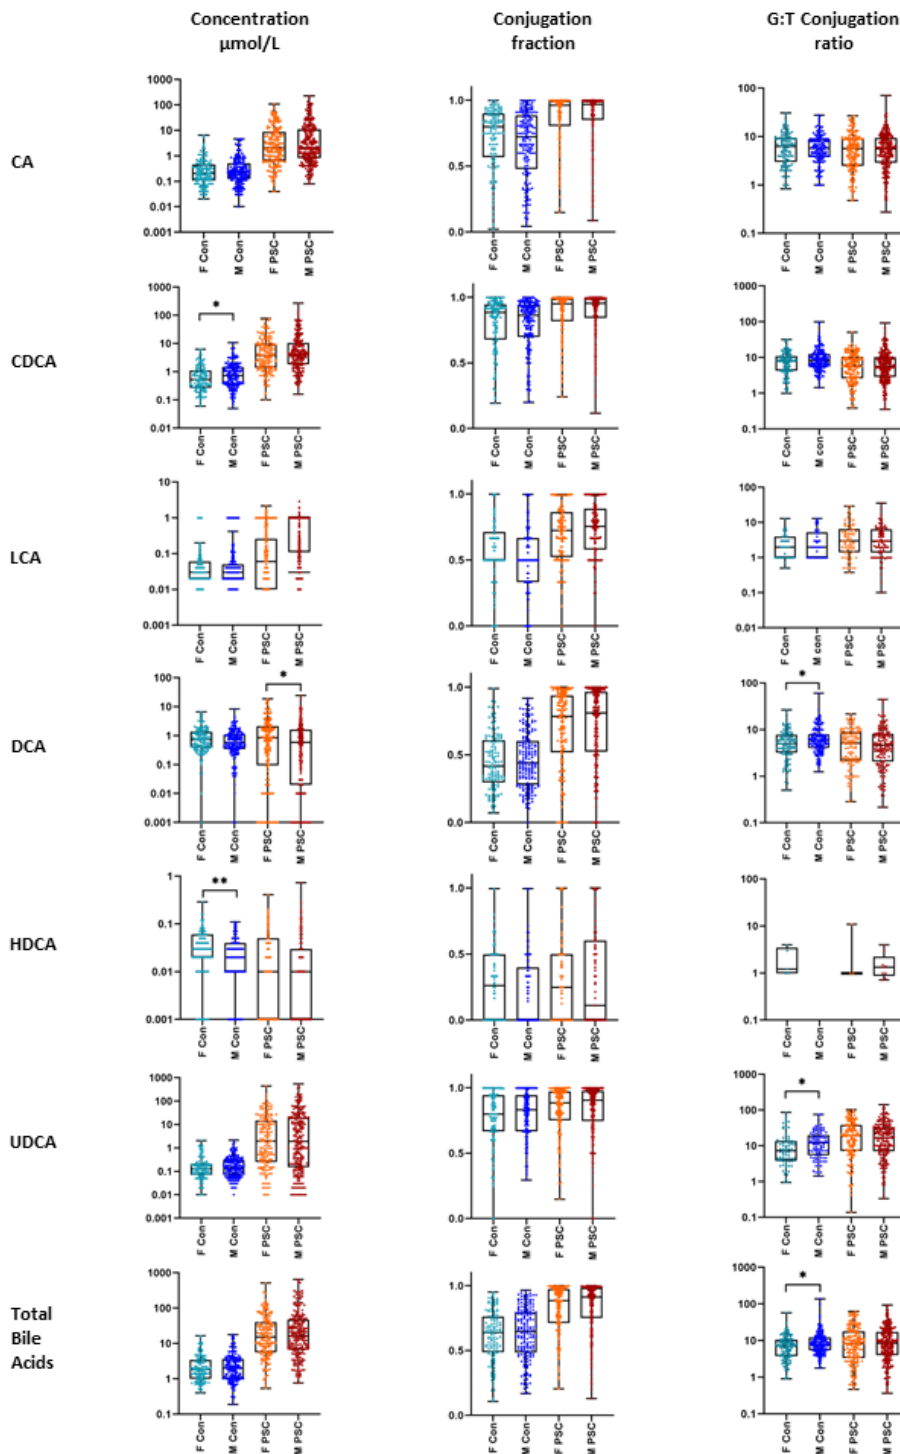

**Supplementary Figure 2.** Plots showing bile acid (A) concentration, (B) conjugated fraction and (C) G:T conjugation ratio by comparing values in females to males within PSC and control groups. \*p<0.05, \*\*p<0.01.

**Supplementary Figure 3.** Bile acids in controls and PSC patients by bile acid group.

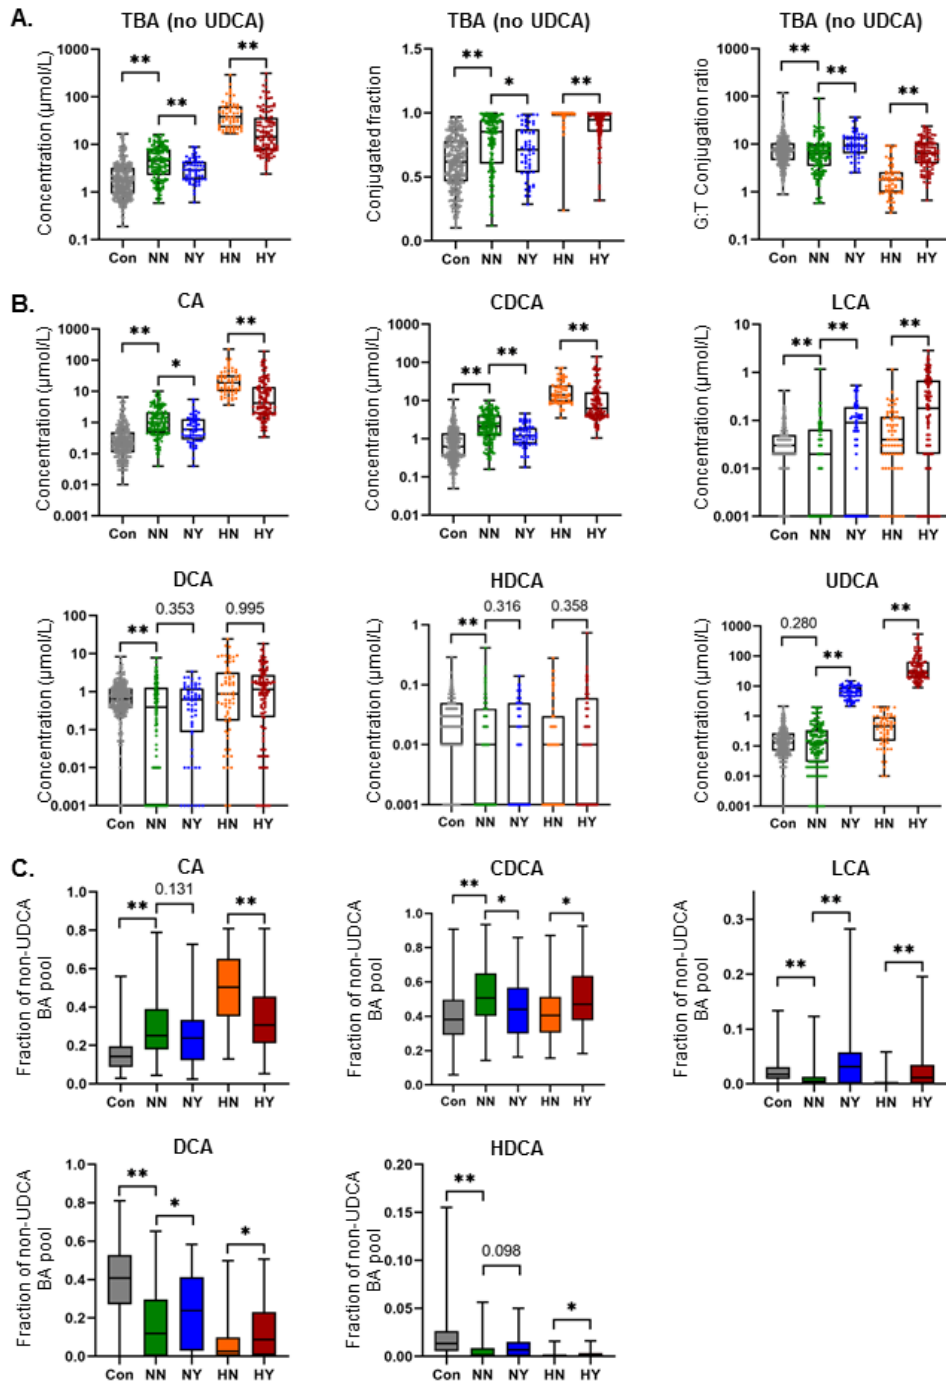

**Supplementary Figure 3.** Plots showing (A) concentration, conjugation fraction, and G:T conjugation ratio of total bile acids (TBA) with UDCA, GUDCA and TUDCA removed; (B) concentration of bile acid “families” (i.e., the sum of conjugated and unconjugated forms); and (C) bile acid “families” as a fraction of the non-UDCA BA pool in controls (Con) and PSC patients separated by BA group. NN: normal TBA, no UDCA; NY: normal TBA, yes UDCA; HN: high TBA, no UDCA; HY: high TBA, yes UDCA. \* $p < 0.05$ , \*\* $p < 0.001$



**Supplementary Figure 4.** Bile acids in cirrhotic and non-cirrhotic PSC patients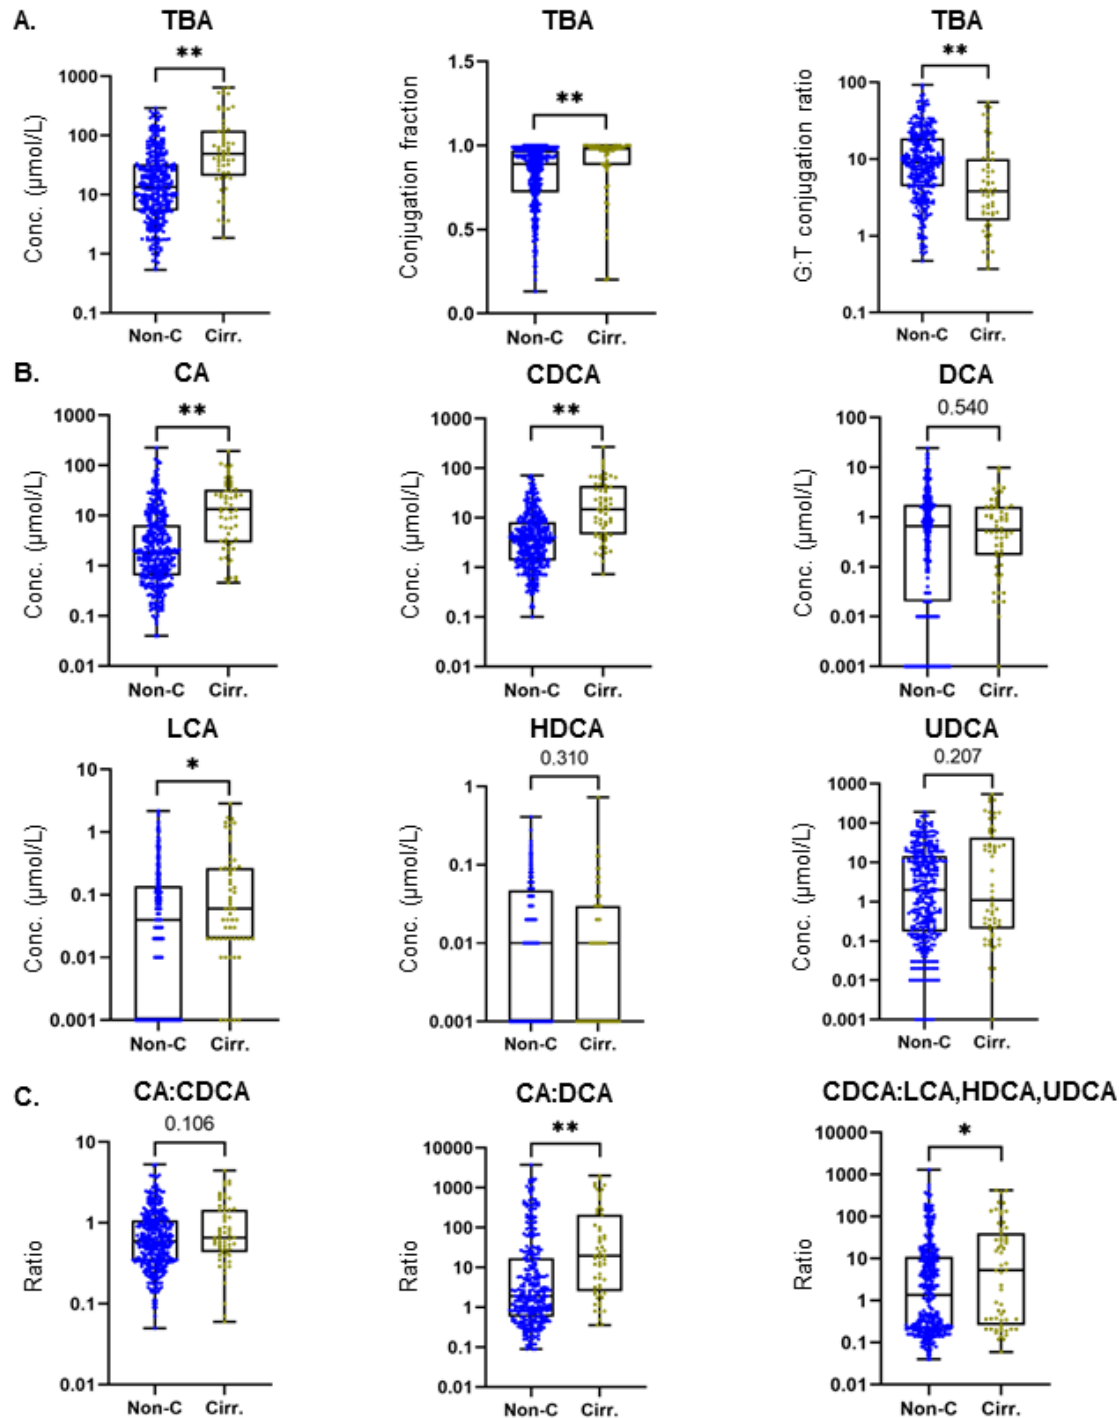

**Supplementary Figure 4.** Plots showing (A) concentration, conjugation fraction and G:T conjugation ratio of total bile acid (TBA); (B) concentration of bile acid “families” (i.e., total of conjugated and unconjugated forms); and (C) bile acid ratios in PSC patients who were non-cirrhotic (Non-C) or cirrhotic (Cirr.) at time of sample collection. \* $p < 0.05$ , \*\* $p < 0.001$

Supplementary Figure 5. BA correlation plots in PSC and controls.

A. Controls

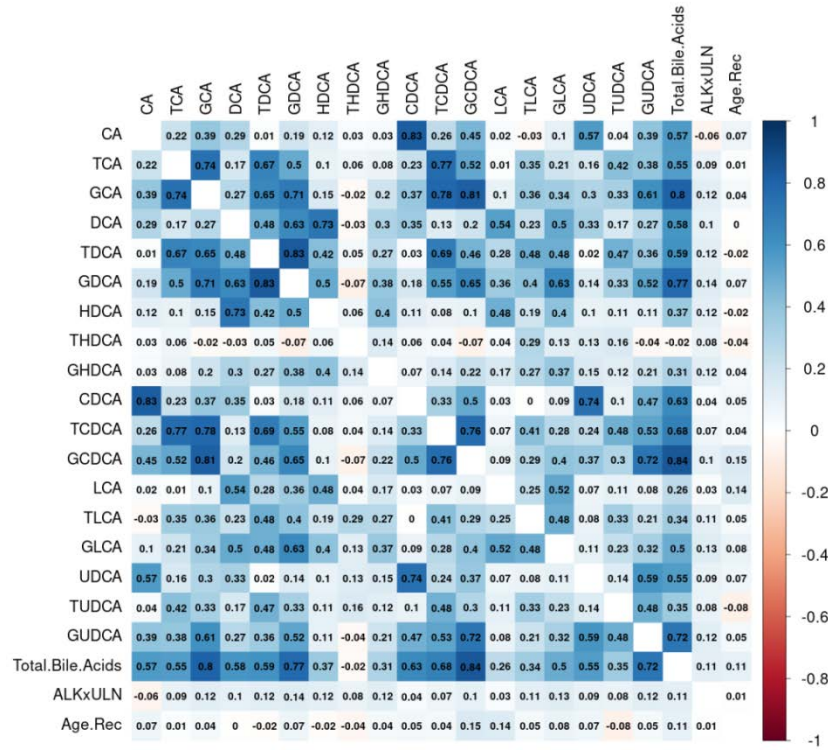

B. PSC

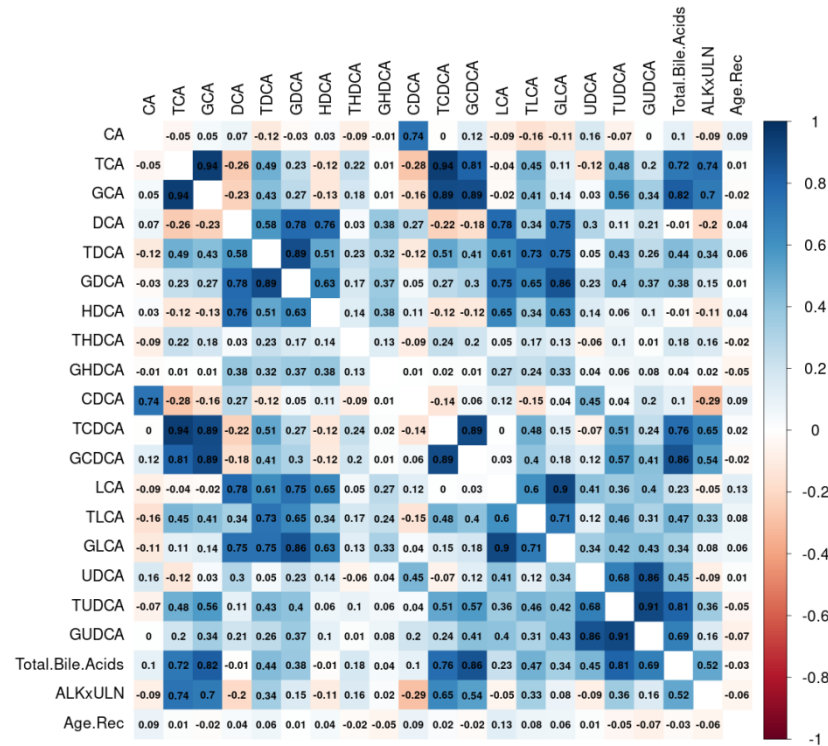

Supplementary Figure 5. Spearman correlation plots of BA concentrations in (A) controls and (B) PSC patients. Dark blue values indicate high correlation whereas red values indicate low correlation.

**Supplementary Figure 6.** Alternate GBM models using BA profiles

**A. Remove SD and AIH patients from GBM model – Concordance = 0.95**

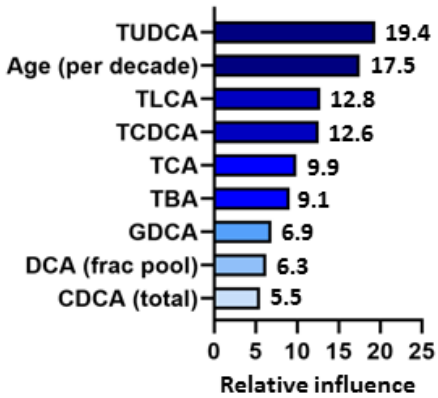

**B. Add Cirrhosis phenotype to GBM model – Concordance = 0.95**

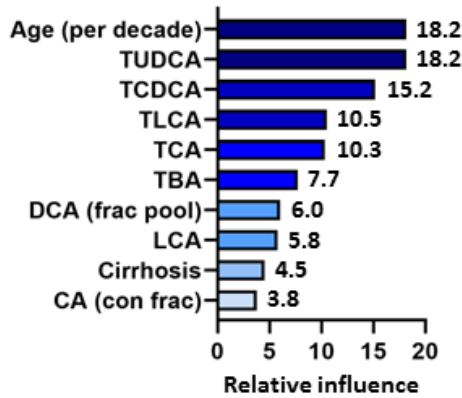

**C. Add Bilirubin (Total) to GBM model Concordance = 0.95**

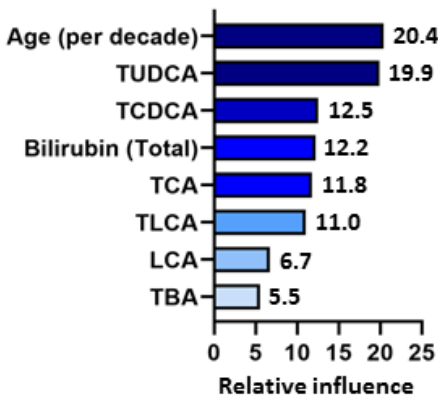

**D. Add ALP (times upper limit of normal) to GBM model – Concordance = 0.96**

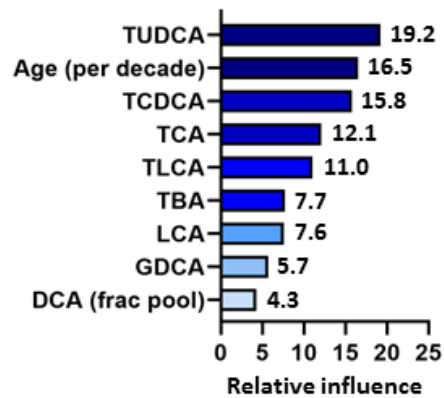

**Supplementary Figure 6.** Alternate GBM models using BA profiles with (A) PSC patients with small duct (SD) disease and/or having overlapping autoimmune hepatitis (AIH) removed, (B) cirrhosis phenotype (yes/no) added to the model, (C) Bilirubin (total) added to the model, and (D) alkaline phosphatase (ALP) added to the model.
